# Supplementary material for: Synthesis of N-dialkylphosphoryl iminosugar derivatives and their immunosuppressive activities
Source: Royal Society of Chemistry journal article supplement (doi:10.1039/c5ob01278c), 2015-01-01
Supplement: c5ob01278c1.pdf [file c5ob01278c1.pdf]

## Electronic Supplementary Information

### Synthesis of *N*-Dialkylphosphoryl Iminosugar Derivatives and Their Immunosuppressive Activities

Xuemei Yang,<sup>+a,b</sup> De-Cai Xiong,<sup>+a</sup> Chengcheng Song,<sup>a,c</sup> Guihua Tai<sup>c</sup> and Xin-Shan Ye<sup>\*a</sup>

<sup>a</sup>State Key Laboratory of Natural and Biomimetic Drugs, School of Pharmaceutical Sciences, Peking University, Xue Yuan Road No. 38, Beijing 100191, China. E-mail: xinshan@bjmu.edu.cn; Fax: +86-10-82802724; Tel: +86-10-82805736.

<sup>b</sup>School of Pharmacy, Guangdong Medical College, Dongguan 523808, China.

<sup>c</sup>School of Life Sciences, Northeast Normal University, Changchun 130024, China.

<sup>+</sup>These authors contributed equally to this work.

#### Table of contents

|                                                                                                       |     |
|-------------------------------------------------------------------------------------------------------|-----|
| Chemistry Section                                                                                     | S1  |
| Biology Section                                                                                       | S8  |
| References                                                                                            | S9  |
| <sup>1</sup> H NMR Spectrum of Compound <b>9</b>                                                      | S9  |
| <sup>1</sup> H NMR Spectrum of Compound <b>13</b>                                                     | S10 |
| <sup>1</sup> H, <sup>13</sup> C and <sup>31</sup> P NMR Spectra of Compound <b>15j</b>                | S10 |
| <sup>1</sup> H, <sup>13</sup> C and <sup>31</sup> P NMR Spectra of Compound <b>15k</b>                | S12 |
| <sup>1</sup> H, <sup>13</sup> C and <sup>31</sup> P NMR Spectra of Compound <b>15l</b>                | S13 |
| <sup>1</sup> H, <sup>13</sup> C and <sup>31</sup> P NMR Spectra of Compound <b>16a</b>                | S15 |
| <sup>1</sup> H, <sup>13</sup> C and <sup>31</sup> P NMR Spectra of Compound <b>16b</b>                | S16 |
| <sup>1</sup> H, <sup>13</sup> C and <sup>31</sup> P NMR Spectra of Compound <b>16c</b>                | S18 |
| <sup>1</sup> H, <sup>13</sup> C and <sup>31</sup> P NMR Spectra of Compound <b>16d</b>                | S19 |
| <sup>1</sup> H, <sup>13</sup> C and <sup>31</sup> P NMR Spectra of Compound <b>16e</b>                | S21 |
| <sup>1</sup> H, <sup>13</sup> C and <sup>31</sup> P NMR Spectra of Compound <b>16f</b>                | S22 |
| <sup>1</sup> H, <sup>13</sup> C and <sup>31</sup> P NMR Spectra of Compound <b>16g</b>                | S24 |
| <sup>1</sup> H, <sup>13</sup> C and <sup>31</sup> P NMR Spectra of Compound <b>16h</b>                | S25 |
| <sup>1</sup> H, <sup>13</sup> C, <sup>31</sup> P, H-H COSY and HSQC Spectra of Compound <b>16i</b>    | S27 |
| <sup>1</sup> H, <sup>13</sup> C and <sup>31</sup> P NMR Spectra of Compound <b>16j</b>                | S29 |
| <sup>1</sup> H, <sup>13</sup> C, <sup>31</sup> P, H-H COSY and HSQC Spectra of Compound <b>16k</b>    | S31 |
| <sup>1</sup> H, <sup>13</sup> C and <sup>31</sup> P NMR Spectra of Compound <b>16l</b>                | S33 |
| <sup>1</sup> H, <sup>13</sup> C and <sup>31</sup> P NMR Spectra of Compound <b>8a</b>                 | S35 |
| <sup>1</sup> H, <sup>13</sup> C and <sup>31</sup> P NMR Spectra of Compound <b>8b</b>                 | S36 |
| <sup>1</sup> H, <sup>13</sup> C and <sup>31</sup> P NMR Spectra of Compound <b>8c</b>                 | S38 |
| <sup>1</sup> H, <sup>13</sup> C and <sup>31</sup> P NMR Spectra of Compound <b>8d</b>                 | S39 |
| <sup>1</sup> H, <sup>13</sup> C and <sup>31</sup> P NMR Spectra of Compound <b>8e</b>                 | S41 |
| <sup>1</sup> H, <sup>13</sup> C and <sup>31</sup> P NMR Spectra of Compound <b>8f</b>                 | S42 |
| <sup>1</sup> H, <sup>13</sup> C and <sup>31</sup> P NMR Spectra of Compound <b>8g</b>                 | S44 |
| <sup>1</sup> H, <sup>13</sup> C and <sup>31</sup> P NMR Spectra of Compound <b>8h</b>                 | S45 |
| <sup>1</sup> H, <sup>13</sup> C and <sup>31</sup> P NMR Spectra of Compound <b>8i</b>                 | S47 |
| <sup>1</sup> H, <sup>13</sup> C and <sup>31</sup> P NMR Spectra of Compound <b>8j</b>                 | S48 |
| <sup>1</sup> H, <sup>13</sup> C, <sup>31</sup> P, H-H COSY and HSQC NMR Spectra of Compound <b>8k</b> | S50 |
| <sup>1</sup> H, <sup>13</sup> C and <sup>31</sup> P NMR Spectra of Compound <b>8l</b>                 | S52 |

## Chemistry Section

**General.** All chemicals were purchased as reagent grade and used without further purification except otherwise noted. Dichloromethane ( $\text{CH}_2\text{Cl}_2$ ) and acetonitrile ( $\text{CH}_3\text{CN}$ ) were distilled over calcium hydride ( $\text{CaH}_2$ ). Tetrahydrofuran (THF) was distilled over sodium potassium alloy. Methanol was distilled from magnesium. Pulverized molecular sieves 3Å MS for reductive amination were activated by heating at 400 °C for 6 hours. Reactions were monitored by thin-layer chromatography (TLC) analysis, which was visualized by UV light (254 nm) and acidic ceric ammonium molybdate. Solvents were evaporated under reduced pressure and below 40 °C (water bath). Column chromatography was performed on silica gel.  $^1\text{H}$  NMR spectra were recorded on the Avance III 400 instruments from Bruker at room temperature. Chemical shifts (in ppm) were referenced to tetramethylsilane ( $\delta = 0$  ppm) in deuterated chloroform.  $^{13}\text{C}$  NMR spectra were obtained by using the same NMR spectrometers and were calibrated with  $\text{CDCl}_3$  ( $\delta = 77.16$  ppm). HRMS (ESI) data were obtained by Thermo Scientific LTQ Orbitrap Discovery mass spectrometer or Waters Xevo G2 QT of mass spectrometer.

### ***N*-Benzyl-2,3-*O*-isopropylidene-1,4-dideoxy-1,4-iminoerythritol (**13**)**

According to the method reported in the literature,<sup>1</sup> 2,3-*O*-isopropylidene-D-ribose (**11**) was prepared from D-ribose (15.0 g, 0.10 mol), dry acetone (180 mL), anhydrous  $\text{CuSO}_4$  (47.88 g, 0.30 mol) and sulfuric acid (0.45 mL). Yield: 12.41 g (65%).

To a solution of  $\text{NaIO}_4$  (10.95 g in 50 mL of  $\text{H}_2\text{O}$ , 51.2 mmol) at 0 °C, a solution of compound **11** (4.674 g in 10 mL of  $\text{H}_2\text{O}$ , 24.6 mmol) was added dropwise. The reaction mixture was stirred at 0 °C for 30 min and then kept at room temperature for another 4 h. After the disappearance of the starting material detected by TLC (petroleum ether/EtOAc = 1:2), the reaction mixture was directly concentrated under reduced pressure. The residue was diluted with EtOAc (150 mL) and then filtered through a celite pad. The filtrate was evaporated under vacuum to give a colorless oil **12**, which was used directly in the next step without further purification.

To a solution of activated 3Å molecular sieves,  $\text{NaBH}_3\text{CN}$  (6.18 g, 98.4 mmol) and anhydrous  $\text{ZnCl}_2$  (4.02 g, 29.5 mmol) containing 90 mL of anhydrous MeOH at 0 °C, a solution of **12** containing 10 mL of anhydrous MeOH was added dropwise, which was followed by the addition of a solution of  $\text{BnNH}_2$  (3.5 mL in 20 mL of anhydrous MeOH, 32.0 mmol). The reaction mixture was stirred at 0 °C for 30 min and then stirred at room temperature overnight. After the disappearance of the starting material detected by TLC (petroleum ether/EtOAc = 2:1), the reaction mixture was filtered through a celite pad, and then the solvent was evaporated under reduced pressure. The residue was diluted with 100 mL of ammonia water (1 M), and then extracted with EtOAc (50 mL $\times$ 4). The combined organic layer was washed with brine, dried over  $\text{Na}_2\text{SO}_4$  and concentrated under reduced pressure. The residue was purified by column chromatography on silica gel eluted with petroleum ether/acetone (12:1) to give compound **13** (4.88 g, 85% yield,  $R_f = 0.57$ , petroleum ether/acetone, 2:1, v/v) as a pale yellow oil.  $^1\text{H}$  NMR (400 MHz,  $\text{CDCl}_3$ ):  $\delta$  7.21-7.35 (m, 5H, ph), 4.63-4.66 (m, 2H, 2OCH), 3.62 (s, 2H, ph- $\text{CH}_2$ ), 3.04 (d,  $J = 11.6$  Hz, 2H, 2CHH), 2.14 (ddd,  $J = 11.4$  Hz,  $J = 3.0$  Hz,  $J = 1.3$  Hz, 2H, 2CHH), 1.57 (s, 3H,  $\text{CH}_3$ ), 1.32 (s, 3H,  $\text{CH}_3$ ). The  $^1\text{H}$  NMR data coincide with the previous report.<sup>2</sup>

### **2,3-*O*-Isopropylidene-1,4-dideoxy-1,4-iminoerythritol (**9**)**

A mixture of compound **13** (238.8 mg, 1.0 mmol) and  $\text{Pd}(\text{OH})_2/\text{C}$  (20% Pd, 450.0 mg) in dry THF (3.0 mL) was stirred under an atmosphere of 0.4 MPa  $\text{H}_2$  at room temperature for 2 days. After TLC ( $\text{CH}_2\text{Cl}_2/\text{MeOH}$  20:1) showed the complete consumption of **13** ( $R_f = 0.72$ ), the reaction mixture was filtered through a celite pad, then the filtrate was concentrated under reduced pressure to afford the compound **9** as a pale yellow oil.  $^1\text{H}$  NMR (400 MHz,  $\text{CDCl}_3$ ):  $\delta$  4.63-4.66 (m, 2H, 2OCH), 3.10 (d,  $J = 14$  Hz, 2H, 2CHHN), 2.52 (dd,  $J = 13.6$  Hz,  $J = 1.2$  Hz, 2H, 2CHHN), 2.19 (br s, 1H, NH), 1.45 (s, 3H,  $\text{CH}_3$ ), 1.32 (s, 3H,  $\text{CH}_3$ ). The  $^1\text{H}$  NMR data coincide with the

previous report.<sup>2</sup>

#### General procedure A for the synthesis of compounds **15j-15l**:

To a solution of alcohol (1.0 equiv.) in dry pyridine (8 mL) at 0 °C, diphenyl phosphite (3.0 equiv.) was added dropwise. The reaction mixture was stirred at room temperature for 1 h, which was followed by the addition of methanol (5.0 equiv.). After stirring for an additional 1 h, 2 N hydrochloric acid (60 mL) was added. The resulting solution was extracted with ethyl acetate (50 mL×3). The organic layer was washed with saturated brine, dried over anhydrous sodium sulfate, filtered, and evaporated. The residue was purified by column chromatography on silica gel eluted with petroleum ether/EtOAc to give the compounds **15j-15l**.

#### Methyl octyl phosphite (**15j**)

The reaction of *n*-octanol (0.50 mL, 3.17 mmol) with diphenyl phosphite (1.83 mL, 9.51 mmol) and methanol (0.64 mL, 15.85 mmol) was performed as described in the general procedure A, affording **15j** (0.61 g, 93% yield,  $R_f = 0.25$ , petroleum ether/EtOAc, 1:1, v/v) as a colorless oil. <sup>1</sup>H NMR (400 MHz, CDCl<sub>3</sub>): δ 7.66 (s, 0.5H, PH), 5.92 (s, 0.5H, PH), 4.05-4.11 (m, 2H, 2OCH<sub>2</sub>), 3.78 (d,  $J = 12$  Hz, 3H, 2OCH<sub>3</sub>), 1.66-1.73 (m, 2H, 2OCH<sub>2</sub>CH<sub>2</sub>), 1.28-1.40 (m, 10H, 5CH<sub>2</sub>), 0.88 (t,  $J = 6.8$  Hz, 6H, 2CH<sub>2</sub>CH<sub>3</sub>); <sup>13</sup>C NMR (101 MHz, CDCl<sub>3</sub>): δ 66.02, 65.96, 51.95, 51.90, 31.76, 30.46, 30.40, 29.16, 29.08, 25.49, 22.64, 14.09; <sup>31</sup>P NMR (162 MHz, CDCl<sub>3</sub>): δ 11.25, 6.96. HRMS (ESI) calcd. for C<sub>9</sub>H<sub>21</sub>O<sub>3</sub>P [M+Na]<sup>+</sup>: 231.1121, found: 231.1117.

#### Methyl nonyl phosphite (**15k**)

The reaction of *n*-nonanol (0.50 mL, 2.87 mmol) with diphenyl phosphite (1.65 mL, 8.60 mmol) and methanol (0.58 mL, 14.35 mmol) was performed as described in the general procedure A, affording **15k** (0.57 g, 90% yield,  $R_f = 0.27$ , petroleum ether/EtOAc, 1:1, v/v) as a colorless oil. <sup>1</sup>H NMR (400 MHz, CDCl<sub>3</sub>): 7.66 (s, 0.5H, PH), 5.92 (s, 0.5H, PH), 4.05-4.11 (m, 2H, 2OCH<sub>2</sub>), 3.77 (d,  $J = 12$  Hz, 3H, 2OCH<sub>3</sub>), 1.66-1.73 (m, 2H, 2OCH<sub>2</sub>CH<sub>2</sub>), 1.27-1.39 (m, 12H, 6CH<sub>2</sub>), 0.88 (t,  $J = 6.8$  Hz, 6H, 2CH<sub>2</sub>CH<sub>3</sub>); <sup>13</sup>C NMR (101 MHz, CDCl<sub>3</sub>): δ 66.12, 66.06, 52.01, 51.96, 31.93, 30.56, 30.50, 29.54, 29.29, 29.20, 25.58, 22.75, 14.17; <sup>31</sup>P NMR (162 MHz, CDCl<sub>3</sub>): δ 11.29, 7.00. HRMS (ESI) calcd for C<sub>10</sub>H<sub>23</sub>O<sub>3</sub>P [M+Na]<sup>+</sup>: 245.1277, found: 245.1274.

#### Methyl decyl phosphite (**15l**)

The reaction of *n*-decanol (0.50 mL, 2.87 mmol) with diphenyl phosphite (1.65 mL, 8.60 mmol) and methanol (0.64 mL, 15.85 mmol) was performed as described in the general procedure A, affording **15l** (0.55 g, 87% yield,  $R_f = 0.27$ , petroleum ether/EtOAc, 1:1, v/v) as a colorless oil. <sup>1</sup>H NMR (400 MHz, CDCl<sub>3</sub>): δ 7.66 (s, 0.5H, PH), 5.92 (s, 0.5H, PH), 4.05-4.11 (m, 2H, 2OCH<sub>2</sub>), 3.77 (d,  $J = 11.6$  Hz, 3H, 2OCH<sub>3</sub>), 1.66-1.73 (m, 2H, 2OCH<sub>2</sub>CH<sub>2</sub>), 1.27-1.39 (m, 14H, 7CH<sub>2</sub>), 0.88 (t,  $J = 6.8$  Hz, 6H, 2CH<sub>2</sub>CH<sub>3</sub>); <sup>13</sup>C NMR (101 MHz, CDCl<sub>3</sub>): δ 66.14, 66.08, 52.06, 52.00, 31.99, 30.57, 30.51, 29.61, 29.60, 29.40, 29.22, 25.59, 22.79, 14.22; <sup>31</sup>P NMR (162 MHz, CDCl<sub>3</sub>): δ 11.28, 6.99. HRMS (ESI) calcd for C<sub>11</sub>H<sub>25</sub>O<sub>3</sub>P [M+Na]<sup>+</sup>: 259.1434, found: 259.1429.

**General procedure B for the preparation of compounds **14b-h**:** To a stirred solution of alcohol (3.0 equiv.) in dry CH<sub>2</sub>Cl<sub>2</sub> (5 mL) at 0 °C under N<sub>2</sub>, a solution of phosphorus trichloride (3.0 equiv.) in dry CH<sub>2</sub>Cl<sub>2</sub> (2 mL) was added dropwise over a period of 30 min. Blowing air constantly, the reaction mixture was stirred at this temperature for 30 min, then allowed to warm up to room temperature for an additional 3 h. After a solution of trichloroisocyanuric acid (0.45 equiv. in 10 mL of dry CH<sub>3</sub>CN) was added dropwise at 0 °C, the resulting solution was allowed to warm up to room temperature and stirred overnight. The reaction mixture was filtered through a celite pad to remove cyanuric acid. The filtrate was concentrated under vacuum to afford the crude product **14b-l**.

**General procedure B for the preparation of compounds 14j-l:** To a solution of compound **15j-l** (1.0 equiv.) in dry CH<sub>3</sub>CN (0.5 mL) at 0 °C, a solution of trichloroisocyanuric acid (1.0 equiv. in 0.5 mL of dry CH<sub>3</sub>CN) was added dropwise. The resulting solution was allowed to warm up to room temperature and stirred overnight. The reaction mixture was filtered through a celite pad to remove cyanuric acid. The filtrate was concentrated under vacuum to afford the crude product **14j-l**.

**General procedure C for the synthesis of compounds 16a-16l:** To a mixture of compound **9** (1.0 equiv.) and DIPEA (5.0 equiv.) in THF (10 mL) at 0 °C, the compound **14a-l** (3.0 equiv.) in dry THF (2 mL) was added dropwise. After stirred at 0 °C for 30 min, the reaction mixture was stirred for an additional 4 h at room temperature. The resulting solution was filtered through a celite pad and then evaporated. The syrup was diluted with saturated NaHCO<sub>3</sub> (40 mL), and extracted with EtOAc (50 mL×4). The organic layer was washed with saturated brine, dried over anhydrous sodium sulfate, filtered, and evaporated. The residue was purified by column chromatography on silica gel eluted with petroleum ether/EtOAc to give the compound **16a-l**.

#### ***N*-Diethylphosphoryl-2,3-*O*-isopropylidene-1,4-dideoxy-1,4-iminoerythritol (16a)**

Compound **16a** was prepared from compound **9** starting from compound **13** (200.6 mg, 0.86 mmol), and **14a** (445.3 mg 2.58 mmol) as described in the general procedure C, affording **16a** (112.8 mg, 47% yield, two steps from compound **13**,  $R_f = 0.19$ , petroleum ether/acetone, 2:1, v/v) as a colorless oil. <sup>1</sup>H NMR (400 MHz, CDCl<sub>3</sub>): δ 4.68-4.70 (br m, 2H, 2OCH), 4.05-4.12 (m, 4H, 2OCH<sub>2</sub>CH<sub>3</sub>), 3.49 (dd,  $J = 12$  Hz,  $J = 2$  Hz, 2H, 2NCHHCH), 3.03 (d,  $J = 12$  Hz, 2H, 2NCHHCH), 1.47 (s, 3H, CCH<sub>3</sub>), 1.31-1.34 (m, 9H, 2CH<sub>2</sub>CH<sub>3</sub>, CCH<sub>3</sub>); <sup>13</sup>C NMR (101 MHz, CDCl<sub>3</sub>): δ 111.64, 80.26, 80.15, 62.53, 62.48, 52.98, 52.94, 26.31, 24.53, 16.35, 16.29; <sup>31</sup>P NMR (162 MHz, CDCl<sub>3</sub>): δ 6.38. HRMS (ESI) calcd for C<sub>11</sub>H<sub>22</sub>NO<sub>5</sub>P [M+H]<sup>+</sup>: 302.1128; found: 302.1123.

#### ***N*-Dibutylphosphoryl-2,3-*O*-isopropylidene-1,4-dideoxy-1,4-iminoerythritol (16b)**

Compound **16b** was prepared from compound **9** starting from compound **13** (233.2 mg 1.0 mmol), and the crude product **14b** (686 mg, 3.0 mmol) as described in the general procedure B and C, affording **16b** (173.0 mg, 52% yield, two steps from compound **13**,  $R_f = 0.20$ , petroleum ether/acetone, 2:1, v/v) as a colorless oil. <sup>1</sup>H NMR (400 MHz, CDCl<sub>3</sub>): δ 4.68-4.70 (br m, 2H, 2OCH), 3.95-4.06 (m, 4H, 2OCH<sub>2</sub>CH<sub>2</sub>), 3.46-3.50 (dd,  $J = 12$  Hz,  $J = 2$  Hz, 2H, 2NCHHCH), 3.01-3.04 (dd,  $J = 12$  Hz,  $J = 2.4$  Hz, 2H, 2NCHHCH), 1.62-1.69 (m, 4H, 2OCH<sub>2</sub>CH<sub>2</sub>), 1.47 (s, 3H, CCH<sub>3</sub>), 1.35-1.44 (m, 4H, 2CH<sub>2</sub>CH<sub>3</sub>), 1.31 (s, 3H, CCH<sub>3</sub>), 0.93 (t,  $J = 7.2$  Hz, 6H, 2CH<sub>2</sub>CH<sub>3</sub>); <sup>13</sup>C NMR (101 MHz, CDCl<sub>3</sub>): δ 111.73, 80.31, 80.04, 66.33, 66.28, 53.04, 53.00, 32.56, 32.49, 26.42, 24.61, 18.93, 13.79; <sup>31</sup>P NMR (162 MHz, CDCl<sub>3</sub>): δ 6.47. HRMS (ESI) calcd for C<sub>15</sub>H<sub>30</sub>NO<sub>5</sub>P [M+Na]<sup>+</sup>: 358.1754; found: 358.1748.

#### ***N*-Dihexylphosphoryl-2,3-*O*-isopropylidene-1,4-dideoxy-1,4-iminoerythritol (16c)**

Compound **16c** was prepared from compound **9** starting from compound **13** (137.2 mg, 0.59 mmol), and the crude product **14c** (513.2 mg, 1.80 mmol) as described in the general procedure B and C, affording **16c** (101.0 mg, 44% yield, two steps from compound **13**,  $R_f = 0.23$ , petroleum ether/acetone, 3:1, v/v) as a colorless oil. <sup>1</sup>H NMR (400 MHz, CDCl<sub>3</sub>): δ 4.69 (br s, 2H, 2OCH), 3.96-4.02 (m, 4H, 2OCH<sub>2</sub>CH<sub>2</sub>), 3.48 (dd,  $J = 12.4$  Hz,  $J = 2$  Hz, 2H, 2NCHHCH), 3.02 (d,  $J = 11.6$  Hz, 2H, 2NCHHCH), 1.63-1.70 (m, 4H, 2OCH<sub>2</sub>CH<sub>2</sub>), 1.47 (s, 3H, CCH<sub>3</sub>), 1.25-1.39 (m, 15H, 6CH<sub>2</sub>, CCH<sub>3</sub>), 0.89 (t,  $J = 6.8$  Hz, 6H, 2CH<sub>2</sub>CH<sub>3</sub>); <sup>13</sup>C NMR (101 MHz, CDCl<sub>3</sub>): δ 111.65, 80.26, 80.15, 66.60, 66.54, 52.99, 52.95, 31.48, 30.44, 30.37, 26.38, 25.32, 24.55, 22.65, 14.11; <sup>31</sup>P NMR (162 MHz, CDCl<sub>3</sub>): δ 6.46. HRMS (ESI) calcd for C<sub>19</sub>H<sub>38</sub>NO<sub>5</sub>P [M+Na]<sup>+</sup>: 414.2380; found: 414.2381.

#### ***N*-Diheptylphosphoryl-2,3-*O*-isopropylidene-1,4-dideoxy-1,4-iminoerythritol (16d)**

Compound **16d** was prepared from compound **9** starting from compound **13** (149.3 mg, 0.64 mmol), and the crude

product **14d** (600.5 mg, 1.92 mmol) as described in the general procedure B and C, affording **16d** (153.3 mg, 58% yield, two steps from compound **13**,  $R_f = 0.20$ , petroleum ether/ EtOAc, 1:1, v/v) as a colorless oil.  $^1\text{H}$  NMR (400 MHz,  $\text{CDCl}_3$ ):  $\delta$  4.68-4.69 (br m, 2H, 2OCH), 3.93-4.04 (m, 4H, 2OCH<sub>2</sub>CH<sub>2</sub>), 3.47 (d,  $J = 12$  Hz,  $J = 2$  Hz, 2H, 2NCHHCH), 3.02 (d,  $J = 11.2$  Hz, 2H, 2NCHHCH), 1.63-1.70 (m, 4H, 2OCH<sub>2</sub>CH<sub>2</sub>), 1.47 (s, 3H, CCH<sub>3</sub>), 1.28-1.32 (m, 19H, 8CH<sub>2</sub>, CCH<sub>3</sub>), 0.88 (t,  $J = 7.2$  Hz, 6H, 2CH<sub>2</sub>CH<sub>3</sub>);  $^{13}\text{C}$  NMR (101 MHz,  $\text{CDCl}_3$ ):  $\delta$  111.72, 80.30, 80.20, 66.65, 66.59, 53.03, 52.99, 31.87, 30.53, 30.46, 29.01, 26.44, 25.66, 24.62, 22.71, 14.19;  $^{31}\text{P}$  NMR (162 MHz,  $\text{CDCl}_3$ ):  $\delta$  6.46. HRMS (ESI) calcd for C<sub>21</sub>H<sub>43</sub>NO<sub>5</sub>P [M+H]<sup>+</sup>: 420.2879; found: 420.2874.

#### ***N*-Dioctylphosphoryl-2,3-*O*-isopropylidene-1,4-dideoxy-1,4-iminoerythritol (16e)**

Compound **16e** was prepared from compound **9** starting from compound **13** (126.0 mg, 0.54 mmol), and the crude product **14e** (552.3 mg, 1.62 mmol) as described in the general procedure B and C, affording **16e** (89.5 mg, 40% yield, two steps from compound **13**,  $R_f = 0.20$ , petroleum ether/ EtOAc, 1:1, v/v) as a colorless oil.  $^1\text{H}$  NMR (400 MHz,  $\text{CDCl}_3$ ):  $\delta$  4.66-4.69 (br m, 2H, 2OCH), 3.93-4.05 (m, 4H, 2OCH<sub>2</sub>CH<sub>2</sub>), 3.47 (dd,  $J = 12.4$  Hz,  $J = 2$  Hz, 2H, 2NCHHCH), 3.03 (d,  $J = 11.2$  Hz, 2H, 2NCHHCH), 1.63-1.69 (m, 4H, 2OCH<sub>2</sub>CH<sub>2</sub>), 1.47 (s, 3H, CCH<sub>3</sub>), 1.27-1.37 (m, 23H, 10CH<sub>2</sub>, CCH<sub>3</sub>), 0.88 (t,  $J = 6.8$  Hz, 6H, 2CH<sub>2</sub>CH<sub>3</sub>);  $^{13}\text{C}$  NMR (101 MHz,  $\text{CDCl}_3$ ):  $\delta$  111.74, 80.32, 80.21, 66.66, 66.61, 53.05, 53.01, 31.93, 30.55, 30.48, 29.34, 29.32, 26.46, 25.71, 24.64, 22.78, 14.23;  $^{31}\text{P}$  NMR (162 MHz,  $\text{CDCl}_3$ ):  $\delta$  6.46. HRMS (ESI) calcd for C<sub>23</sub>H<sub>46</sub>NO<sub>5</sub>P [M+Na]<sup>+</sup>: 470.3006; found: 470.3007.

#### ***N*-Dinonylphosphoryl-2,3-*O*-isopropylidene-1,4-dideoxy-1,4-iminoerythritol (16f)**

Compound **16f** was prepared from compound **9** starting from compound **13** (149.3 mg, 0.64 mmol), and the crude product **14f** (708.3 mg, 1.92 mmol) as described in the general procedure B and C, affording **16f** (150.3 mg, 50% yield, two steps from compound **13**,  $R_f = 0.30$ , petroleum ether/ EtOAc, 1:1, v/v) as a colorless oil.  $^1\text{H}$  NMR (400 MHz,  $\text{CDCl}_3$ ):  $\delta$  4.67-4.69 (br m, 2H, 2OCH), 3.93-4.04 (m, 4H, 2OCH<sub>2</sub>CH<sub>2</sub>), 3.47 (dd,  $J = 12$  Hz,  $J = 2$  Hz, 2H, 2NCHHCH), 3.03 (d,  $J = 11.2$  Hz, 2H, 2NCHHCH), 1.62-1.69 (m, 4H, 2OCH<sub>2</sub>CH<sub>2</sub>), 1.47 (s, 3H, CCH<sub>3</sub>), 1.27-1.33 (m, 23H, 10CH<sub>2</sub>, CCH<sub>3</sub>), 0.88 (t,  $J = 7.2$  Hz, 6H, 2CH<sub>2</sub>CH<sub>3</sub>);  $^{13}\text{C}$  NMR (101 MHz,  $\text{CDCl}_3$ ):  $\delta$  111.74, 80.32, 80.21, 66.66, 66.60, 53.05, 53.01, 32.00, 30.55, 30.48, 29.64, 29.37, 29.36, 26.47, 25.71, 24.64, 22.80, 14.23;  $^{31}\text{P}$  NMR (162 MHz,  $\text{CDCl}_3$ ):  $\delta$  6.46. HRMS (ESI) calcd for C<sub>25</sub>H<sub>50</sub>NO<sub>5</sub>P [M+H]<sup>+</sup>: 476.3499; found: 476.3512.

#### ***N*-Didecylphosphoryl-2,3-*O*-isopropylidene-1,4-dideoxy-1,4-iminoerythritol (16g)**

Compound **16g** was prepared from compound **9** starting from compound **13** (168.0 mg, 0.72 mmol), and the crude product **14g** (857.5 mg, 2.16 mmol) as described in the general procedure B and C, affording **16g** (176.7 mg, 49% yield, two steps from compound **13**,  $R_f = 0.30$ , petroleum ether/ EtOAc, 1:1, v/v) as a colorless oil.  $^1\text{H}$  NMR (400 MHz,  $\text{CDCl}_3$ ):  $\delta$  4.69 (br s, 2H, 2OCH), 3.95-4.03 (m, 4H, 2OCH<sub>2</sub>CH<sub>2</sub>), 3.47 (dd,  $J = 12$  Hz,  $J = 2$  Hz, 2H, 2NCHHCH), 3.03 (d,  $J = 11.6$  Hz, 2H, 2NCHHCH), 1.62-1.69 (m, 4H, 2OCH<sub>2</sub>CH<sub>2</sub>), 1.47 (s, 3H, CCH<sub>3</sub>), 1.26-1.34 (m, 31H, 14CH<sub>2</sub>, CCH<sub>3</sub>), 0.88 (t,  $J = 6.8$  Hz, 6H, 2CH<sub>2</sub>CH<sub>3</sub>);  $^{13}\text{C}$  NMR (101 MHz,  $\text{CDCl}_3$ ):  $\delta$  111.74, 80.32, 80.21, 66.65, 66.59, 53.04, 53.01, 32.03, 30.55, 30.48, 29.68, 29.44, 29.35, 26.46, 25.71, 24.63, 22.82, 14.24;  $^{31}\text{P}$  NMR (162 MHz,  $\text{CDCl}_3$ ):  $\delta$  6.45. HRMS (ESI) calcd for C<sub>27</sub>H<sub>54</sub>NO<sub>5</sub>P [M+Na]<sup>+</sup>: 526.3632; found: 526.3611.

#### ***N*-Didodecylphosphoryl-2,3-*O*-isopropylidene-1,4-dideoxy-1,4-iminoerythritol (16h)**

Compound **16h** was prepared from compound **9** starting from compound **13** (149.3 mg, 0.64 mmol), and the crude product **14h** (870.0 mg, 1.92 mmol) as described in the general procedure B and C, affording **16h** (125.8 mg, 35% yield, two steps, two steps from compound **13**,  $R_f = 0.25$ , petroleum ether/ EtOAc, 1:1, v/v) as a colorless oil.  $^1\text{H}$

NMR (400 MHz, CDCl<sub>3</sub>): δ 4.67-4.69 (br m, 2H, 2OCH), 3.95-4.03 (m, 4H, 2OCH<sub>2</sub>CH<sub>2</sub>), 3.48 (dd, *J* = 12 Hz, *J* = 2 Hz, 2H, 2NCHHCH), 3.02 (d, *J* = 11.2 Hz, 2H, 2NCHHCH), 1.62-1.69 (m, 4H, 2OCH<sub>2</sub>CH<sub>2</sub>), 1.47 (s, 3H, CCH<sub>3</sub>), 1.26-1.31 (m, 39H, 18CH<sub>2</sub>, CCH<sub>3</sub>), 0.88 (t, *J* = 6.8 Hz, 6H, 2CH<sub>2</sub>CH<sub>3</sub>); <sup>13</sup>C NMR (101 MHz, CDCl<sub>3</sub>): δ 111.71, 80.30, 80.19, 66.63, 66.57, 52.03, 52.99, 32.05, 30.53, 30.46, 29.77, 29.71, 29.68, 29.48, 29.34, 26.44, 25.70, 24.61, 22.82, 14.24; <sup>31</sup>P NMR (162 MHz, CDCl<sub>3</sub>): δ 6.45. HRMS (ESI) calcd for C<sub>31</sub>H<sub>63</sub>NO<sub>5</sub>P [M+H]<sup>+</sup>: 560.4444; found: 560.4438.

***N*-Diphenylphosphoryl-2,3-*O*-isopropylidene-1,4-dideoxy-1,4-iminoerythritol (16i)**

Compound **16i** was prepared from compound **9** starting from compound **13** (153.2 mg, 0.66 mmol), and **14i** (531.8 mg, 1.98 mmol) as described in the general procedure C, affording **16i** (156.9 mg, 64% yield, two steps, two steps from compound **13**, *R<sub>f</sub>* = 0.23, petroleum ether/acetone, 1:1, v/v) as a colorless oil. <sup>1</sup>H NMR (400 MHz, CDCl<sub>3</sub>): δ 7.13-7.34 (m, 10H, 2ph), 4.69-4.71 (br m, 2H, 2OCH), 3.71 (dd, *J* = 12.4 Hz, *J* = 2.8 Hz, 2H, 2NCHHCH), 3.17 (m, 2H, 2NCHHCH), 1.30 (s, 3H, CCH<sub>3</sub>), 1.28 (s, 3H, CCH<sub>3</sub>); <sup>13</sup>C NMR (101 MHz, CDCl<sub>3</sub>): δ 151.01, 150.94, 129.81, 125.04, 120.37, 120.32, 111.99, 80.17, 80.06, 53.41, 53.37, 26.13, 24.58; <sup>31</sup>P NMR (162 MHz, CDCl<sub>3</sub>): δ -3.39. HRMS (ESI) calcd for C<sub>19</sub>H<sub>22</sub>NO<sub>5</sub>P [M+Na]<sup>+</sup>: 398.1128; found: 398.1122.

***N*-(Methyl-octyl-phosphoryl)-2,3-*O*-isopropylidene-1,4-dideoxy-1,4-iminoerythritol (16j)**

Compound **16i** was prepared from compound **9** starting from compound **13** (59.4 mg, 0.24 mmol), and **15j** (79.1 mg, 0.38 mmol) as described in the general procedure B and C, affording **16j** (42.9 mg, 51% yield, two steps from compound **13**, *R<sub>f</sub>* = 0.18, petroleum ether/ EtOAc, 1:3, v/v) as a colorless oil. <sup>1</sup>H NMR (400 MHz, CDCl<sub>3</sub>): δ 4.68-4.70 (br m, 2H, 2OCH), 3.96-4.04 (m, 2H, OCH<sub>2</sub>CH<sub>2</sub>), 3.72 (d, *J* = 10.8 Hz, 3H, OCH<sub>3</sub>), 3.46-3.51 (m, 2H, 2NCHHCH), 3.03 (d, *J* = 12 Hz, 2H, 2NCHHCH), 1.62-1.69 (m, 2H, 2OCH<sub>2</sub>CH<sub>2</sub>), 1.48 (s, 3H, CCH<sub>3</sub>), 1.27-1.37 (m, 13H, 5CH<sub>2</sub>, CCH<sub>3</sub>), 0.88 (t, *J* = 6.8 Hz, 3H, CH<sub>2</sub>CH<sub>3</sub>); <sup>13</sup>C NMR (101 MHz, CDCl<sub>3</sub>): δ 111.75, 80.30, 80.20, 66.82, 66.76, 53.04, 53.01, 31.91, 30.52, 30.46, 29.32, 29.29, 26.42, 25.67, 24.58, 22.77, 14.22; <sup>31</sup>P NMR (162 MHz, CDCl<sub>3</sub>): δ 7.65. HRMS (ESI) calcd for C<sub>16</sub>H<sub>32</sub>NO<sub>5</sub>P [M+H]<sup>+</sup>: 350.2091; found: 350.2096.

***N*-(Methyl-nonyl-phosphoryl)-2,3-*O*-isopropylidene-1,4-dideoxy-1,4-iminoerythritol (16k)**

Compound **16k** was prepared from compound **9** starting from compound **13** (32.7 mg, 0.14 mmol), and **15k** (46.7 mg, 0.21 mmol) as described in the general procedure B and C, affording **16k** (25.2 mg, 50% yield, two steps from compound **13**, *R<sub>f</sub>* = 0.22, petroleum ether/EtOAc, 1:3, v/v) as a colorless oil. <sup>1</sup>H NMR (400 MHz, CDCl<sub>3</sub>): δ 4.69-4.70 (br m, 2H, 2OCH), 3.97-4.03 (m, 2H, OCH<sub>2</sub>CH<sub>2</sub>), 3.72 (d, *J* = 11.2 Hz, 3H, OCH<sub>3</sub>), 3.46-3.51 (m, 2H, 2NCHHCH), 3.03 (d, *J* = 11.6 Hz, 2H, 2NCHHCH), 1.63-1.70 (m, 2H, 2OCH<sub>2</sub>CH<sub>2</sub>), 1.48 (s, 3H, CCH<sub>3</sub>), 1.27-1.33 (m, 15H, 6CH<sub>2</sub>, CCH<sub>3</sub>), 0.88 (t, *J* = 6.8 Hz, 3H, CH<sub>2</sub>CH<sub>3</sub>); <sup>13</sup>C NMR (101 MHz, CDCl<sub>3</sub>): δ 111.74, 80.30, 80.19, 66.82, 66.76, 53.24, 53.18, 53.04, 53.01, 52.97, 31.99, 30.53, 30.46, 29.62, 29.36, 29.34, 26.42, 25.67, 24.58, 22.84, 14.24; <sup>31</sup>P NMR (162 MHz, CDCl<sub>3</sub>): δ 8.42. HRMS (ESI) calcd for C<sub>17</sub>H<sub>34</sub>NO<sub>5</sub>P [M+H]<sup>+</sup>: 364.2247; found: 364.2257.

***N*-(Methyl-decyl-phosphoryl)-2,3-*O*-isopropylidene-1,4-dideoxy-1,4-iminoerythritol (16l)**

Compound **16l** was prepared from compound **9** starting from compound **13** (151.6 mg, 0.65 mmol), and **15l** (231.6 mg, 0.98 mmol) as described in the general procedure B and C, affording **16l** (97.9 mg, 40% yield, two steps from compound **13**, *R<sub>f</sub>* = 0.29, petroleum ether/EtOAc, 1:3, v/v) as a colorless oil. <sup>1</sup>H NMR (400 MHz, CDCl<sub>3</sub>): δ 4.68-4.70 (br m, 2H, 2OCH), 3.96-4.03 (m, 2H, OCH<sub>2</sub>CH<sub>2</sub>), 3.72 (d, *J* = 11.2 Hz, 3H, OCH<sub>3</sub>), 3.46-3.51 (m, 2H, 2NCHHCH), 3.03 (d, *J* = 12 Hz, 2H, 2NCHHCH), 1.62-1.70 (m, 2H, 2OCH<sub>2</sub>CH<sub>2</sub>), 1.47 (s, 3H, CCH<sub>3</sub>), 1.26-1.35 (m, 15H, 6CH<sub>2</sub>, CCH<sub>3</sub>), 0.88 (t, *J* = 6.8 Hz, 3H, CH<sub>2</sub>CH<sub>3</sub>); <sup>13</sup>C NMR (101 MHz, CDCl<sub>3</sub>): δ 111.75, 80.31, 80.20,

66.81, 66.76, 53.23, 53.17, 53.05, 53.01, 52.98, 32.03, 30.53, 30.46, 29.68, 29.44, 29.34, 26.43, 25.68, 24.59, 22.82, 14.25; <sup>31</sup>P NMR (162 MHz, CDCl<sub>3</sub>): δ 8.43. HRMS (ESI) calcd for C<sub>18</sub>H<sub>36</sub>NO<sub>5</sub>P [M+H]<sup>+</sup>: 378.2404; found: 378.2413.

#### General procedure D for the preparation of compounds 8a-8l:

The compound **16a-l** was dissolved in 85% AcOH (2.0 mL) under N<sub>2</sub>. The resulting solution was stirred at 80 °C for 2-4 h until the reaction was complete. The reaction mixture was concentrated under reduced pressure. The residue was purified by column chromatography on silica gel eluted with CH<sub>2</sub>Cl<sub>2</sub>/MeOH to give the compound **8a-l**.

#### Diethyl ((3S,4R)-3,4-dihydroxypyrrolidin-1-yl)phosphonate (8a)

Compound **8a** was prepared from compound **16a** (82.0 mg, 0.29 mmol) as described in the general procedure D, affording **8a** (24.3 mg, 35% yield, R<sub>f</sub> = 0.18, CH<sub>2</sub>Cl<sub>2</sub>/MeOH, 10:1, v/v) as a colorless oil. <sup>1</sup>H NMR (400 MHz, CDCl<sub>3</sub>): δ 4.23-4.24 (br m, 2H, 2OCH), 4.01-4.11 (m, 4H, 2OCH<sub>2</sub>CH<sub>2</sub>), 3.40-3.45 (m, 2H, 2NCHHCH), 3.17-3.23 (m, 4H, 2NCHHCH, 2OH), 1.32 (t, J = 6.8 Hz, 6H, 2CH<sub>2</sub>CH<sub>3</sub>); <sup>13</sup>C NMR (101 MHz, CDCl<sub>3</sub>): δ 71.83, 71.74, 62.67, 62.61, 51.53, 51.50, 16.38, 16.31; <sup>31</sup>P NMR (162 MHz, CDCl<sub>3</sub>): δ 7.09. HRMS (ESI) calcd for C<sub>8</sub>H<sub>18</sub>NO<sub>5</sub>P [M+H]<sup>+</sup>: 240.0995; found: 240.0992.

#### Dibutyl ((3S,4R)-3,4-dihydroxypyrrolidin-1-yl)phosphonate (8b)

Compound **8b** was prepared from compound **16b** (27.2 mg, 0.08 mmol) as described in the general procedure D, affording **8b** (10.6 mg, 45% yield, R<sub>f</sub> = 0.18, CH<sub>2</sub>Cl<sub>2</sub>/MeOH, 10:1, v/v) as a colorless oil. <sup>1</sup>H NMR (400 MHz, CDCl<sub>3</sub>): δ 4.21-4.22 (br m, 2H, 2OCH), 3.93-4.01 (m, 4H, 2OCH<sub>2</sub>CH<sub>2</sub>), 3.65-3.66 (br m, 2H, 2OH), 3.38-3.43 (m, 2H, 2NCHHCH), 3.16-3.21 (m, 2H, 2NCHHCH), 1.61-1.68 (m, 4H, 2OCH<sub>2</sub>CH<sub>2</sub>), 1.35-1.45 (m, 4H, 2CH<sub>2</sub>CH<sub>3</sub>), 0.93 (t, J = 7.2 Hz, 6H, 2CH<sub>2</sub>CH<sub>3</sub>); <sup>13</sup>C NMR (101 MHz, CDCl<sub>3</sub>): δ 71.77, 71.68, 66.44, 66.38, 51.52, 51.49, 32.51, 32.44, 18.93, 13.79; <sup>31</sup>P NMR (162 MHz, CDCl<sub>3</sub>): δ 7.24. HRMS (ESI) calcd for C<sub>12</sub>H<sub>26</sub>NO<sub>5</sub>P [M+Na]<sup>+</sup>: 318.1441; found: 318.1446.

#### Dihexyl ((3S,4R)-3,4-dihydroxypyrrolidin-1-yl)phosphonate (8c)

Compound **8c** was prepared from compound **16c** (65.1 mg, 0.17 mmol) as described in the general procedure D, affording **8c** (29.5 mg, 51% yield, R<sub>f</sub> = 0.33, CH<sub>2</sub>Cl<sub>2</sub>/MeOH, 15:1, v/v) as a colorless oil. <sup>1</sup>H NMR (400 MHz, CDCl<sub>3</sub>): δ 4.24 (br s, 2H, 2OCH), 3.93-4.02 (m, 4H, 2OCH<sub>2</sub>CH<sub>2</sub>), 3.42-3.47 (m, 2H, 2NCHHCH), 3.17-3.22 (m, 2H, 2NCHHCH), 2.57 (br s, 2H, 2OH), 1.62-1.69 (m, 4H, 2OCH<sub>2</sub>CH<sub>2</sub>), 1.25-1.40 (m, 12H, 6CH<sub>2</sub>), 0.89 (t, J = 6.8 Hz, 6H, 2CH<sub>2</sub>CH<sub>3</sub>); <sup>13</sup>C NMR (101 MHz, CDCl<sub>3</sub>): δ 71.74, 71.65, 66.75, 66.70, 51.50, 51.47, 31.49, 30.46, 30.39, 25.36, 22.67, 14.14; <sup>31</sup>P NMR (162 MHz, CDCl<sub>3</sub>): δ 7.22. HRMS (ESI) calcd for C<sub>16</sub>H<sub>34</sub>NO<sub>5</sub>P [M+H]<sup>+</sup>: 352.2247; found: 352.2249.

#### Diheptyl ((3S,4R)-3,4-dihydroxypyrrolidin-1-yl)phosphonate (8d)

Compound **8d** was prepared from compound **16d** (98.7 mg, 0.24 mmol) as described in the general procedure D, affording **8d** (35.4 mg, 40% yield, R<sub>f</sub> = 0.19, petroleum ether/acetone, 1:1, v/v) as a colorless oil. <sup>1</sup>H NMR (400 MHz, CDCl<sub>3</sub>): δ 4.22 (br s, 2H, 2OCH), 3.90-4.02 (m, 4H, 2OCH<sub>2</sub>CH<sub>2</sub>), 3.39-3.44 (m, 2H, 2NCHHCH), 3.32 (br s, 2H, 2OH), 3.17-3.22 (m, 2H, 2NCHHCH), 1.62-1.69 (m, 4H, 2OCH<sub>2</sub>CH<sub>2</sub>), 1.28-1.32 (m, 16H, 8CH<sub>2</sub>), 0.88 (t, J = 6.8 Hz, 6H, 2CH<sub>2</sub>CH<sub>3</sub>); <sup>13</sup>C NMR (101 MHz, CDCl<sub>3</sub>): δ 71.82, 71.73, 66.78, 66.72, 51.62, 51.58, 31.87, 30.54, 30.48, 29.01, 25.68, 22.72, 14.20; <sup>31</sup>P NMR (162 MHz, CDCl<sub>3</sub>): δ 7.27. HRMS (ESI) calcd for C<sub>18</sub>H<sub>38</sub>NO<sub>5</sub>P [M+H]<sup>+</sup>: 380.2566; found: 380.2566.

**Diocetyl ((3S,4R)-3,4-dihydroxypyrrolidin-1-yl)phosphonate (8e)**

Compound **8e** was prepared from compound **16e** (46.0 mg, 0.10 mmol) as described in the general procedure D, affording **8e** (13.0 mg, 31% yield,  $R_f = 0.23$ ,  $\text{CH}_2\text{Cl}_2/\text{MeOH}$ , 15:1, v/v) as a colorless oil.  $^1\text{H}$  NMR (400 MHz,  $\text{CDCl}_3$ ):  $\delta$  4.21 (br s, 2H,  $2\text{OCH}$ ), 3.90-4.01 (m, 4H,  $2\text{OCH}_2\text{CH}_2$ ), 3.57 (br s, 2H,  $2\text{OH}$ ), 3.38-3.43 (m, 2H,  $2\text{NCHHCH}$ ), 3.17-3.21 (m, 2H,  $2\text{NCHHCH}$ ), 1.62-1.69 (m, 4H,  $2\text{OCH}_2\text{CH}_2$ ), 1.27-1.32 (m, 20H,  $10\text{CH}_2$ ), 0.88 (t,  $J = 6.8$  Hz, 6H,  $2\text{CH}_2\text{CH}_3$ );  $^{13}\text{C}$  NMR (101 MHz,  $\text{CDCl}_3$ ):  $\delta$  71.83, 71.74, 66.76, 66.71, 51.58, 51.55, 31.93, 30.53, 30.46, 29.34, 29.31, 25.72, 22.78, 14.24;  $^{31}\text{P}$  NMR (162 MHz,  $\text{CDCl}_3$ ):  $\delta$  7.30. HRMS (ESI) calcd for  $\text{C}_{20}\text{H}_{42}\text{NO}_5\text{P}$   $[\text{M}+\text{H}]^+$ : 408.2873; found: 408.2884.

**Dinonyl ((3S,4R)-3,4-dihydroxypyrrolidin-1-yl)phosphonate (8f)**

Compound **8f** was prepared from compound **16f** (45.8 mg, 0.08 mmol) as described in the general procedure D, affording **8f** (16.1 mg, 49% yield,  $R_f = 0.33$ ,  $\text{CH}_2\text{Cl}_2/\text{MeOH}$ , 15:1, v/v) as a colorless oil.  $^1\text{H}$  NMR (400 MHz,  $\text{CDCl}_3$ ):  $\delta$  4.22-4.23 (br m, 2H,  $2\text{OCH}$ ), 3.91-4.02 (m, 4H,  $2\text{OCH}_2\text{CH}_2$ ), 3.40-3.45 (m, 2H,  $2\text{NCHHCH}$ ), 3.17-3.22 (m, 2H,  $2\text{NCHHCH}$ ), 2.90 (br s, 2H,  $2\text{OH}$ ), 1.62-1.67 (m, 4H,  $2\text{OCH}_2\text{CH}_2$ ), 1.27-1.37 (m, 20H,  $12\text{CH}_2$ ), 0.88 (t,  $J = 6.8$  Hz, 6H,  $2\text{CH}_2\text{CH}_3$ );  $^{13}\text{C}$  NMR (101 MHz,  $\text{CDCl}_3$ ):  $\delta$  71.88, 71.80, 66.79, 66.73, 51.65, 51.61, 32.00, 30.56, 30.49, 29.65, 29.39, 29.36, 25.73, 22.81, 14.25;  $^{31}\text{P}$  NMR (162 MHz,  $\text{CDCl}_3$ ):  $\delta$  7.35. HRMS (ESI) calcd for  $\text{C}_{22}\text{H}_{46}\text{NO}_5\text{P}$   $[\text{M}+\text{H}]^+$ : 436.3186; found: 436.3201.

**Didecyl ((3S,4R)-3,4-dihydroxypyrrolidin-1-yl)phosphonate (8g)**

Compound **8g** was prepared from compound **16g** (31.2 mg, 0.06 mmol) as described in the general procedure D, affording **8g** (15.4 mg, 54% yield,  $R_f = 0.20$ ,  $\text{CH}_2\text{Cl}_2/\text{MeOH}$ , 20:1, v/v) as a colorless oil.  $^1\text{H}$  NMR (400 MHz,  $\text{CDCl}_3$ ):  $\delta$  4.25 (m, 2H,  $2\text{OCH}$ ), 3.92-4.02 (m, 4H,  $2\text{OCH}_2\text{CH}_2$ ), 3.67 (br s, 2H,  $2\text{OH}$ ), 3.38-3.43 (m, 2H,  $2\text{NCHHCH}$ ), 3.19-3.24 (m, 2H,  $2\text{NCHHCH}$ ), 1.62-1.69 (m, 4H,  $2\text{OCH}_2\text{CH}_2$ ), 1.26-1.34 (m, 28H,  $14\text{CH}_2$ ), 0.88 (t,  $J = 6.8$  Hz, 6H,  $2\text{CH}_2\text{CH}_3$ );  $^{13}\text{C}$  NMR (101 MHz,  $\text{CDCl}_3$ ):  $\delta$  71.85, 71.76, 66.91, 66.85, 51.66, 51.63, 32.04, 30.55, 30.48, 29.71, 29.46, 29.38, 25.74, 22.83, 14.26;  $^{31}\text{P}$  NMR (162 MHz,  $\text{CDCl}_3$ ):  $\delta$  7.28. HRMS (ESI) calcd for  $\text{C}_{24}\text{H}_{50}\text{NO}_5\text{P}$   $[\text{M}+\text{H}]^+$ : 464.3499, found: 464.3502.

**Didodecyl ((3S,4R)-3,4-dihydroxypyrrolidin-1-yl)phosphonate (8h)**

Compound **8h** was prepared from compound **16h** (87.7 mg, 0.16 mmol) as described in the general procedure D, affording **8h** (32.4 mg, 40% yield,  $R_f = 0.18$ ,  $\text{CH}_2\text{Cl}_2/\text{MeOH}$ , 20:1, v/v) as a pale yellow solid. M.p. 42-43 °C.  $^1\text{H}$  NMR (400 MHz,  $\text{CDCl}_3$ ):  $\delta$  4.21 (br s, 2H,  $2\text{OCH}$ ), 3.91-4.01 (m, 4H,  $2\text{OCH}_2\text{CH}_2$ ), 3.56 (br s, 2H,  $2\text{OH}$ ), 3.38-3.43 (m, 4H,  $2\text{NCHHCH}$ ), 3.17-3.21 (m, 2H,  $2\text{NCHHCH}$ ), 1.63-1.67 (m, 4H,  $2\text{OCH}_2\text{CH}_2$ ), 1.26-1.34 (m, 36H,  $18\text{CH}_2$ ), 0.88 (t,  $J = 6.8$  Hz, 6H,  $2\text{CH}_2\text{CH}_3$ );  $^{13}\text{C}$  NMR (101 MHz,  $\text{CDCl}_3$ ):  $\delta$  71.74, 71.65, 66.78, 66.72, 51.53, 51.50, 32.05, 30.55, 30.48, 29.79, 29.77, 29.74, 29.69, 29.48, 29.37, 25.73, 22.81, 14.22;  $^{31}\text{P}$  NMR (162 MHz,  $\text{CDCl}_3$ ):  $\delta$  7.28. HRMS (ESI) calcd for  $\text{C}_{28}\text{H}_{58}\text{NO}_5\text{P}$   $[\text{M}+\text{H}]^+$ : 520.4131, found: 520.4123.

**Diphenyl ((3S,4R)-3,4-dihydroxypyrrolidin-1-yl)phosphonate (8i)**

Compound **8i** was prepared from compound **16i** (35.4 mg, 0.09 mmol) as described in the general procedure D, affording **8i** (24.2 mg, 77% yield,  $R_f = 0.35$ ,  $\text{CH}_2\text{Cl}_2/\text{MeOH}$ , 15:1, v/v) as a white solid. M.p. 113-114 °C.  $^1\text{H}$  NMR (400 MHz,  $\text{CDCl}_3$ ): 7.15-7.36 (m, 10H, 2ph), 4.15-4.16 (br s, 2H,  $2\text{OCH}$ ), 3.53-3.58 (m, 2H,  $2\text{NCHHCH}$ ), 3.29-3.33 (m, 2H,  $2\text{NCHHCH}$ ), 2.61 (br s, 2H,  $2\text{OH}$ );  $^{13}\text{C}$  NMR (101 MHz,  $\text{CDCl}_3$ ):  $\delta$  150.73, 150.66, 129.92, 125.27, 120.26, 120.21, 71.41, 71.30, 51.61, 51.57;  $^{31}\text{P}$  NMR (162 MHz,  $\text{CDCl}_3$ ):  $\delta$  -3.04. HRMS (ESI) calcd for  $\text{C}_{16}\text{H}_{18}\text{NO}_5\text{P}$   $[\text{M}+\text{H}]^+$ : 336.0995, found: 336.1001.



#### **Methyl-octyl-((3S,4R)-3,4-dihydroxypyrrolidin-1-yl)phosphonate (8j)**

Compound **8j** was prepared from compound **16j** (20.2 mg, 0.058 mmol) as described in the general procedure D, affording **8j** (9.8 mg, 55% yield,  $R_f = 0.39$ ,  $\text{CH}_2\text{Cl}_2/\text{MeOH}$ , 7:1, v/v) as a colorless oil.  $^1\text{H}$  NMR (400 MHz,  $\text{CDCl}_3$ ):  $\delta$  4.23 (br s, 2H, 2OCH), 3.93-4.01 (m, 2H, 2OCH<sub>2</sub>CH<sub>2</sub>), 3.70 (d,  $J = 10.8$  Hz, 3H, OCH<sub>3</sub>), 3.39-3.45 (m, 2H, 2NCHHCH), 3.17-3.23 (m, 4H, 2NCHHCH, 2OH), 1.62-1.69 (m, 2H, OCH<sub>2</sub>CH<sub>2</sub>), 1.28-1.35 (m, 10H, 5CH<sub>2</sub>), 0.88 (t,  $J = 6.8$  Hz, 3H, CH<sub>2</sub>CH<sub>3</sub>);  $^{13}\text{C}$  NMR (101 MHz,  $\text{CDCl}_3$ ):  $\delta$  71.85, 71.83, 71.76, 71.74, 66.92, 66.86, 53.25, 53.19, 51.62, 51.58, 51.54, 51.51, 31.92, 30.54, 30.47, 29.32, 29.29, 25.70, 22.77, 14.21;  $^{31}\text{P}$  NMR (162 MHz,  $\text{CDCl}_3$ ):  $\delta$  9.19. HRMS (ESI) calcd for  $\text{C}_{13}\text{H}_{28}\text{NO}_5\text{P}$   $[\text{M}+\text{H}]^+$ : 310.1783, found: 310.1788.

#### **Methyl-nonyl-((3S,4R)-3,4-dihydroxypyrrolidin-1-yl)phosphonate (8k)**

Compound **8k** was prepared from compound **16k** (26.3 mg, 0.072 mmol) as described in the general procedure D, affording **8k** (10.1 mg, 43% yield,  $R_f = 0.44$ ,  $\text{CH}_2\text{Cl}_2/\text{MeOH}$ , 7:1, v/v) as a colorless oil.  $^1\text{H}$  NMR (400 MHz,  $\text{CDCl}_3$ ):  $\delta$  4.23 (br s, 2H, 2OCH), 3.93-4.01 (m, 2H, 2OCH<sub>2</sub>CH<sub>2</sub>), 3.70 (d,  $J = 11.2$  Hz, 3H, OCH<sub>3</sub>), 3.39-3.45 (m, 2H, 2NCHHCH), 3.17-3.23 (m, 4H, 2NCHHCH, 2OH), 1.62-1.69 (m, 2H, OCH<sub>2</sub>CH<sub>2</sub>), 1.27-1.33 (m, 12H, 6CH<sub>2</sub>), 0.88 (t,  $J = 6.8$  Hz, 3H, CH<sub>2</sub>CH<sub>3</sub>);  $^{13}\text{C}$  NMR (101 MHz,  $\text{CDCl}_3$ ):  $\delta$  71.83, 71.81, 71.74, 71.72, 66.92, 66.86, 53.26, 53.20, 51.59, 51.56, 51.52, 51.48, 31.99, 30.53, 30.46, 29.62, 29.37, 29.34, 25.69, 22.80, 14.24;  $^{31}\text{P}$  NMR (162 MHz,  $\text{CDCl}_3$ ):  $\delta$  8.43. HRMS (ESI) calcd for  $\text{C}_{14}\text{H}_{30}\text{NO}_5\text{P}$   $[\text{M}+\text{Na}]^+$ : 346.1754, found: 346.1761.

#### **Methyl-decyl-((3S,4R)-3,4-dihydroxypyrrolidin-1-yl)phosphonate (8l)**

Compound **8l** was prepared from compound **16l** (15.0 mg, 0.040 mmol) as described in the general procedure D, affording **8l** (7.2 mg, 53% yield,  $R_f = 0.29$ ,  $\text{CH}_2\text{Cl}_2/\text{MeOH}$ , 10:1, v/v) as a colorless oil.  $^1\text{H}$  NMR (400 MHz,  $\text{CDCl}_3$ ):  $\delta$  4.24 (br s, 2H, 2OCH), 3.93-4.02 (m, 2H, 2OCH<sub>2</sub>CH<sub>2</sub>), 3.70 (d,  $J = 10.8$  Hz, 3H, OCH<sub>3</sub>), 3.39-3.42 (m, 2H, 2NCHHCH), 3.18-3.22 (m, 2H, 2NCHHCH), 2.84 (m, 2H, 2OH), 1.61-1.68 (m, 2H, OCH<sub>2</sub>CH<sub>2</sub>), 1.26 (br m, 14H, 7CH<sub>2</sub>), 0.88 (t,  $J = 6.4$  Hz, 3H, CH<sub>2</sub>CH<sub>3</sub>);  $^{13}\text{C}$  NMR (101 MHz,  $\text{CDCl}_3$ ):  $\delta$  71.85, 71.83, 71.76, 71.74, 66.91, 66.85, 53.25, 53.20, 51.61, 51.57, 51.54, 51.50, 32.03, 30.54, 30.47, 29.67, 29.44, 29.34, 25.70, 22.82, 14.25;  $^{31}\text{P}$  NMR (162 MHz,  $\text{CDCl}_3$ ):  $\delta$  9.19. HRMS (ESI) calcd for  $\text{C}_{15}\text{H}_{32}\text{NO}_5\text{P}$   $[\text{M}+\text{H}]^+$ : 338.2091, found: 338.2014.

### **Biology Section**

All experiments were performed in compliance with the relevant laws and institutional guidelines, and were approved by the Ethics Committee of Peking University Health Science Center.

#### **Mouse-Splenocyte-Proliferation-Inhibition Assay**

Male BALB/c mouse splenocytes ( $5 \times 10^5$  cells per well), which had been pretreated with Con A (Sigma) (5  $\mu\text{g}/\text{mL}$ ) and each compound (30  $\mu\text{M}$ ), were incubated at 37 °C for 48 h under 5% CO<sub>2</sub> in a RPMI-1640 medium (Hyclone) that contained 10% fetal bovine serum (Hyclone). CCK-8 (10  $\mu\text{L}$ , Dojindo) was added to each well and the plates were further incubated for 3 h at 37 °C. The optical density was measured by using a Microplate Reader (Tecan) at 450 nm. The IC<sub>50</sub> values were determined from the results of three independent experiments and calculated from the inhibition curves.

#### **Mouse-Cytokine-Secretion-Inhibition Assay**

Male BALB/c mouse splenocytes were pretreated with Con A (5  $\mu\text{g}/\text{mL}$ ) and each compound (30  $\mu\text{M}$ ) in 5% CO<sub>2</sub> at 37 °C. After 48 h, the supernatant was collected and stored at -20 °C. The concentration of IL-4 or IFN- $\gamma$  was

detected with instant ELISA kits (eBioscience). The 96-well plates were precoated with the capture antibody of IFN- $\gamma$  or IL-4 and blotted. Then, the standards and the detecting samples were added to the appropriate wells. The plates were covered and incubated at room temperature for 2 h until the addition of detection antibody and Avilin-HRP. The wells were washed with PBST after each step above. Finally, the substrate solution was added to each well for 15 min. The reaction was stopped and read at 450 nm. The density of IFN- $\gamma$  or IL-4 in the samples was determined according to the standard curve.

## References:

1 P. Srihari, B. Kumaraswamy and J. S. Yadav, *Tetrahedron*, 2009, **65**, 6304-6309.

2 T. M. Chapman, S. Courtney, P. Hay and B. G. Davis, *Chem. Eur. J.*, 2003, **9**, 3397-3414.

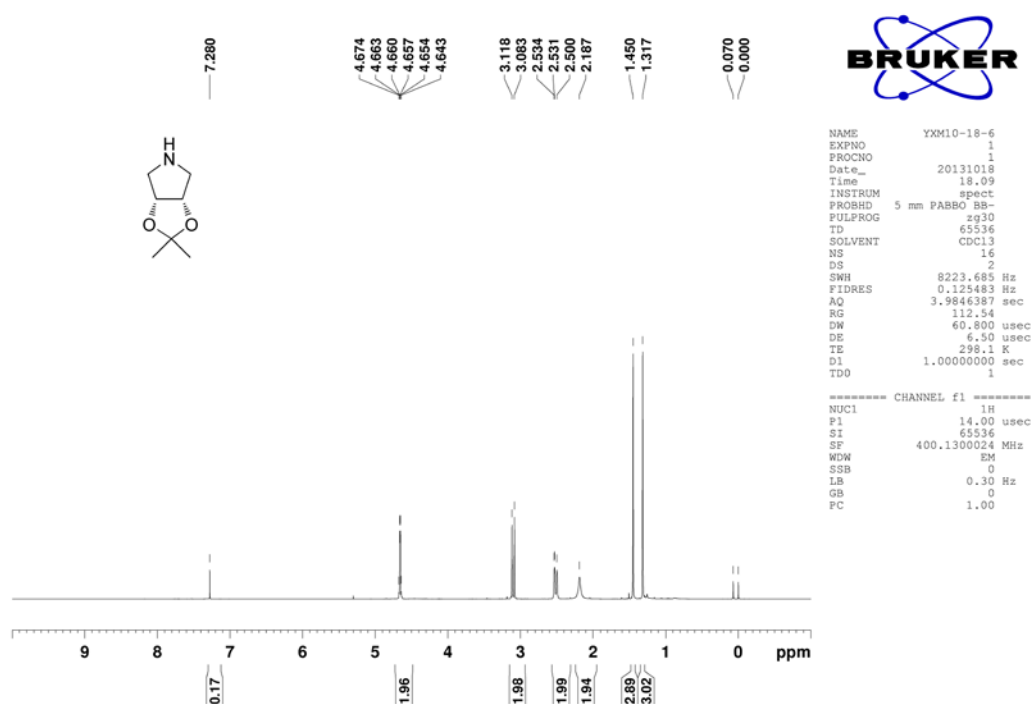

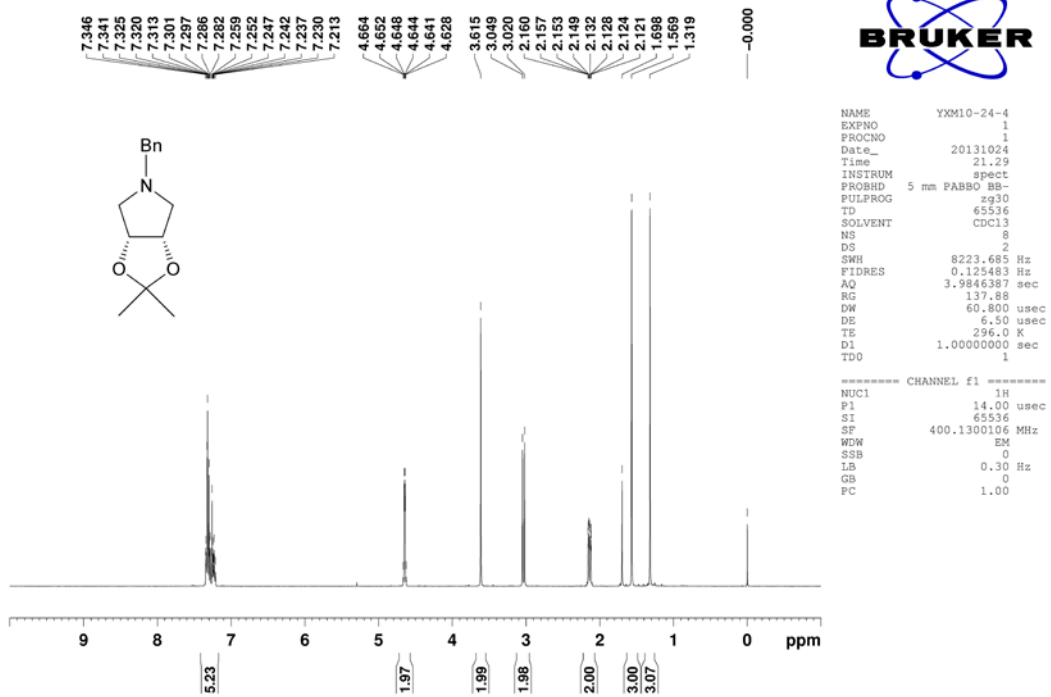

<sup>1</sup>H NMR Spectrum of Compound 13

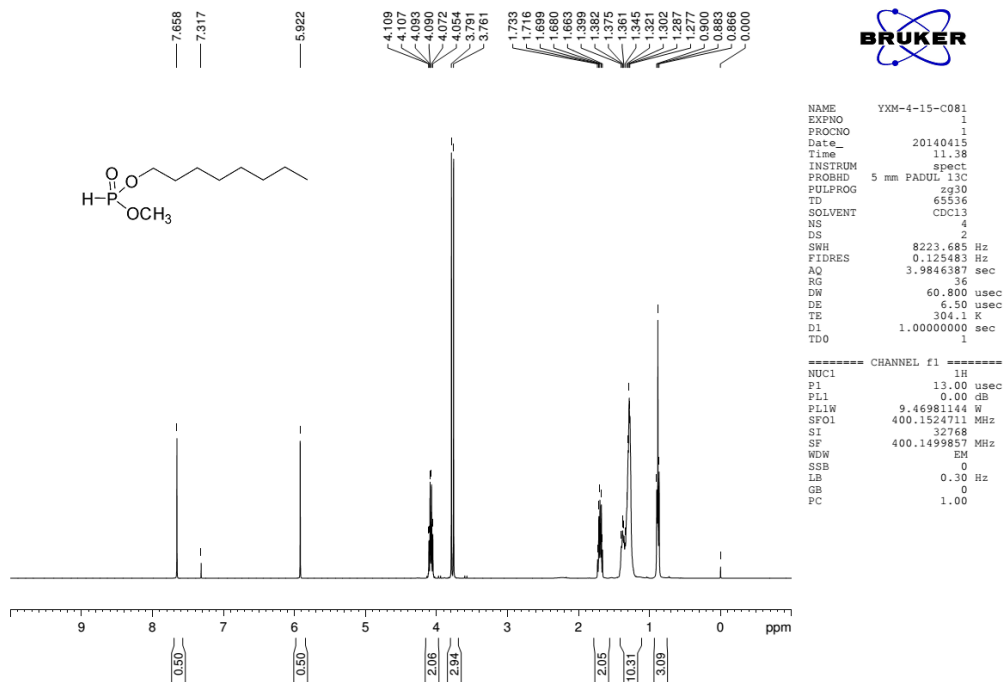

<sup>1</sup>H NMR Spectrum of Compound 15j

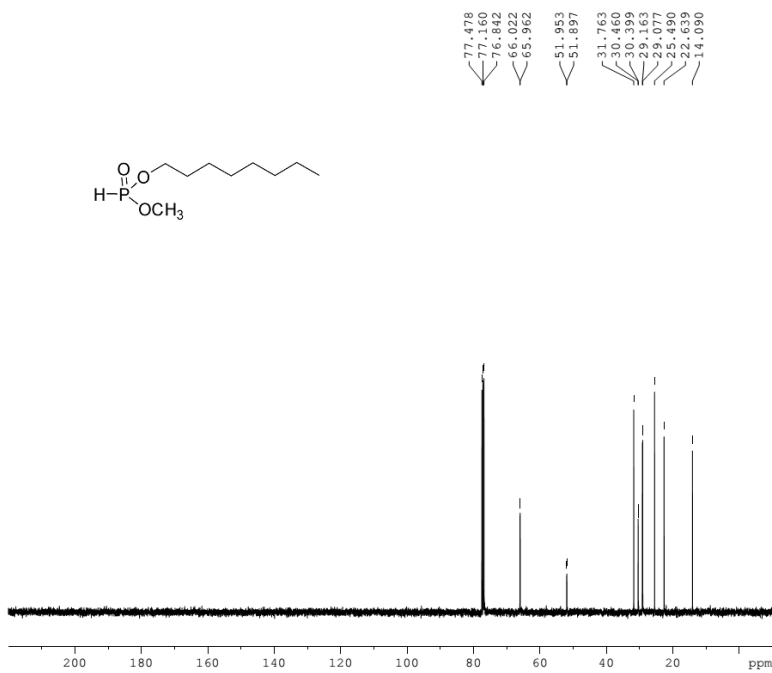

```

NAME      YXM-4-15-C081
EXPNO     2
PROCNO    1
Date_     20140415
Time      11.41
INSTRUM   spect
PROBHD    5 mm PADUL 13C
PULPROG   zgpg30
TD         65536
SOLVENT   CDCl3
NS         4
DS         4
SWH       28409.092 Hz
FIDRES    0.433488 Hz
AQ        1.1534836 sec
RG         2050
DW        17.600 usec
DE        6.50 usec
TE        304.2 K
D1        1.25000000 sec
D11       0.03000000 sec
TDO       1

```

```

===== CHANNEL f1 =====
NUC1      13C
P1        9.50 usec
PL1       0.00 dB
PL1W      35.66878891 W
SFO1      100.6288660 MHz

```

```

===== CHANNEL f2 =====
CPDPRG2   waltz16
NUC2      1H
PCPD2     60.00 usec
PL2       0.00 dB
PL12      13.28 dB
PL13      13.05 dB
PL2W      9.46981144 W
PL12W     0.44498092 W
PL13W     0.46918198 W
SFO2      400.1516006 MHz
SI        32768
SF        100.6177905 MHz
WDW       EM
SSB       0
LB        1.00 Hz
GB        0
PC        1.40

```

<sup>13</sup>C NMR Spectrum of Compound 15j

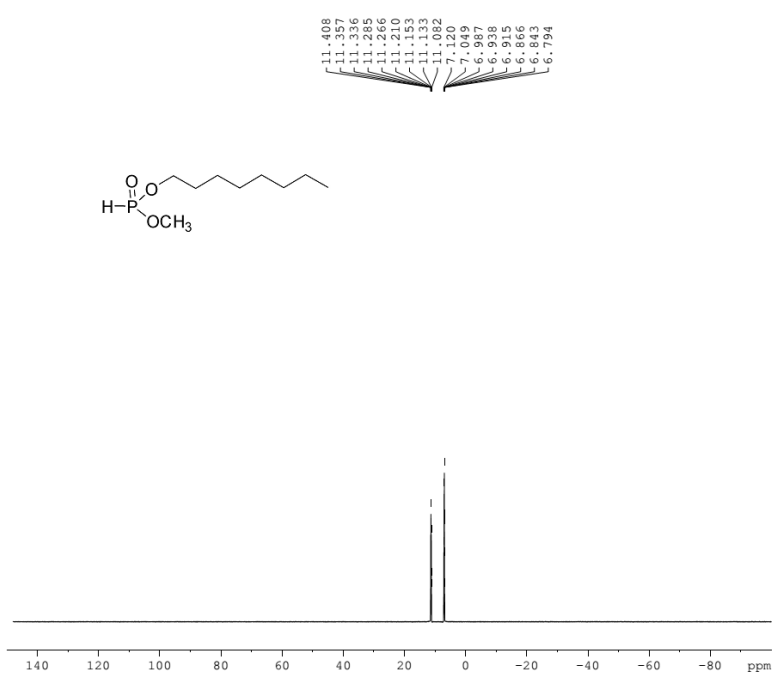

```

NAME      YXM-4-15-C0812
EXPNO     1
PROCNO    1
Date_     20140415
Time      21.11
INSTRUM   spect
PROBHD    5 mm PABBO BB-
PULPROG   zg30
TD         65536
SOLVENT   CDCl3
NS         32
DS         4
SWH       64102.563 Hz
FIDRES    0.978127 Hz
AQ        0.5112308 sec
RG         205.82
DW        7.800 usec
DE        6.50 usec
TE        297.1 K
D1        2.00000000 sec
TDO       1

```

```

===== CHANNEL f1 =====
NUC1      31P
P1        14.00 usec
SI        32768
SF        161.9755930 MHz
WDW       EM
SSB       0
LB        1.00 Hz
GB        0
PC        1.40

```

<sup>31</sup>P NMR Spectrum of Compound 15j

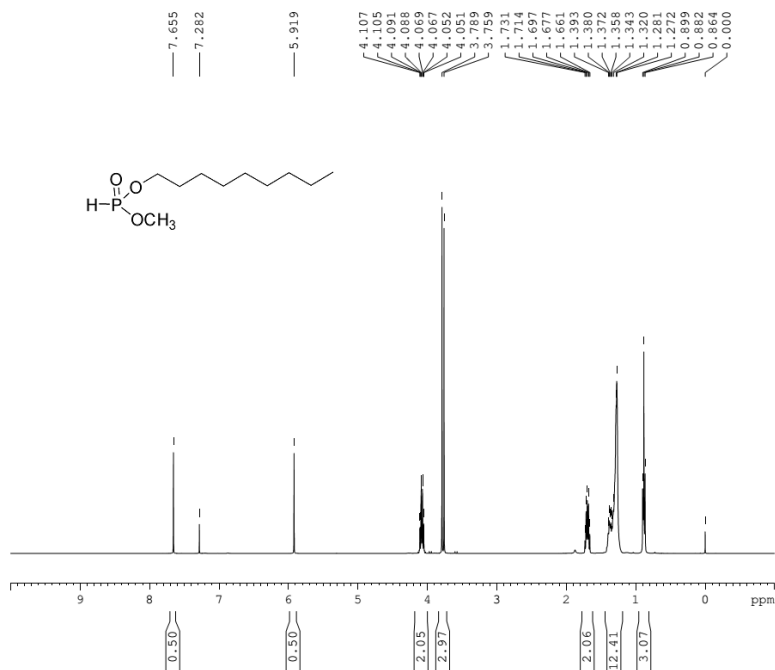

<sup>1</sup>H NMR Spectrum of Compound 15k

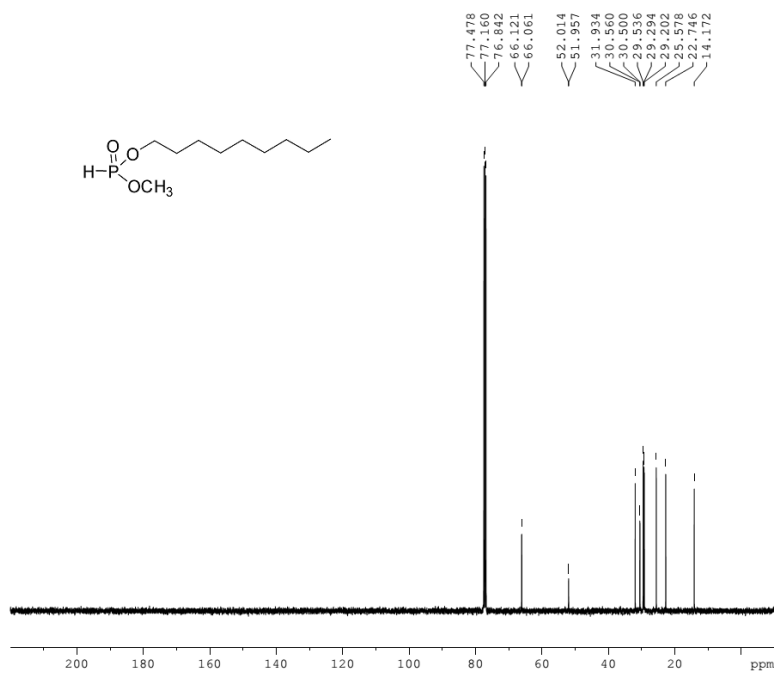

<sup>13</sup>C NMR Spectrum of Compound 15k

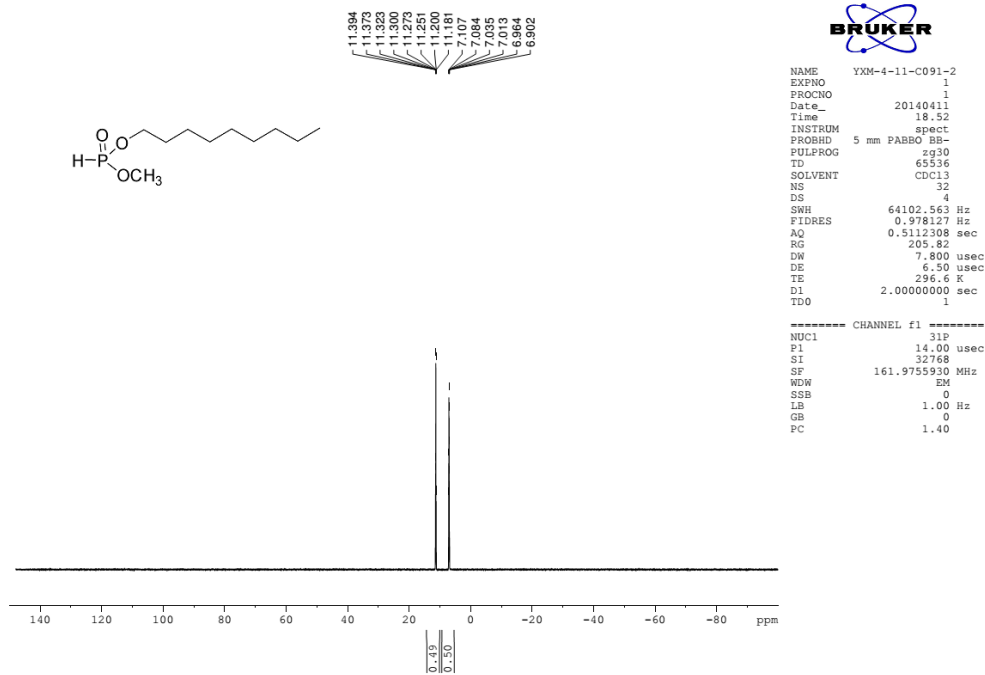

<sup>31</sup>P NMR Spectrum of Compound 15k

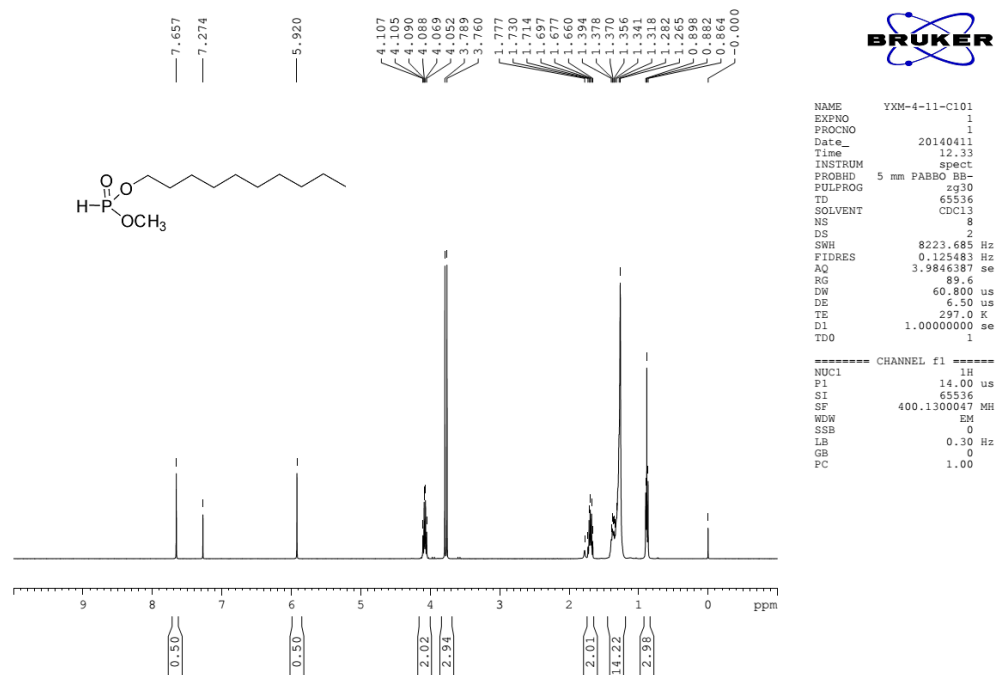

<sup>1</sup>H NMR Spectrum of Compound 15l

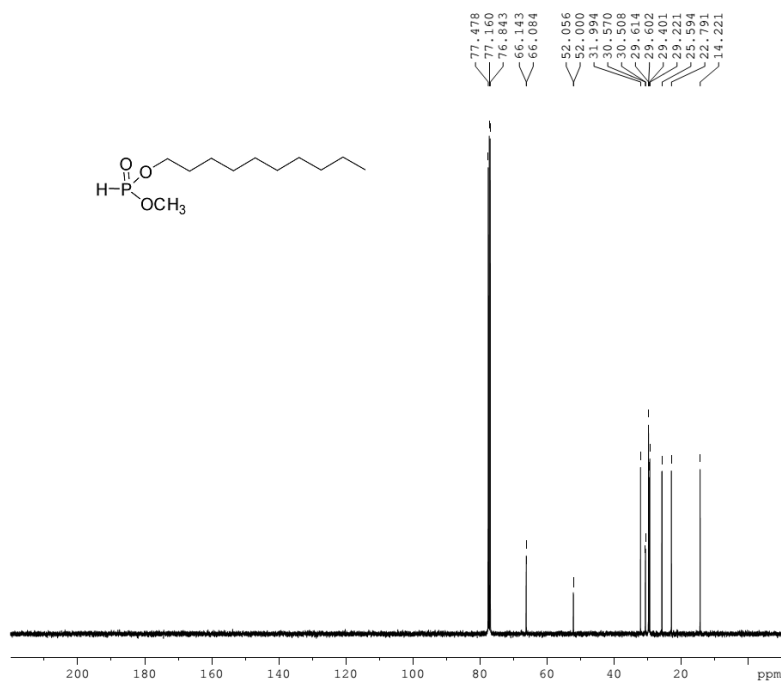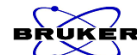

```

NAME      YXM-4-11-C101
EXPNO     2
PROCNO    1
Date_     20140411
Time      12.56
INSTRUM   spect
PROBHD    5 mm PABBO BB-
PULPROG   zgpg30
TD         65536
SOLVENT   CDCl3
NS         500
DS         4
SWH        26041.666 Hz
FIDRES     0.397364 Hz
AQ         1.2583412 sec
RG         205.82
DW         19.200 usec
DE         6.50 usec
TE         298.3 K
D1         1.25000000 sec
D11        0.03000000 sec
TDO        1
  
```

```

----- CHANNEL f1 -----
NUC1      13C
P1         9.00 usec
SI        32768
SF        100.6127556 MHz
WDW        EM
SSB        0
LB         1.00 Hz
GB         0
PC         1.40
  
```

<sup>13</sup>C NMR Spectrum of Compound 15I

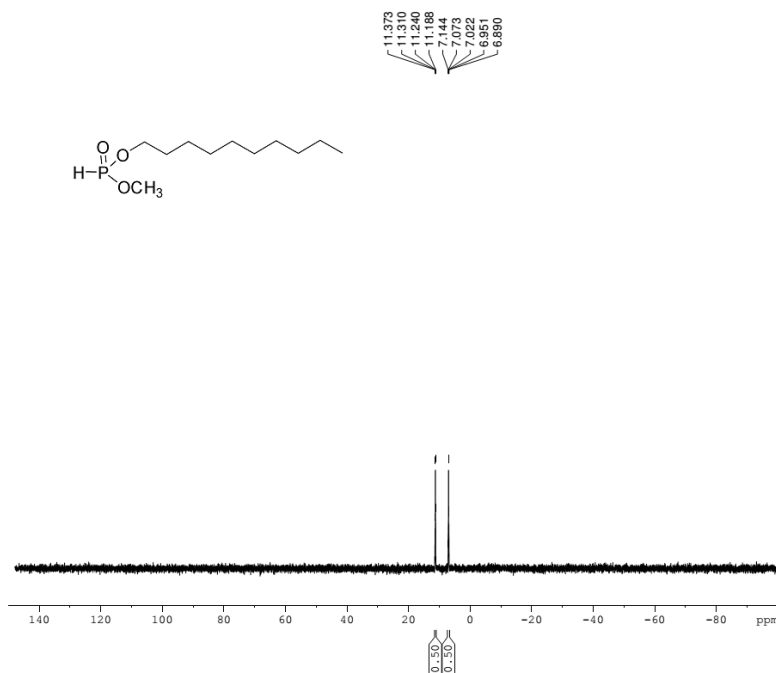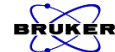

```

NAME      YXM-4-8-2
EXPNO     2
PROCNO    1
Date_     20140409
Time      19.15
INSTRUM   spect
PROBHD    5 mm PABBO BB-
PULPROG   zg30
TD         65536
SOLVENT   CDCl3
NS         1
DS         4
SWH        64102.563 Hz
FIDRES     0.978127 Hz
AQ         0.5112308 sec
RG         205.82
DW         7.800 usec
DE         6.50 usec
TE         298.5 K
D1         2.00000000 sec
TDO        1
  
```

```

----- CHANNEL f1 -----
NUC1      31P
P1        14.00 usec
SI        32768
SF        161.9755930 MHz
WDW        EM
SSB        0
LB         1.00 Hz
GB         0
PC         1.40
  
```

<sup>31</sup>P NMR Spectrum of Compound 15I

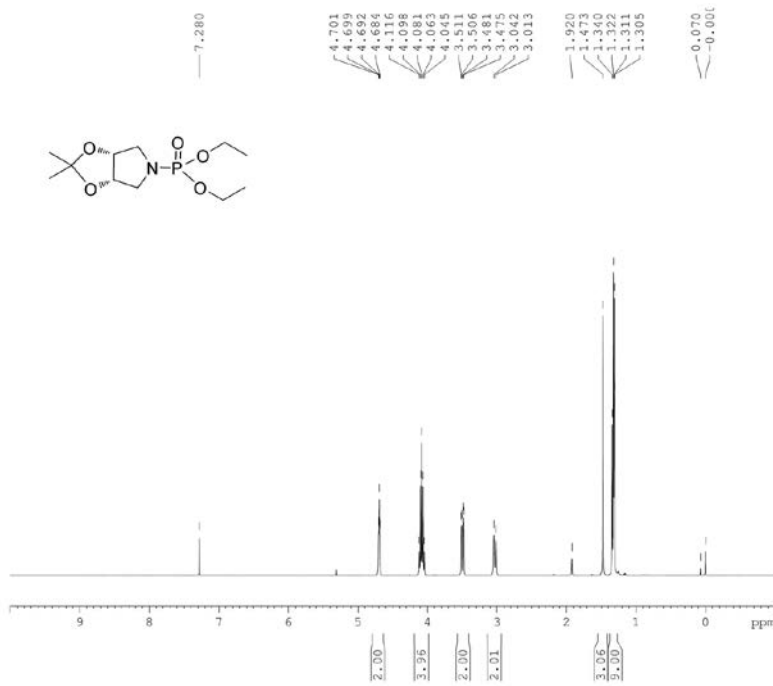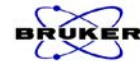

```

NAME      YXM-12-23-C2
EXPNO     1
PROCNO    1
Date_     20131223
Time      17.28
INSTRUM   spect
PROBHD    5 mm PABBO BB-
PULPROG   zg30
TD         65536
SOLVENT   CDCl3
NS         16
DS         2
SWH        8223.685 Hz
FIDRES     0.125483 Hz
AQ         3.9846387 se
RG         112.54
DW         50.800 us
DE         6.50 us
TE         291.9 K
D1         1.00000000 se
TDO        1
  
```

```

===== CHANNEL f1 =====
NUC1      1H
P1         14.00 us
SI         65536
SF         400.1300021 MHz
WDW        EM
SSB        0
LB         0.30 Hz
GB         0
PC         1.00
  
```

<sup>1</sup>H NMR Spectrum of Compound 16a

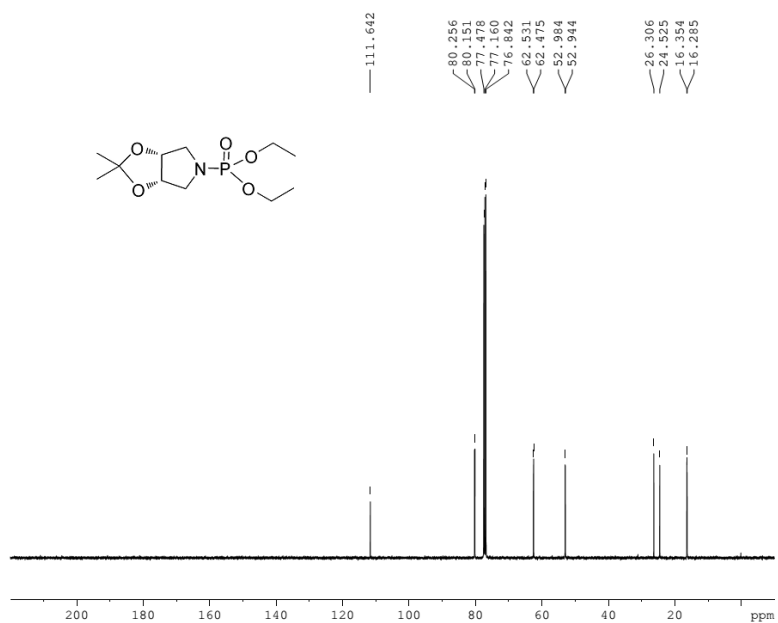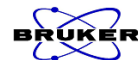

```

NAME      yxm-12-23-c2-1
EXPNO     3
PROCNO    1
Date_     20131224
Time      1.02
INSTRUM   spect
PROBHD    5 mm PABBO BB-
PULPROG   zgpg30
TD         65536
SOLVENT   CDCl3
NS         1024
DS         4
SWH        26041.666 Hz
FIDRES     0.397364 Hz
AQ         1.2583412 se
RG         205.82
DW         19.200 us
DE         6.50 us
TE         293.8 K
D1         1.25000000 se
D11        0.03000000 se
TDO        1
  
```

```

===== CHANNEL f1 =====
NUC1      13C
P1         9.00 us
SI         32768
SF         100.6127573 MHz
WDW        EM
SSB        0
LB         1.00 Hz
GB         0
PC         1.40
  
```

<sup>13</sup>C NMR Spectrum of Compound 16a



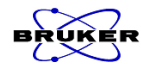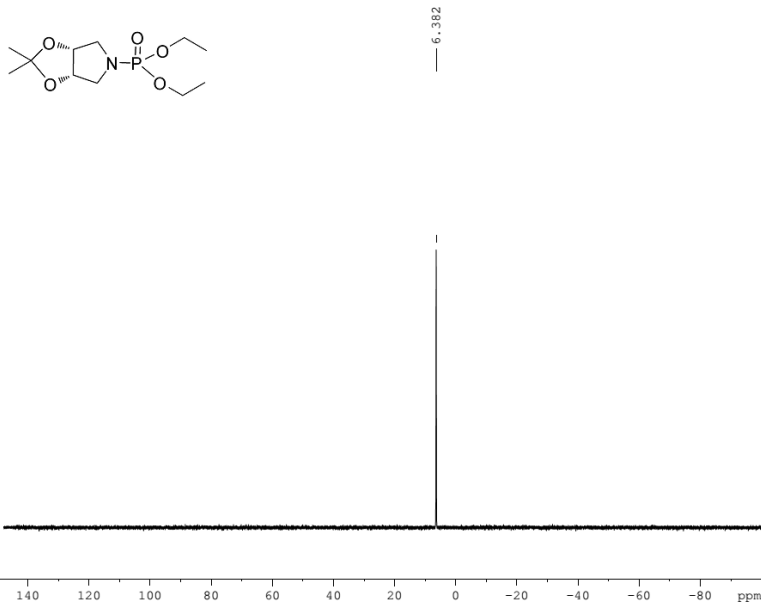

```
NAME yxm-12-23-c2-1
EXPNO 2
PROCNO 1
Date_ 20131224
Time 0.12
INSTRUM spect
PROBHD 5 mm PABBO BB-
PULPROG zg30
TD 65536
SOLVENT CDC13
NS 32
DS 4
SWH 64102.563 Hz
FIDRES 0.978127 Hz
AQ 0.5112308 sec
RG 205.82
DW 7.800 usec
DE 6.50 usec
TE 292.2 K
D1 2.00000000 sec
TDO 1
----- CHANNEL f1 -----
NUC1 31P
P1 14.00 usec
SI 32768
SF 161.9755930 MHz
WDW EM
SSB 0
LB 1.00 Hz
GB 0
PC 1.40
```

<sup>31</sup>P NMR Spectrum of Compound 16a

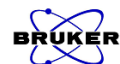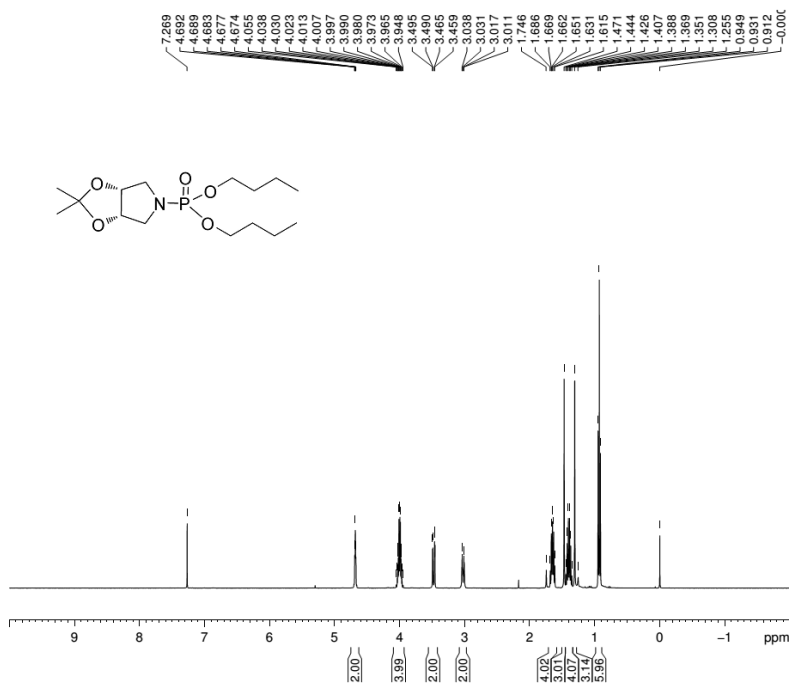

```
NAME YXM-11-30-4
EXPNO 2
PROCNO 1
Date_ 20131110
Time 23.03
INSTRUM spect
PROBHD 5 mm PABBO BB-
PULPROG zg30
TD 65536
SOLVENT CDC13
NS 8
DS 2
SWH 8223.685 Hz
FIDRES 0.125483 Hz
AQ 3.9846387 sec
RG 137.88
DW 60.800 usec
DE 6.50 usec
TE 298.3 K
D1 1.00000000 sec
TDO 1
----- CHANNEL f1 -----
NUC1 1H
P1 14.00 usec
SI 65536
SF 400.1300067 MHz
WDW EM
SSB 0
LB 0.30 Hz
GB 0
PC 1.00
```

<sup>1</sup>H NMR Spectrum of Compound 16b

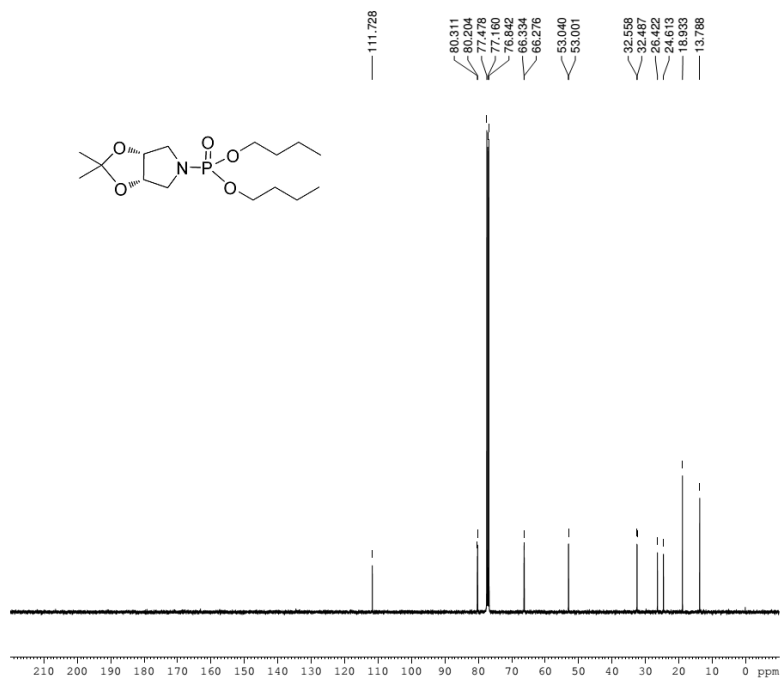

**BRUKER**

```

NAME      YXM-11-30-4
EXPNO    4
PROCNO   1
Date_    20131130
Time     23.51
INSTRUM  spect
PROBHD   5 mm PABBO BB-
PULPROG  zgpg30
TD       65536
SOLVENT  CDCl3
NS       1024
DS       4
SWH      26041.666 Hz
FIDRES   0.397364 Hz
AQ       1.2583412 sec
RG       205.82
DW       19.200 usec
DE       6.50 usec
TE       300.2 K
D1       1.25000000 sec
D11      0.03000000 sec
TDO     1
----- CHANNEL f1 -----
NUC1     13C
P1       9.00 usec
SI       32768
SF       100.6127544 MHz
WDW      EM
SSB      0
LB       1.00 Hz
GB       0
PC       1.40

```

<sup>13</sup>C NMR Spectrum of Compound 16b

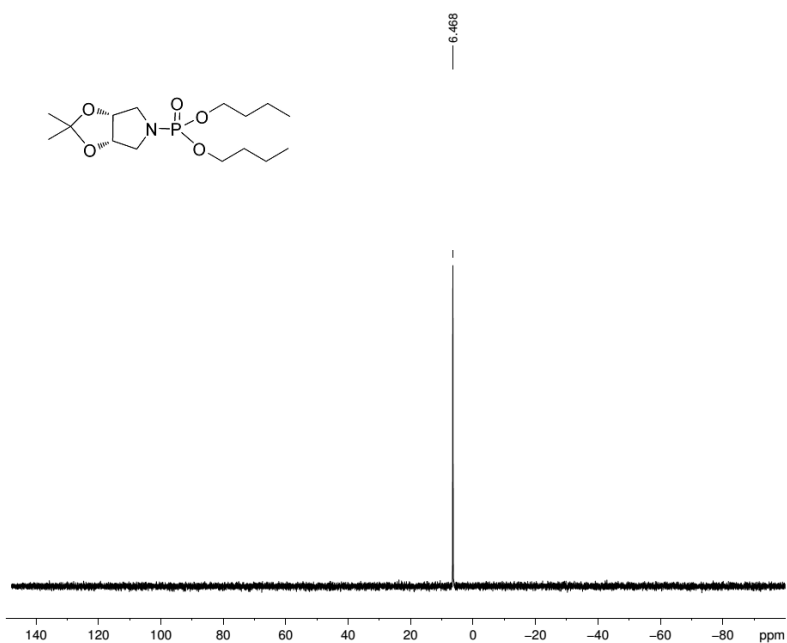

**BRUKER**

```

NAME      YXM-11-30-4
EXPNO    3
PROCNO   1
Date_    20131130
Time     23.06
INSTRUM  spect
PROBHD   5 mm PABBO BB-
PULPROG  zg30
TD       65536
SOLVENT  CDCl3
NS       32
DS       4
SWH      64102.563 Hz
FIDRES   0.978127 Hz
AQ       0.5112308 sec
RG       205.82
DW       7.800 usec
DE       6.50 usec
TE       298.3 K
D1       2.00000000 sec
TDO     1
----- CHANNEL f1 -----
NUC1     31P
P1       14.00 usec
SI       32768
SF       161.9755930 MHz
WDW      EM
SSB      0
LB       1.00 Hz
GB       0
PC       1.40

```

<sup>31</sup>P NMR Spectrum of Compound 16b

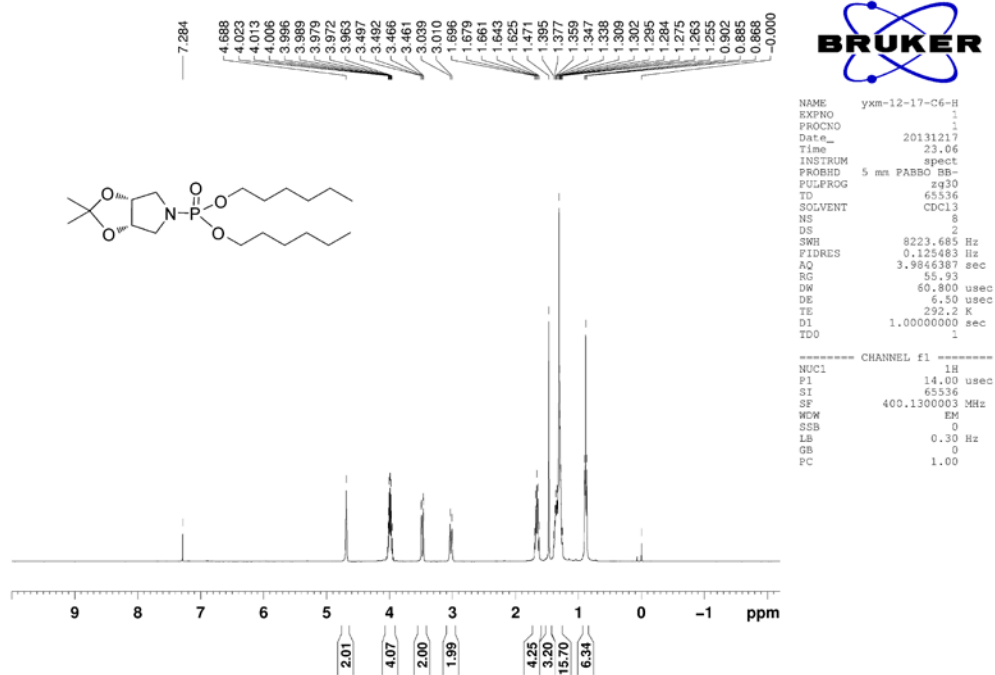

<sup>1</sup>H NMR Spectrum of Compound 16c

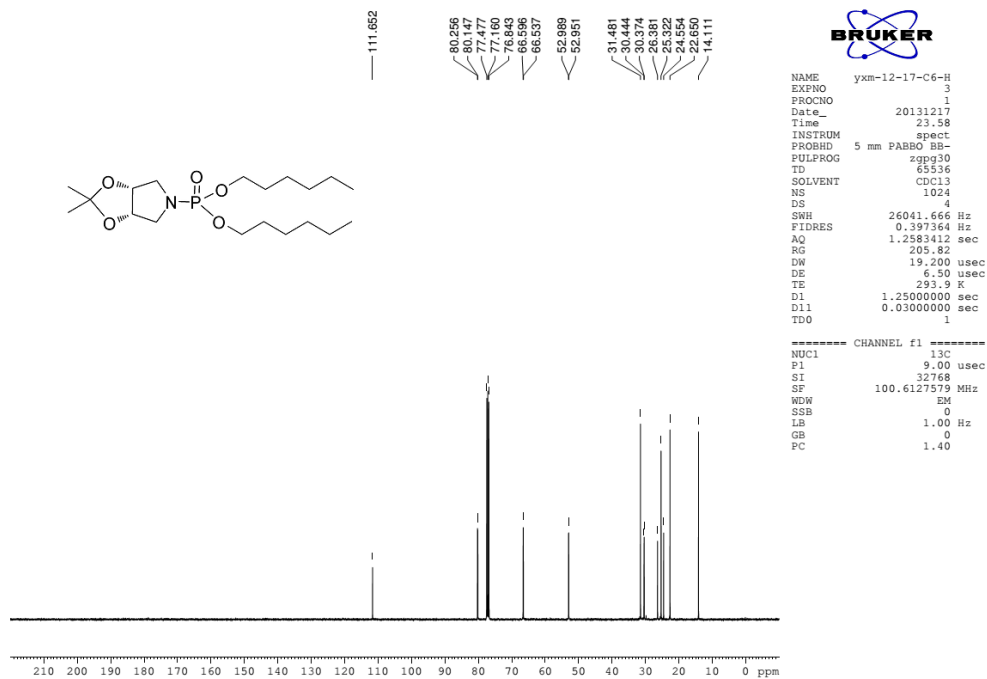

<sup>13</sup>C NMR Spectrum of Compound 16c

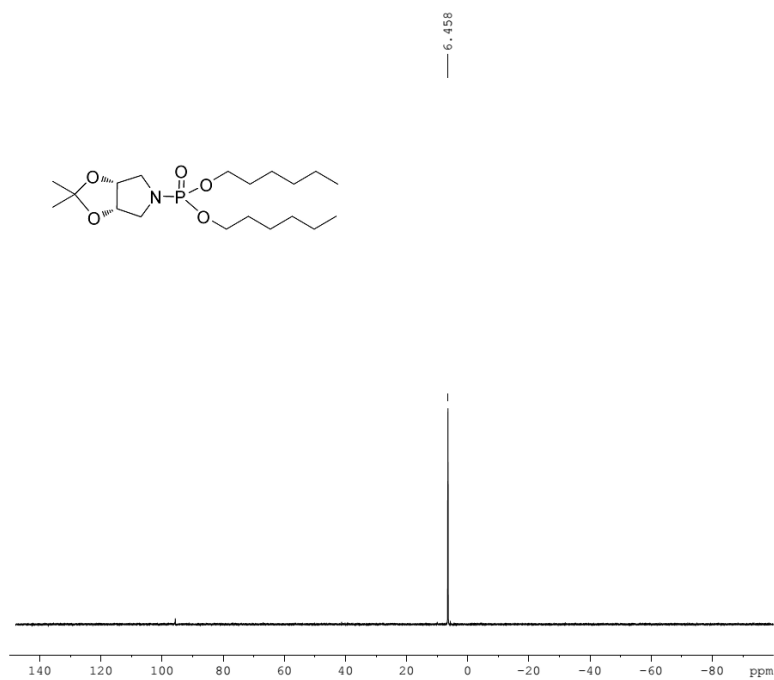

**BRUKER**

```

NAME      yxm-12-17-C6-H
EXPNO     2
PROCNO    1
Date_     20131217
Time      23.08
INSTRUM   spect
PROBHD    5 mm PABBO BB-
PULPROG   zg30
TD         65536
SOLVENT   CDCl3
NS         32
DS         4
SWH       64102.563 Hz
FIDRES    0.978127 Hz
AQ         0.5112308 sec
RG         205.82
DW         7.800 usec
DE         6.50 usec
TE         292.2 K
D1         2.0000000 sec
TDO        1

===== CHANNEL f1 =====
NUC1      31P
P1        14.00 usec
SI        32768
SF        161.9755930 MHz
WDW       EM
SSB       0
LB        1.00 Hz
GB        0
PC        1.40
  
```

<sup>31</sup>P NMR Spectrum of Compound 16c

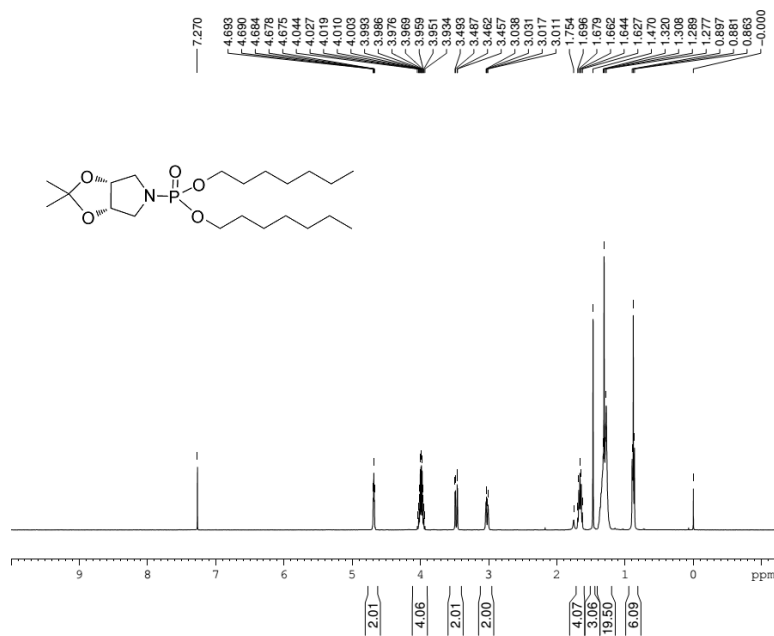

**BRUKER**

```

NAME      YXM-3-29-bc7
EXPNO     1
PROCNO    1
Date_     20140329
Time      23.15
INSTRUM   spect
PROBHD    5 mm PABBO BB-
PULPROG   zg30
TD         65536
SOLVENT   CDCl3
NS         16
DS         2
SWH       8223.685 Hz
FIDRES    0.125483 Hz
AQ         3.9846387 sec
RG         112.54
DW         60.900 usec
DE         6.50 usec
TE         296.6 K
D1         1.0000000 sec
TDO        1

===== CHANNEL f1 =====
NUC1      1H
P1        14.00 usec
SI        65536
SF        400.1300065 MHz
WDW       EM
SSB       0
LB        0.30 Hz
GB        0
PC        1.00
  
```

<sup>1</sup>H NMR Spectrum of Compound 16d

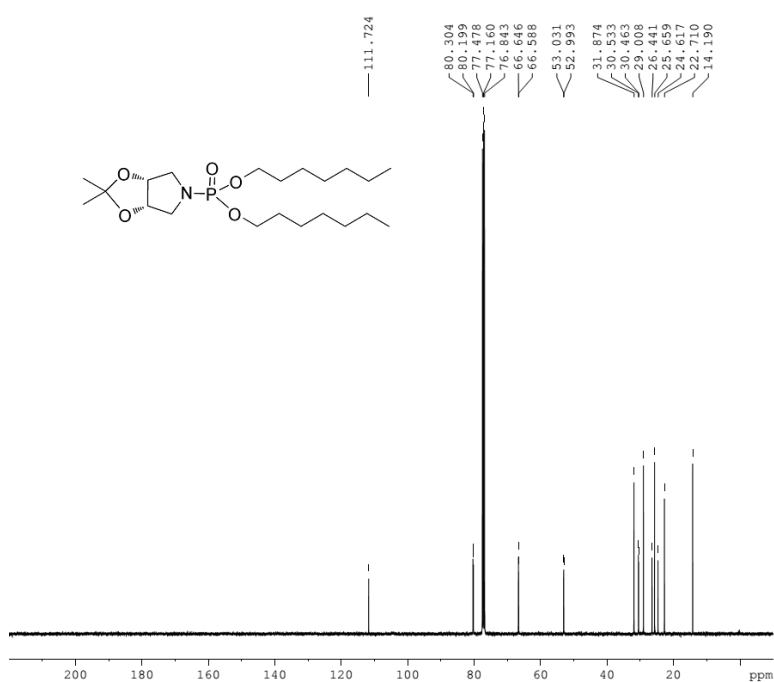

**BRUKER**

```

NAME      YXM-3-29-bc7
EXPNO    3
PROCNO   1
Date_    20140330
Time     0.28
INSTRUM  spect
PROBHD   5 mm PABBO BB-
PULPROG  zgpg30
TD       65536
SOLVENT  CDCl3
NS       1500
DS       4
SWH      26041.666 Hz
FIDRES   0.397364 Hz
AQ       1.2583412 sec
RG       205.82
DW       19.200 usec
DE       6.50 usec
TE       298.2 K
D1       1.25000000 sec
D11      0.03000000 sec
TD0      1

===== CHANNEL f1 =====
NUC1     13C
P1       9.00 usec
SI       32768
SF       100.6127548 MHz
WDW      EM
SSB      0
LB       1.00 Hz
GB       0
PC       1.40

```

<sup>13</sup>C NMR Spectrum of Compound 16d

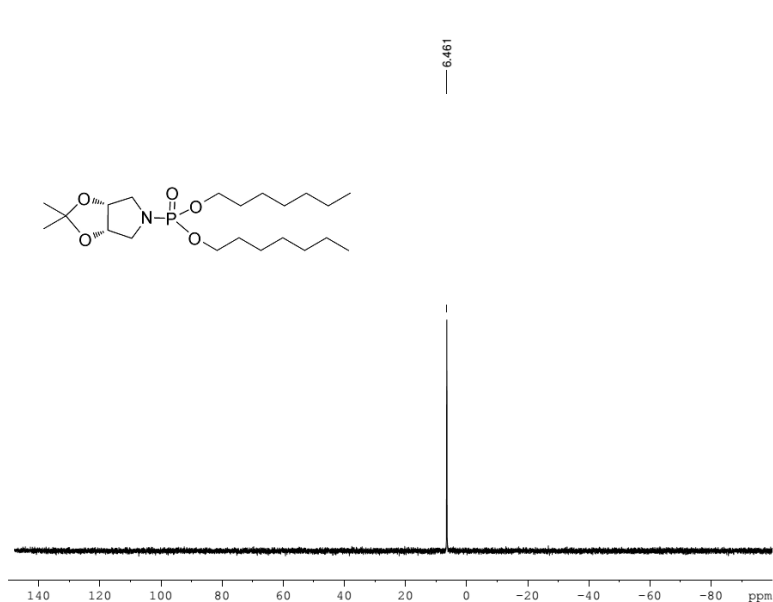

**BRUKER**

```

NAME      YXM-3-29-bc7
EXPNO    2
PROCNO   1
Date_    20140329
Time     23.17
INSTRUM  spect
PROBHD   5 mm PABBO BB-
PULPROG  zg30
TD       65536
SOLVENT  CDCl3
NS       32
DS       4
SWH      64102.563 Hz
FIDRES   0.978127 Hz
AQ       0.5112308 sec
RG       205.82
DW       7.800 usec
DE       6.50 usec
TE       296.6 K
D1       2.00000000 sec
TD0      1

===== CHANNEL f1 =====
NUC1     31P
P1       14.00 usec
SI       32768
SF       161.9755930 MHz
WDW      EM
SSB      0
LB       1.00 Hz
GB       0
PC       1.40

```

<sup>31</sup>P NMR Spectrum of Compound 16d

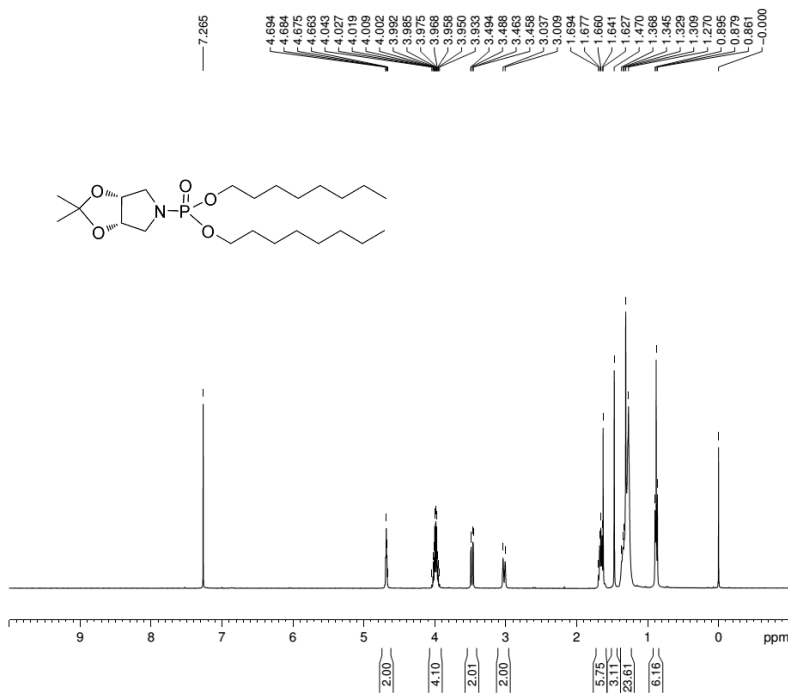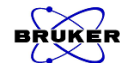

```

NAME          YXM-3-3-2
EXPNO         1
PROCNO        1
Date_         20140303
Time          22.47
INSTRUM       spect
PROBHD        5 mm PABBO BB-
PULPROG       zg30
TD            65536
SOLVENT       CDC13
NS            8
DS            2
SWH           8223.685 Hz
FIDRES        0.125483 Hz
AQ            3.9846387 sec
RG            183
DW            60.800 usec
DE            6.50 usec
TE            294.5 K
D1            1.00000000 sec
TDO           1
----- CHANNEL f1 -----
NUC1          1H
P1            14.00 usec
SI            65536
SF            400.1300084 MHz
WDW           EM
SSB           0
LB            0.30 Hz
GB            0
PC            1.00

```

<sup>1</sup>H NMR Spectrum of Compound 16e

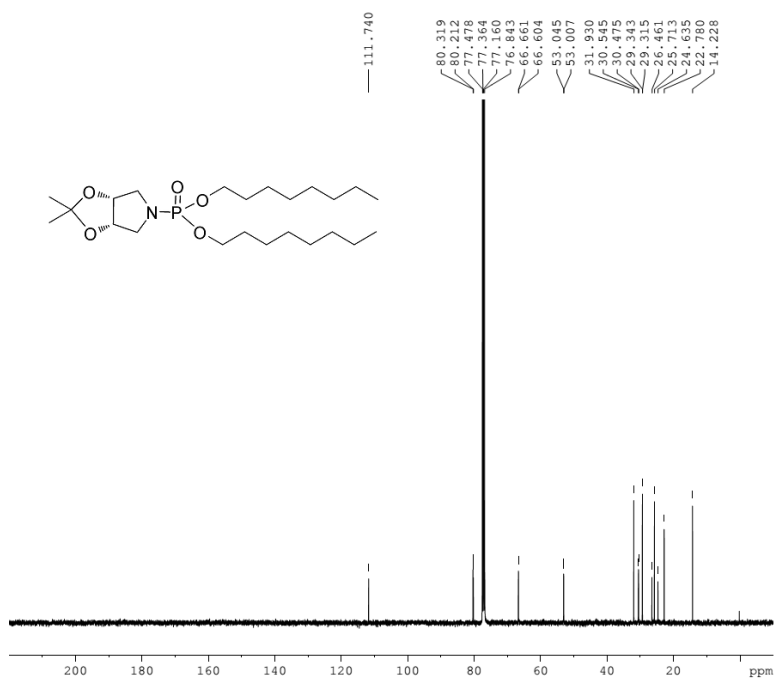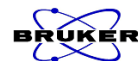

```

NAME          yxm-3-4
EXPNO         2
PROCNO        1
Date_         20140304
Time          17.42
INSTRUM       spect
PROBHD        5 mm PABBO BB-
PULPROG       zgpg30
TD            65536
SOLVENT       CDC13
NS            4
DS            4
SWH           26041.666 Hz
FIDRES        0.397364 Hz
AQ            1.2583412 sec
RG            205.82
DW            19.200 usec
DE            6.50 usec
TE            298.7 K
D1            1.25000000 sec
D11           0.03000000 sec
TDO           1
----- CHANNEL f1 -----
NUC1          13C
P1            9.00 usec
SI            32768
SF            100.6127541 MHz
WDW           EM
SSB           0
LB            1.00 Hz
GB            0
PC            1.40

```

<sup>13</sup>C NMR Spectrum of Compound 16e

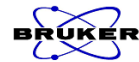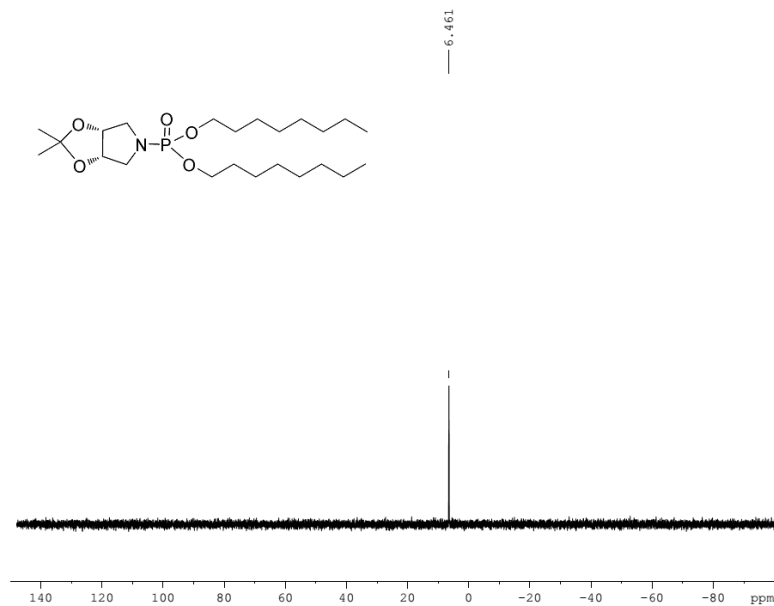

NAME yxm-3-4  
EXPNO 3  
PROCNO 1  
Date\_ 20140304  
Time 17.44  
INSTRUM spect  
PROBHD 5 mm PABBO BB-  
PULPROG zg30  
TD 65536  
SOLVENT CDCl3  
NS 32  
DS 4  
SWH 64102.563 Hz  
FIDRES 0.978127 Hz  
AQ 0.5112308 sec  
RG 205.82  
DW 7.800 usec  
DE 6.50 usec  
TE 297.5 K  
D1 2.00000000 sec  
TDO 1

----- CHANNEL f1 -----  
NUC1 31P  
P1 14.00 usec  
SI 32768  
SF 161.9755930 MHz  
WDW EM  
SSB 0  
LB 1.00 Hz  
GB 0  
PC 1.40

<sup>31</sup>P NMR Spectrum of Compound 16e

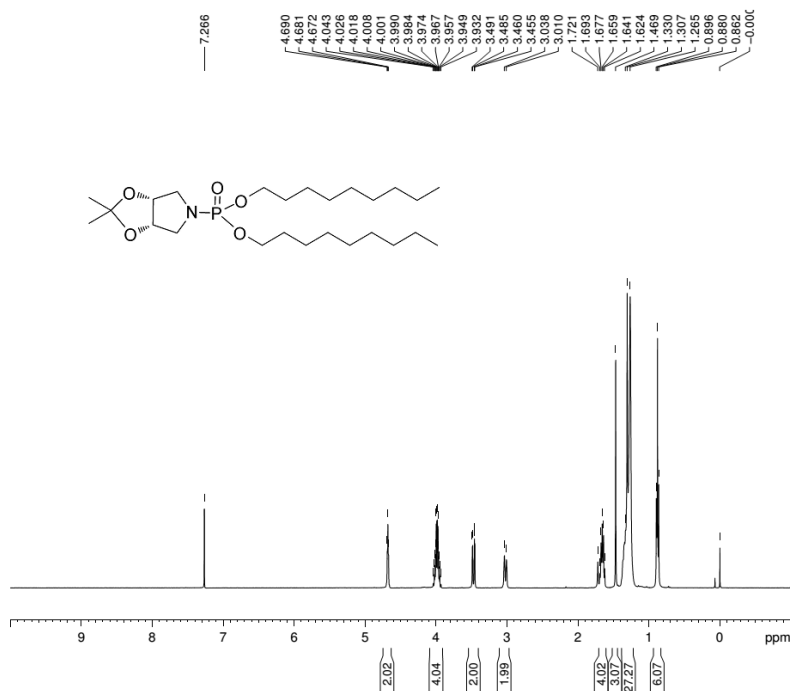

NAME YXM-4-9-1  
EXPNO 1  
PROCNO 1  
Date\_ 20140409  
Time 18.10  
INSTRUM spect  
PROBHD 5 mm PABBO BB-  
PULPROG zg30  
TD 65536  
SOLVENT CDCl3  
NS 8  
DS 2  
SWH 8223.685 Hz  
FIDRES 0.125483 Hz  
AQ 3.9846387 sec  
RG 112.54  
DW 60.800 usec  
DE 6.50 usec  
TE 299.2 K  
D1 1.00000000 sec  
TDO 1

----- CHANNEL f1 -----  
NUC1 1H  
P1 14.00 usec  
SI 65536  
SF 400.1300079 MHz  
WDW EM  
SSB 0  
LB 0.30 Hz  
GB 0  
PC 1.00

<sup>1</sup>H NMR Spectrum of Compound 16f

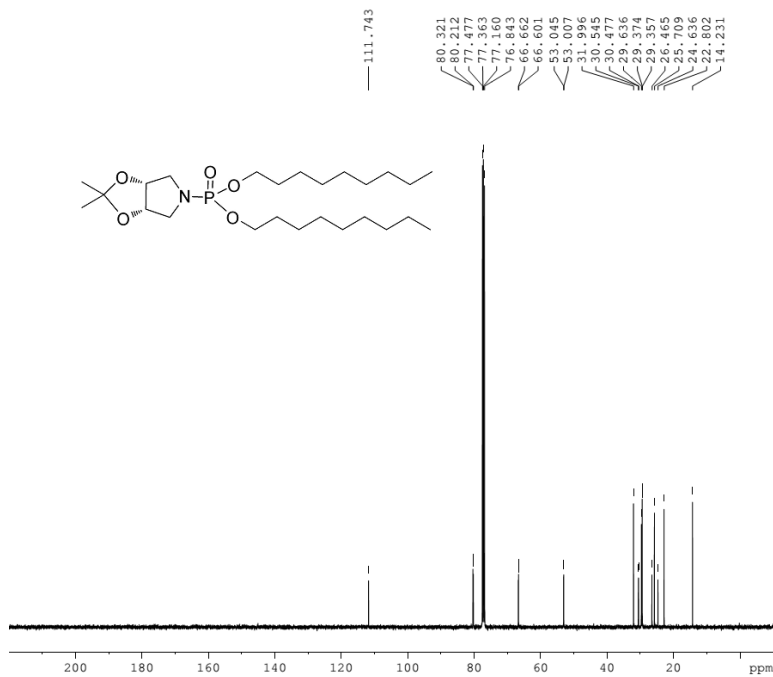

BRUKER

```

NAME      YXM-4-9-1
EXPNO    2
PROCNO   1
Date_    20140409
Time     18.55
INSTRUM  spect
PROBHD   5 mm PABBO BB-
PULPROG  zgpg30
TD        65536
SOLVENT  CDCl3
NS        1024
DS        4
SWH      26041.666 Hz
FIDRES   0.397364 Hz
AQ        1.2583412 sec
RG        205.82
DW        19.200 usec
DE        6.50 usec
TE        300.1 K
D1        1.25000000 sec
D11       0.03000000 sec
TDO       1

===== CHANNEL f1 =====
NUC1      13C
P1        9.00 usec
SI        32768
SF        100.6127538 MHz
WDW       EM
SSB       0
LB        1.00 Hz
GB        0
PC        1.40
  
```

<sup>13</sup>C NMR Spectrum of Compound 16f

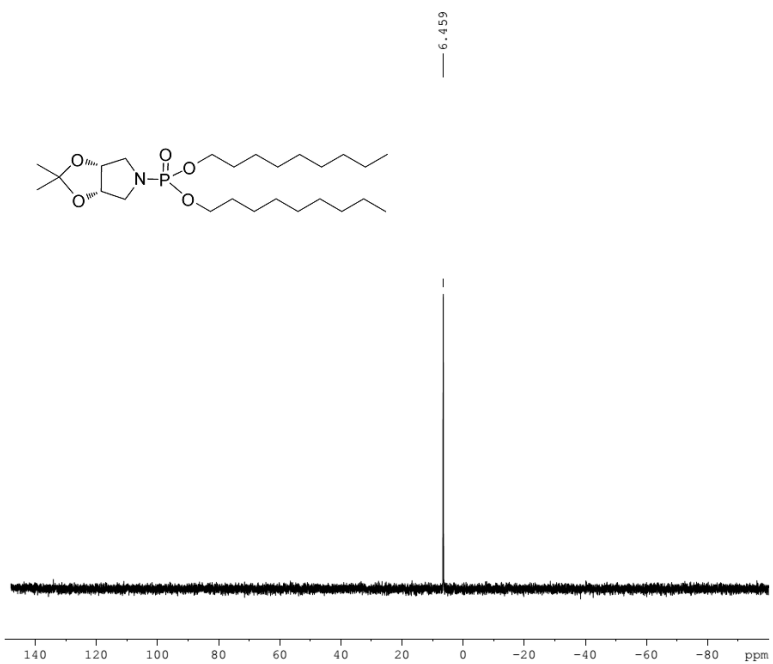

BRUKER

```

NAME      YXM-4-7-1
EXPNO    2
PROCNO   1
Date_    20140408
Time     21.14
INSTRUM  spect
PROBHD   5 mm PABBO BB-
PULPROG  zg30
TD        65536
SOLVENT  CDCl3
NS        32
DS        4
SWH      64102.563 Hz
FIDRES   0.378127 Hz
AQ        0.5112308 sec
RG        205.82
DW        7.800 usec
DE        6.50 usec
TE        297.1 K
D1        2.00000000 sec
TDO       1

===== CHANNEL f1 =====
NUC1      31P
P1        14.00 usec
SI        32768
SF        161.9755930 MHz
WDW       EM
SSB       0
LB        1.00 Hz
GB        0
PC        1.40
  
```

<sup>31</sup>P NMR Spectrum of Compound 16f



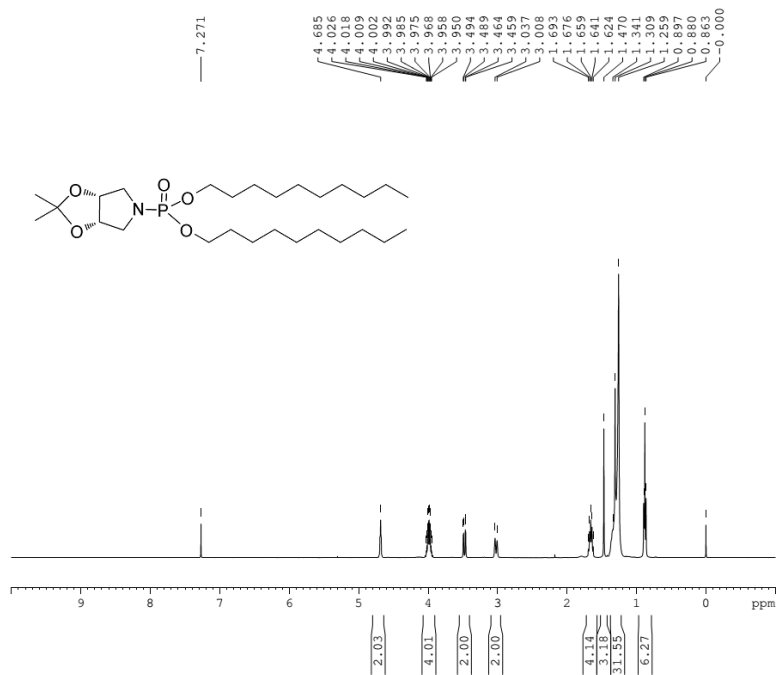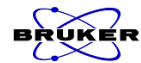

```

NAME      YXM-12-4-C10
EXPNO     1
PROCNO    1
Date_     20131203
Time      22.00
INSTRUM   spect
PROBHD    5 mm PABBO BB-
PULPROG   zg30
TD         65536
SOLVENT   CDCl3
NS         8
DS         2
SWH        8223.685 Hz
FIDRES     0.125483 Hz
AQ         3.9846387 se
RG         80.41
DW         60.800 us
DE         6.50 us
TE         292.9 K
D1         1.00000000 se
TDO        1

===== CHANNEL f1 =====
NUC1      1H
P1        14.00 us
SI        65536
SF        400.1300055 MH
WDW       EM
SSB       0
LB        0.30 Hz
GB        0
PC        1.00
  
```

<sup>1</sup>H NMR Spectrum of Compound 16g

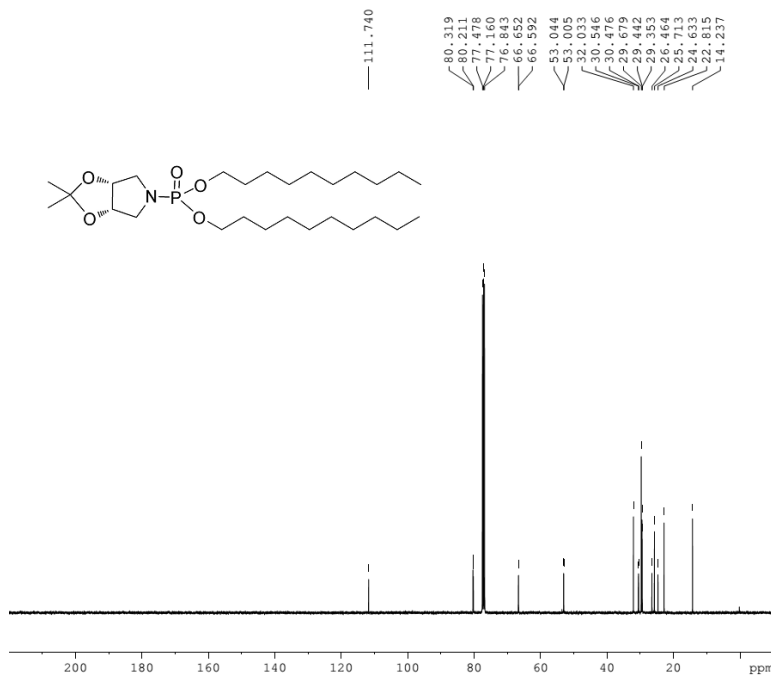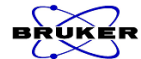

```

NAME      YXM-11-30-10
EXPNO     3
PROCNO    1
Date_     20131201
Time      0.46
INSTRUM   spect
PROBHD    5 mm PABBO BB-
PULPROG   zgpg30
TD         65536
SOLVENT   CDCl3
NS         1024
DS         4
SWH        26041.666 Hz
FIDRES     0.397364 Hz
AQ         1.2583412 sec
RG         205.82
DW         19.200 usec
DE         6.50 usec
TE         300.3 K
D1         1.25000000 sec
D11        0.03000000 sec
TDO        1

===== CHANNEL f1 =====
NUC1      13C
P1        9.00 usec
SI        32768
SF        100.6127540 MHz
WDW       EM
SSB       0
LB        1.00 Hz
GB        0
PC        1.40
  
```

<sup>13</sup>C NMR Spectrum of Compound 16g

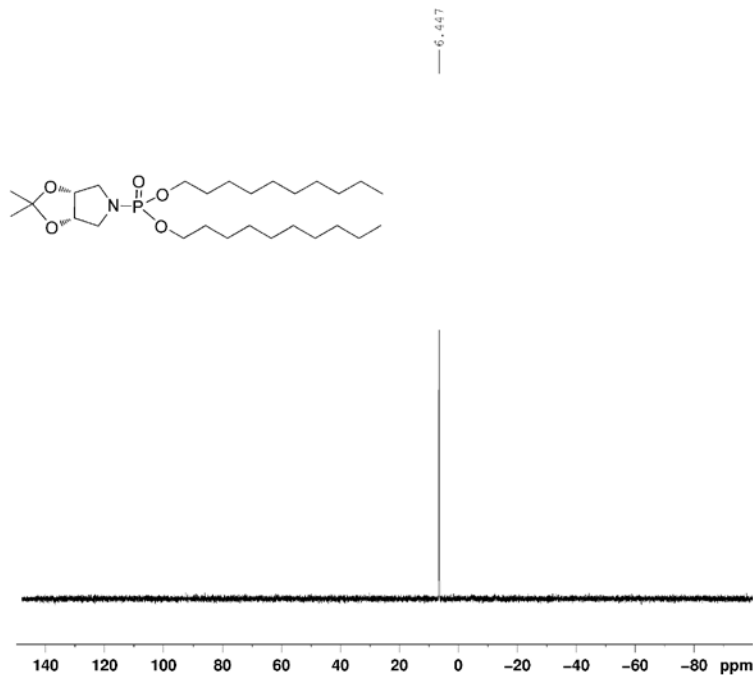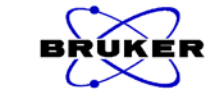

```

NAME      YXM-12-3-C10
EXPNO     2
PROCNO    1
Date_     20131204
Time      0.01
INSTRUM   spect
PROBHD    5 mm PABBO B3-
PULPROG   zg30
TD         65536
SOLVENT   CDCl3
NS         32
DS         4
SWH        64102.563 Hz
FIDRES     0.978127 Hz
AQ         0.5112308 sec
RG         205.82
DW         7.800 usec
DE         6.50 usec
TE         298.3 K
D1         2.0000000 sec
TDO        1

```

```

----- CHANNEL f1 -----
NUC1      31P
P1         14.00 usec
SI         32768
SF        161.9755930 MHz
WDW        EM
SSB        0
LB         1.00 Hz
GB         0
PC         1.40

```

$^{31}\text{P}$  NMR Spectrum of Compound 16g

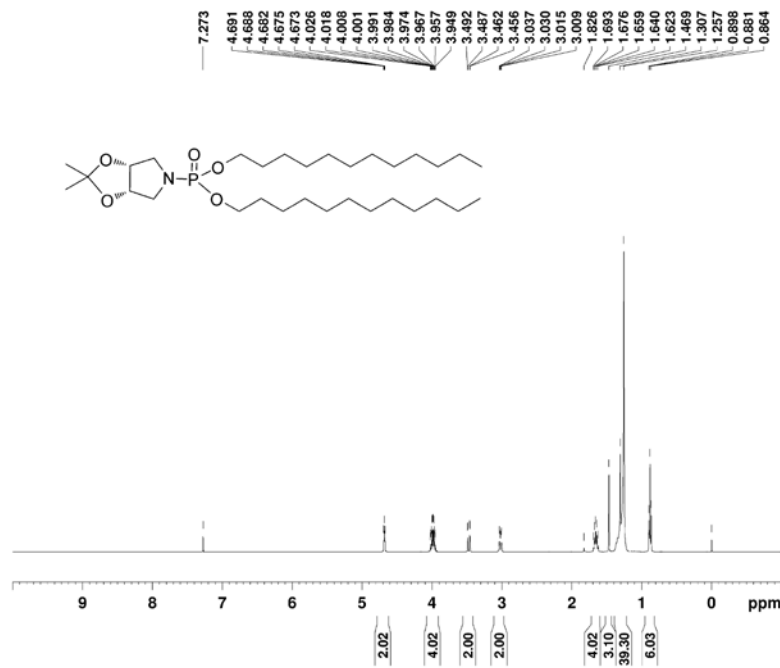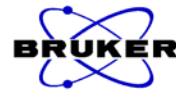

```

NAME      YXM-3-15-b12
EXPNO     2
PROCNO    1
Date_     20140315
Time      20.45
INSTRUM   spect
PROBHD    5 mm PABBO B3-
PULPROG   zg30
TD         65536
SOLVENT   CDCl3
NS         8
DS         2
SWH        8223.685 Hz
FIDRES     0.125483 Hz
AQ         3.9846387 sec
RG         60.4
DW         60.800 usec
DE         6.50 usec
TE         296.8 K
D1         1.0000000 sec
TDO        1

```

```

----- CHANNEL f1 -----
NUC1      1H
P1         14.00 usec
SI         65536
SF        400.1300050 MHz
WDW        EM
SSB        0
LB         0.30 Hz
GB         0
PC         1.00

```

$^1\text{H}$  NMR Spectrum of Compound 16h

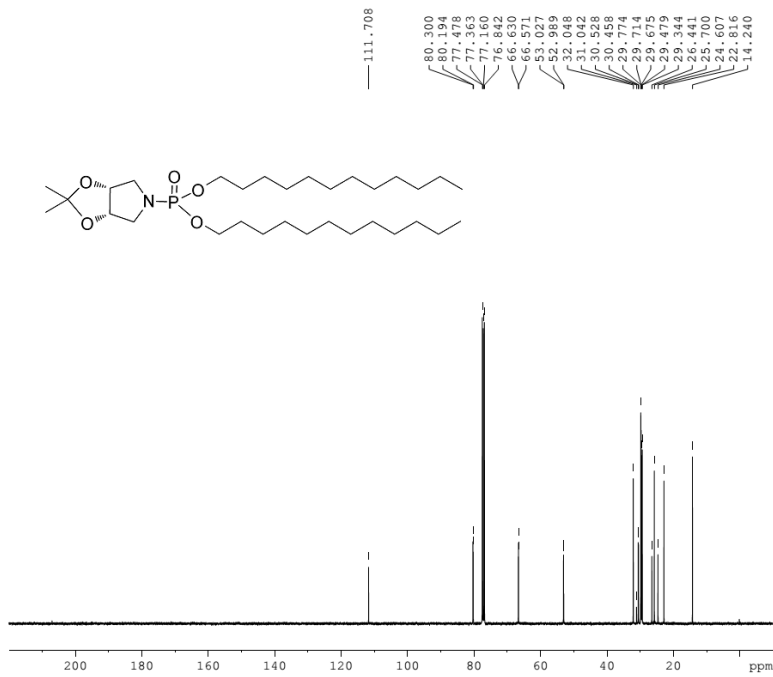

```

NAME      YXM-3-15-b12
EXPNO    4
PROCNO   1
Date_    20140315
Time     22.03
INSTRUM  spect
PROBHD   5 mm PABBO BB-
PULPROG  zgpg30
TD        65536
SOLVENT  CDCl3
NS        1500
DS        4
SWH       26041.666 Hz
FIDRES    0.397364 Hz
AQ        1.2583412 sec
RG         205.82
DW         19.200 usec
DE         6.50 usec
TE         298.6 K
D1         1.25000000 sec
D11        0.03000000 sec
TDO
  
```

```

===== CHANNEL f1 =====
NUC1      13C
P1         9.00 usec
SI         32768
SF        100.6127552 MHz
WDW        EM
SSB         0
LB         1.00 Hz
GB         0
PC         1.40
  
```

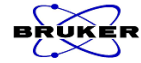

<sup>13</sup>C NMR Spectrum of Compound 16h

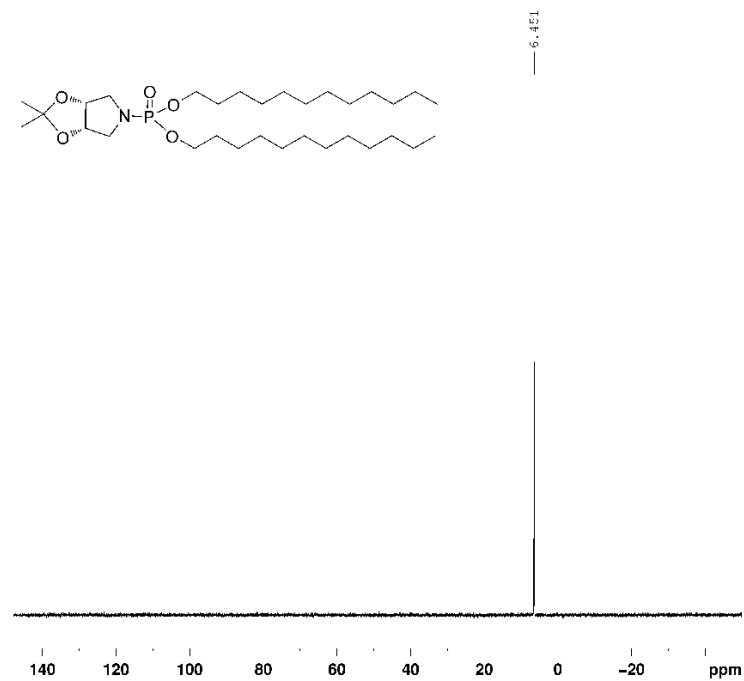

```

NAME      YXM-3-15-b12
EXPNO    3
PROCNO   1
Date_    20140213
Time     20.47
INSTRUM  spect
PROBHD   5 mm PABBO BB-
PULPROG  zgpg30
TD        65536
SOLVENT  CDCl3
NS        32
DS        4
SWH       6102.563 Hz
FIDRES    0.398122 Hz
AQ        0.5112308 sec
RG         205.82
DW         7.600 usec
DE         6.50 usec
TE         298.6 K
D1         0.03000000 sec
TDO
  
```

```

===== CHANNEL f1 =====
NUC1      31P
P1         16.00 usec
SI         32768
SF        161.9753226 MHz
WDW        EM
SSB         0
LB         1.00 Hz
GB         0
PC         1.40
  
```

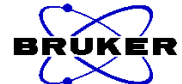

<sup>31</sup>P NMR Spectrum of Compound 16h

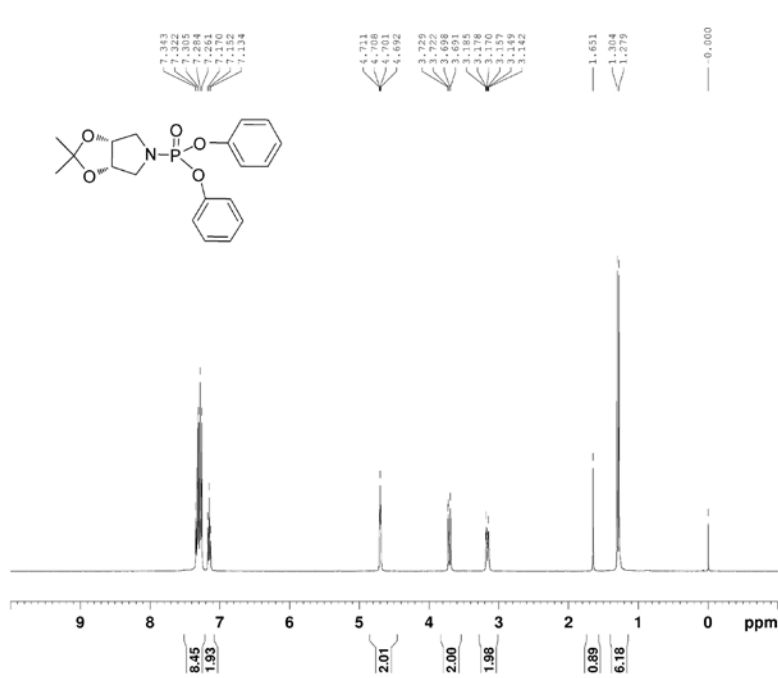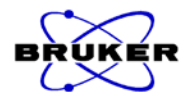

```

NAME          yxm11-2-7
EXPNO         1
PROCNO        1
Date_         20131102
Time          20.54
INSTRUM       spect
PROBHD        5 mm PABBO BB-
PULPROG       zg30
TD            65536
SOLVENT       CDCl3
NS            8
DS            2
SWH           8223.685 Hz
FIDRES        0.125483 Hz
AQ            3.9846387 sec
RG            183
DW            60.800 usec
DE            6.50 usec
TE            297.4 K
D1            1.0000000 sec
TDO           1

===== CHANNEL f1 =====
NUC1          1H
P1            14.00 usec
SI            65536
SF            400.1300101 MHz
WDW           EM
SSB           0
LB            0.30 Hz
GB            0
PC            1.00
  
```

<sup>1</sup>H NMR Spectrum of Compound 16i

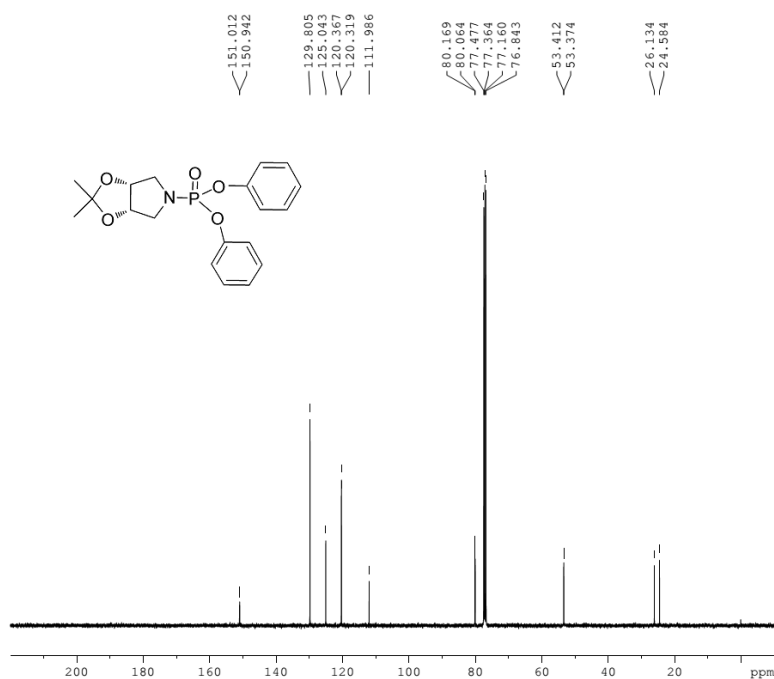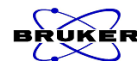

```

NAME          YXM10-29-7
EXPNO         2
PROCNO        1
Date_         20131031
Time          19.39
INSTRUM       spect
PROBHD        5 mm PABBO BB-
PULPROG       zgpg30
TD            65536
SOLVENT       CDCl3
NS            1024
DS            4
SWH           26041.666 Hz
FIDRES        0.397364 Hz
AQ            1.2583412 sec
RG            205.82
DW            19.200 usec
DE            6.50 usec
TE            298.5 K
D1            1.2500000 sec
D11           0.0300000 sec
TDO           1

===== CHANNEL f1 =====
NUC1          13C
P1            9.00 usec
SI            32768
SF            100.6127556 MHz
WDW           EM
SSB           0
LB            1.00 Hz
GB            0
PC            1.40
  
```

<sup>13</sup>C NMR Spectrum of Compound 16i

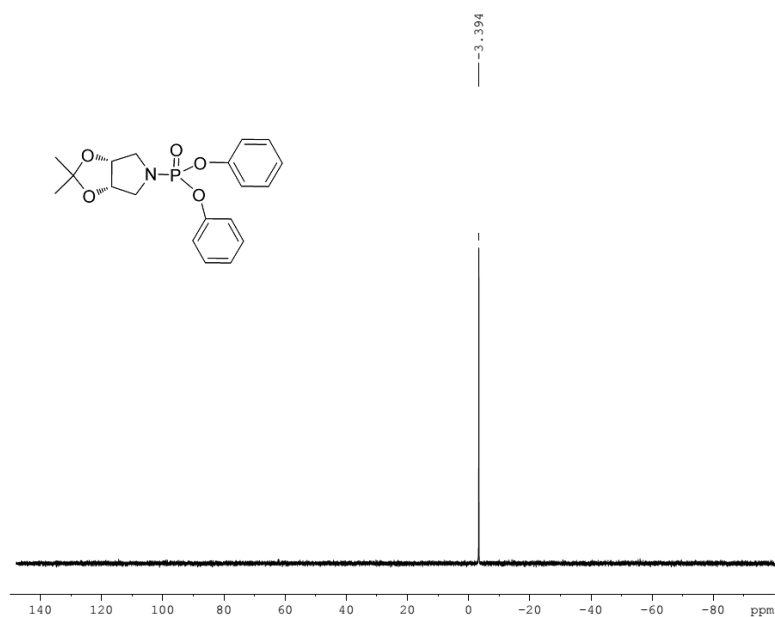

**BRUKER**

```

NAME      yxm11-2-7
EXPNO     2
PROCNO    1
Date_     20131102
Time      20.57
INSTRUM   spect
PROBHD    5 mm PABBO BB-
PULPROG   zg30
TD         65536
SOLVENT   CDCl3
NS         32
DS         4
SWH       64102.563 Hz
FIDRES    0.978127 Hz
AQ        0.5112308 sec
RG         205.82
DW         7.800 usec
DE         6.50 usec
TE         297.4 K
D1         2.0000000 sec
D10        1
===== CHANNEL f1 =====
NUC1      31P
P1        14.00 usec
SI        32768
SF        161.9755930 MHz
WDW       EM
SSB       0
LB        1.00 Hz
GB         0
PC         1.40
  
```

$^{31}\text{P}$  NMR Spectrum of Compound 16i

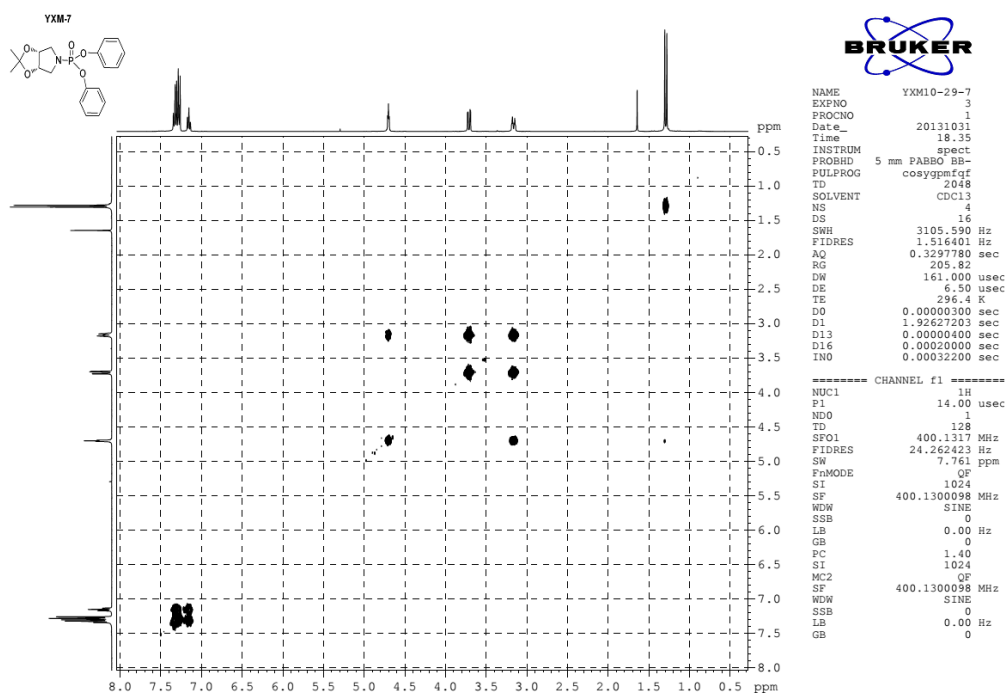

**BRUKER**

```

NAME      YXM10-29-7
EXPNO     3
PROCNO    1
Date_     20131031
Time      18.35
INSTRUM   spect
PROBHD    5 mm PABBO BB-
PULPROG   cosygpmfqr
TD         2048
SOLVENT   CDCl3
NS         4
DS         16
SWH       3105.590 Hz
FIDRES    1.516401 Hz
AQ        0.3297780 sec
RG         205.82
DW         161.000 usec
DE         6.50 usec
TE         296.4 K
D0         0.0000000 sec
D1         1.92627203 sec
D13        0.00000400 sec
D16        0.00020000 sec
D10        0.00032000 sec
===== CHANNEL f1 =====
NUC1      1H
P1        14.00 usec
ID        1
SFO1     400.1317 MHz
FIDRES    24.262423 Hz
SW        7.761 ppm
F1MODE    QF
SI        1024
SF        400.1300098 MHz
WDW       SINE
SSB       0
LB        0.00 Hz
GB         0
PC         1.40
SI        1024
MC2       QF
SF        400.1300098 MHz
WDW       SINE
SSB       0
LB        0.00 Hz
GB         0
  
```

H-H COSY Spectrum of Compound 16i

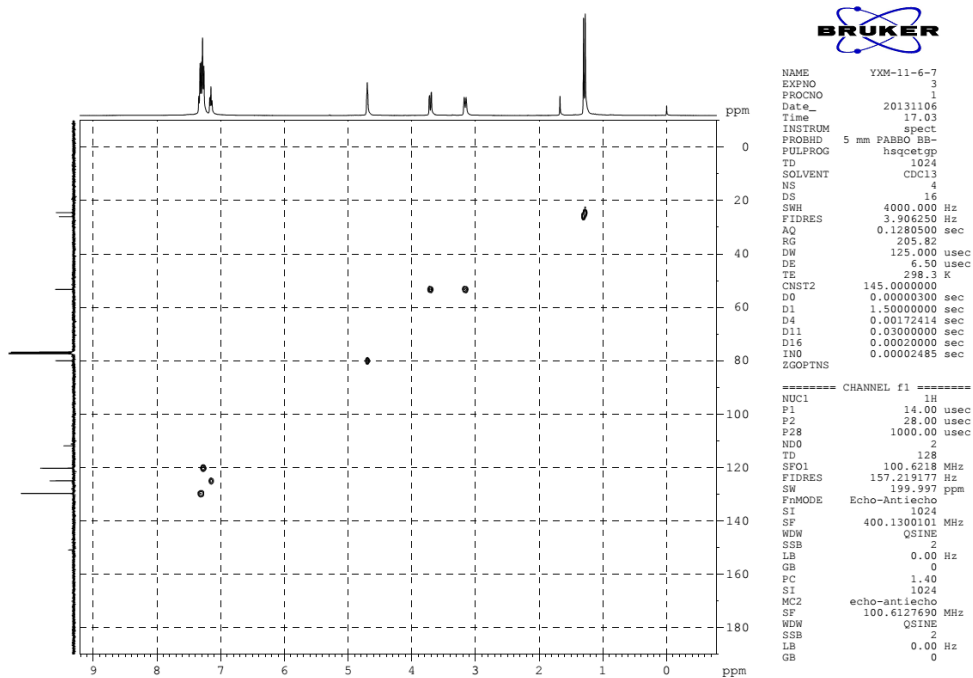

HSQC Spectrum of Compound 16i

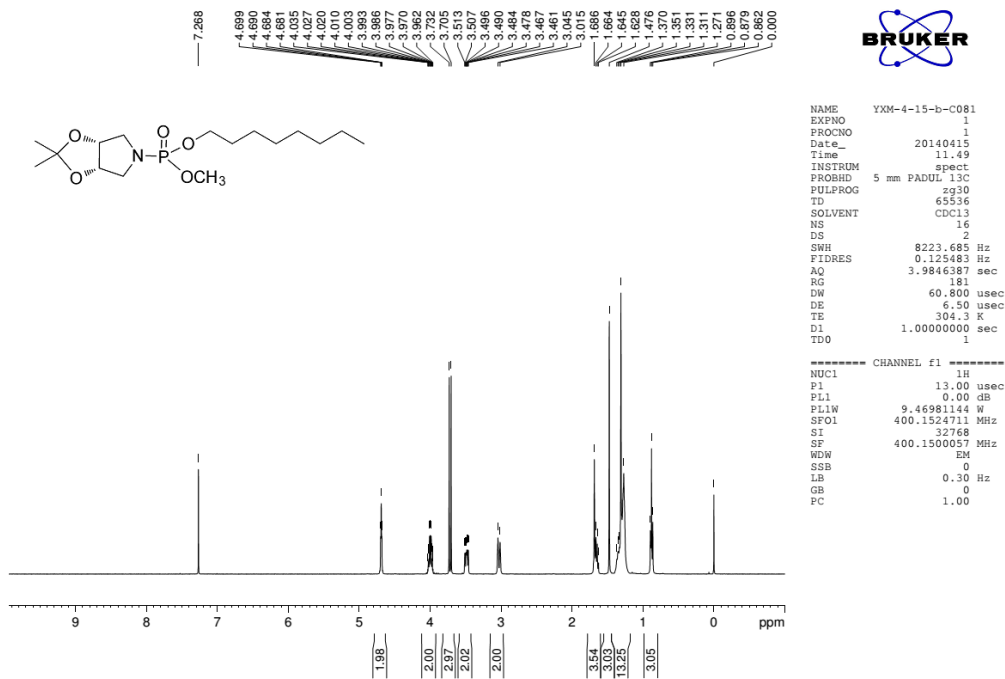

<sup>1</sup>H NMR Spectrum of Compound 16j

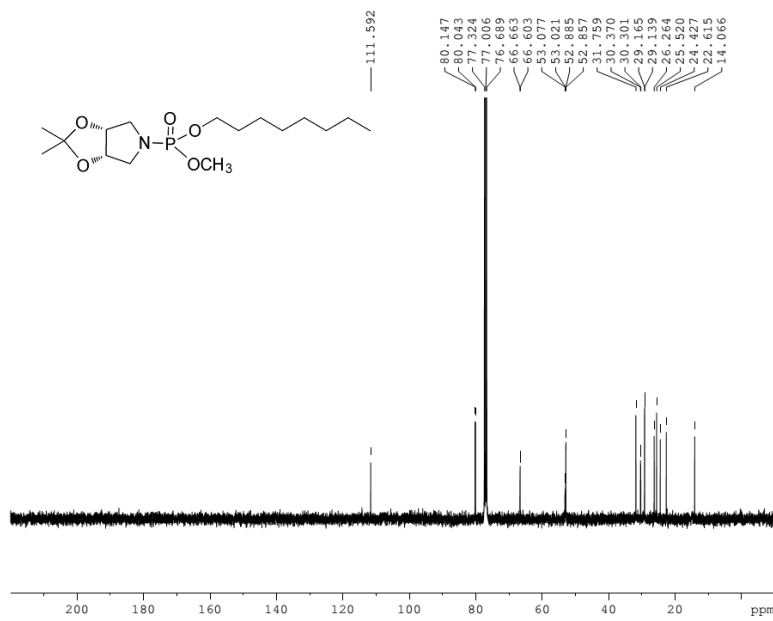

NAME YXM-4-15-b-081  
 EXPNO 2  
 PROCNO 1  
 Date\_ 20140415  
 Time 12.03  
 INSTRUM spect  
 PROBHD 5 mm PADUL 13C  
 PULPROG zgpg30  
 TD 65536  
 SOLVENT CDCl3  
 NS 1024  
 DS 4  
 SWH 28409.092 Hz  
 FIDRES 0.433488 Hz  
 AQ 1.1534836 sec  
 RG 2050  
 DW 17.600 usec  
 DE 6.50 usec  
 TE 304.2 K  
 D1 1.2500000 sec  
 D11 0.0300000 sec  
 TDO 1

----- CHANNEL f1 -----  
 NUC1 13C  
 P1 9.50 usec  
 PL1 0.00 dB  
 PL1W 35.66878891 W  
 SFO1 100.6288660 MHz

----- CHANNEL f2 -----  
 CPDPRG2 waltz16  
 NDC2 16  
 PCPD2 60.00 usec  
 PL2 0.00 dB  
 PL12 13.28 dB  
 PL13 13.05 dB  
 PL2W 9.46981144 W  
 PL12W 0.44498092 W  
 PL13W 0.46918198 W  
 SFO2 400.1516006 MHz  
 S1 32768  
 SF 100.6177980 MHz  
 WDW EM  
 SSB 0  
 LB 1.00 Hz  
 GB 0  
 PC 1.40

<sup>13</sup>C NMR Spectrum of Compound 16j

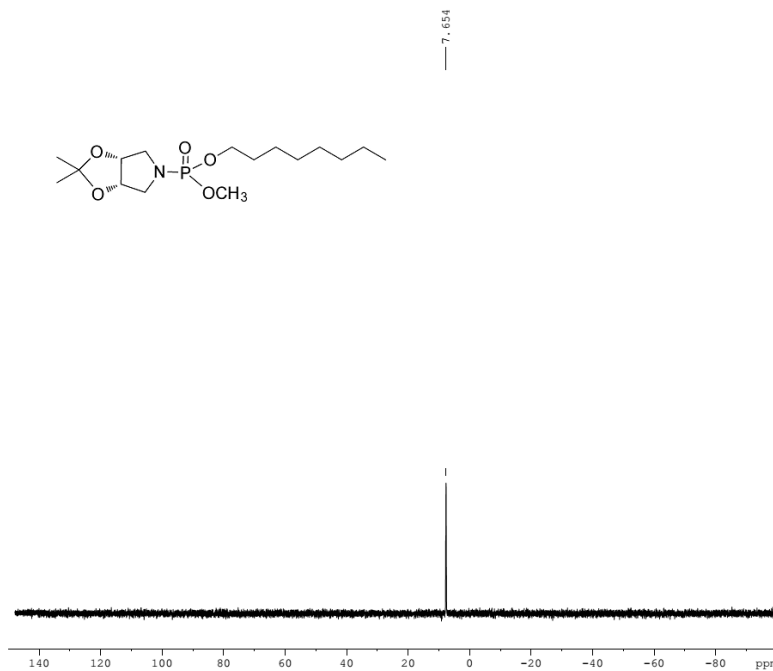

NAME YXM-4-16-b081p  
 EXPNO 3  
 PROCNO 1  
 Date\_ 20140416  
 Time 14.30  
 INSTRUM spect  
 PROBHD 5 mm PABBO BB-  
 PULPROG zg30  
 TD 65536  
 SOLVENT CDCl3  
 NS 32  
 DS 4  
 SWH 64102.563 Hz  
 FIDRES 0.978127 Hz  
 AQ 0.5112308 sec  
 RG 205.82  
 DW 7.800 usec  
 DE 6.50 usec  
 TE 297.7 K  
 D1 2.0000000 sec  
 TDO 1

----- CHANNEL f1 -----  
 NUC1 31P  
 P1 14.00 usec  
 S1 32768  
 SF 161.9755930 MHz  
 WDW EM  
 SSB 0  
 LB 1.00 Hz  
 GB 0  
 PC 1.40

<sup>31</sup>P NMR Spectrum of Compound 16j

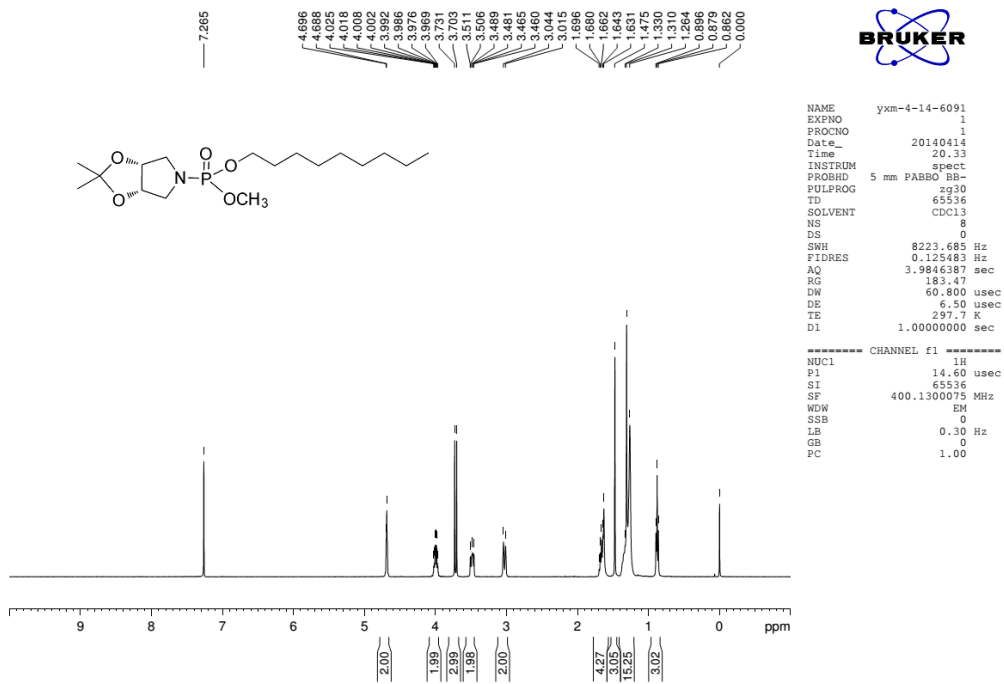

<sup>1</sup>H NMR Spectrum of Compound **16k**

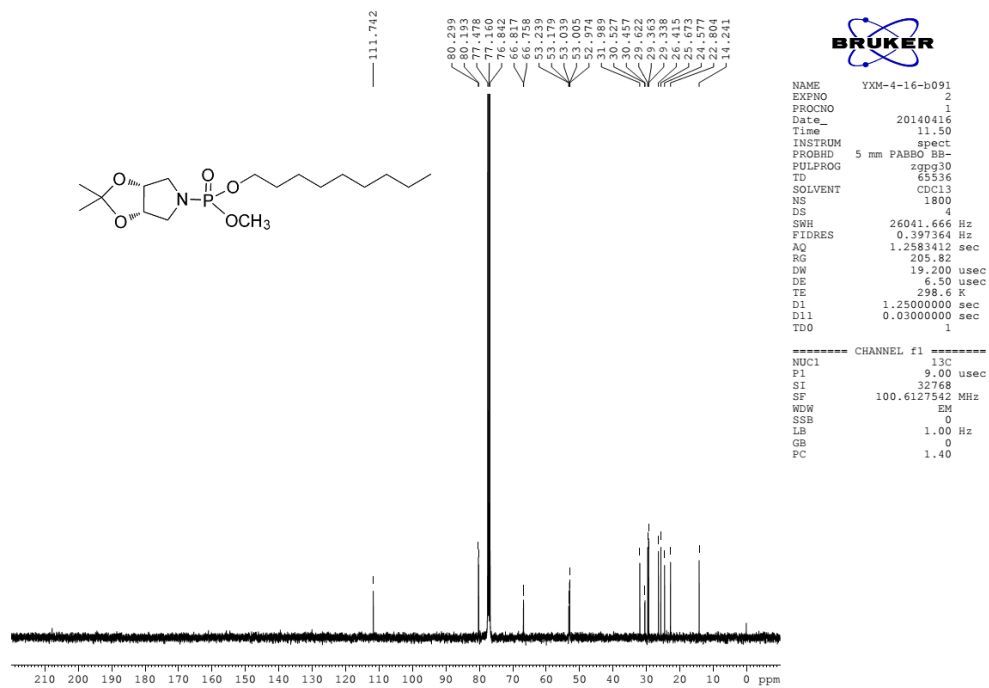

<sup>13</sup>C NMR Spectrum of Compound **16k**



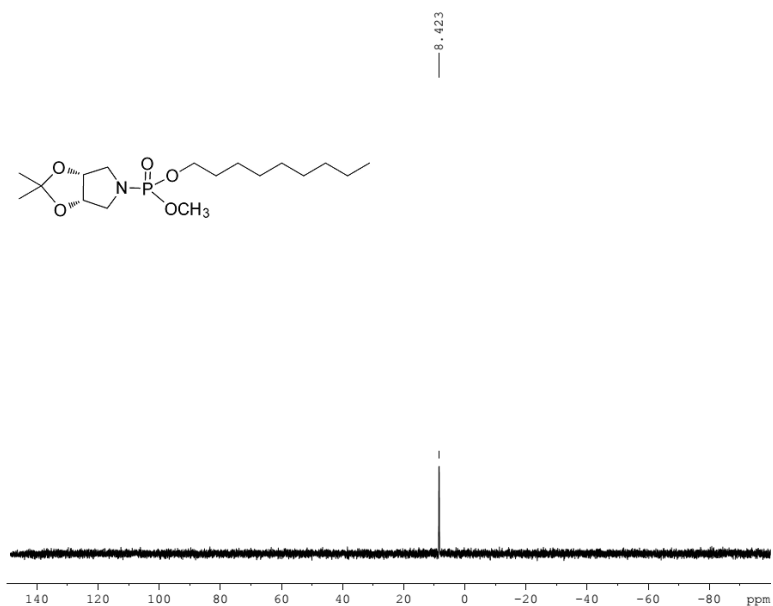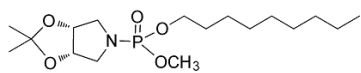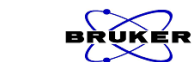

```

NAME      YXM-4-14-6092
EXPNO     1
PROCNO    1
Date_     20140414
Time      23.58
INSTRUM   spect
PROBHD    5 mm PABBO BB-
PULPROG   zg30
TD         65536
SOLVENT   CDCl3
NS         32
DS         4
SWH       64102.563 Hz
FIDRES    0.978127 Hz
AQ         0.5112308 sec
RG         205.82
DW         7.800 us
DE         6.50 us
TE         297.5 K
D1         2.0000000 sec
TDO        1
  
```

```

----- CHANNEL f1 -----
NUC1      31P
P1        14.00 us
SI        32768
SF        161.9754688 MHz
WDW       EM
SSB       0
LB        1.00 Hz
GB        0
PC        1.40
  
```

<sup>31</sup>P NMR Spectrum of Compound **16k**

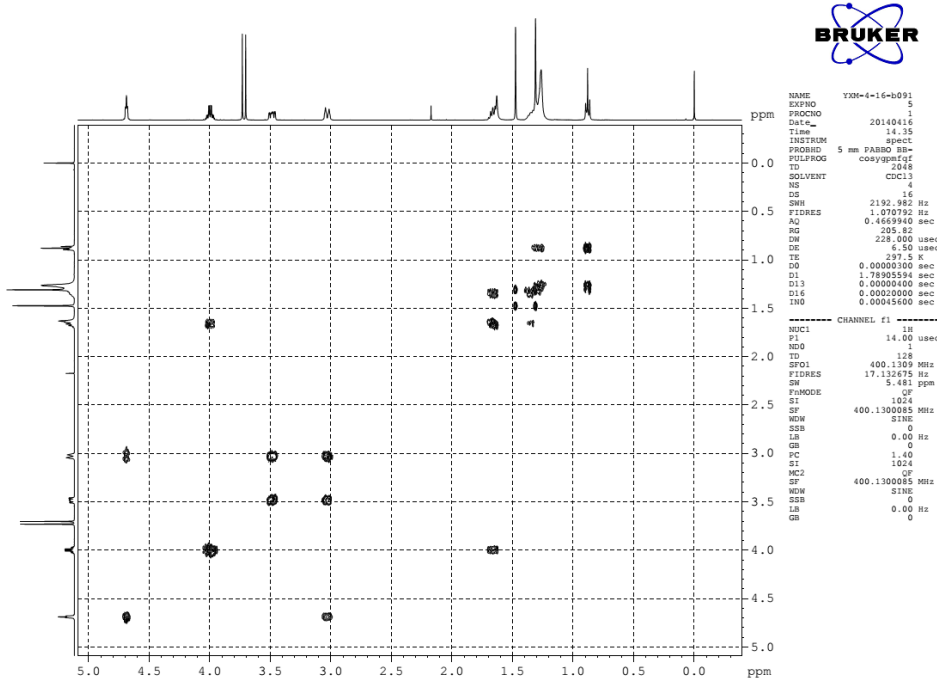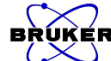

```

NAME      YXM-4-16-b091
EXPNO     5
PROCNO    1
Date_     20140416
Time      14.35
INSTRUM   spect
PROBHD    5 mm PABBO BB-
PULPROG   cosygpsfgz
TD         2048
SOLVENT   CDCl3
NS         4
DS         16
SWH       2192.982 Hz
FIDRES    1.070792 Hz
AQ         0.4669940 sec
RG         205.82
DW         228.000 usec
DE         4.50 usec
TE         297.5 K
D0         0.0000300 sec
D1         1.78905594 sec
D11        0.00000400 sec
D16        0.00020000 sec
IN0        0.00045600 sec
  
```

```

----- CHANNEL f1 -----
NUC1      1H
P1        14.00 usec
ND0       1
SF01      400.1309 MHz
FIDRES    17.132675 Hz
SW        5.484 ppm
FPMODE    OF
SI         1024
WDW       400.1300085 MHz
SSB       0
LB        0.00 Hz
GB        0
PC        1.40
SF        400.1300085 MHz
WDW       SINE
SSB       0
LB        0.00 Hz
GB        0
  
```

H-H COSY Spectrum of Compound **16k**

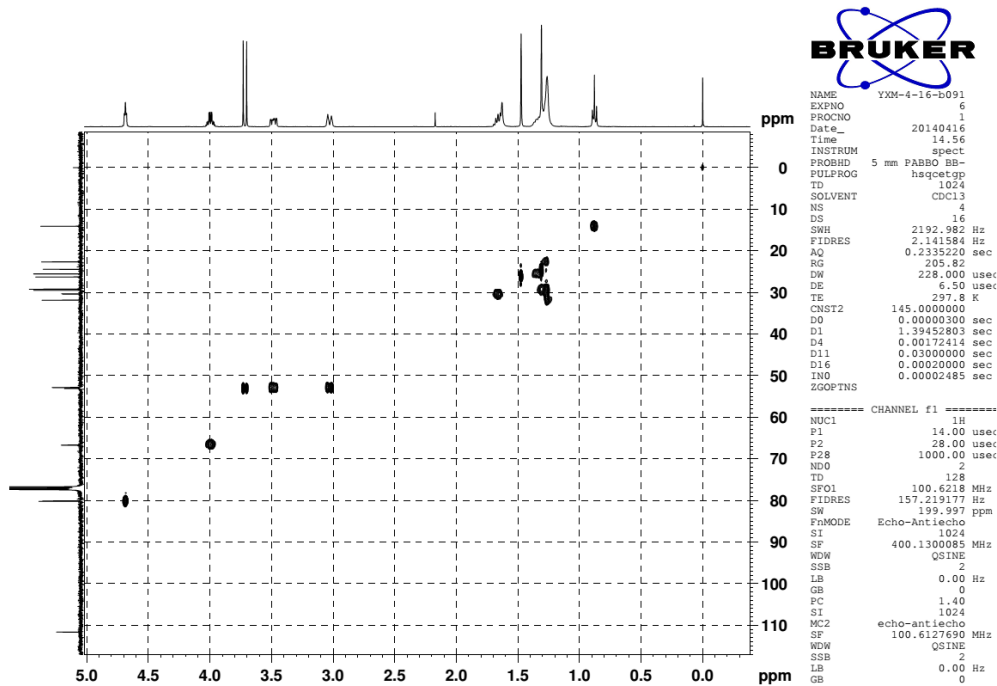

HSQC Spectrum of Compound **16k**

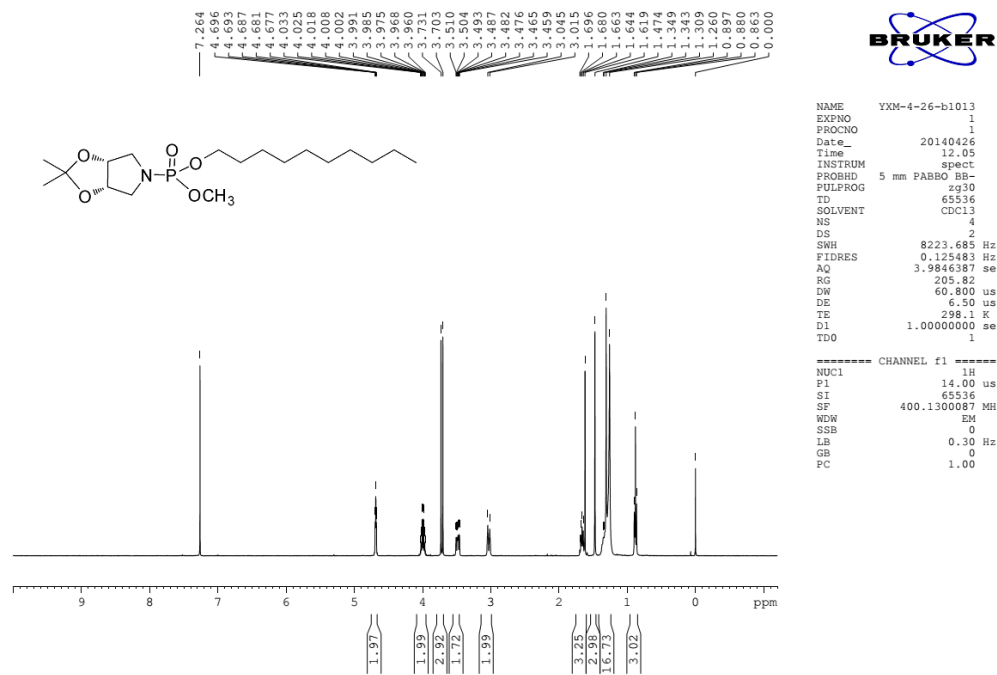

<sup>1</sup>H NMR Spectrum of Compound **16l**

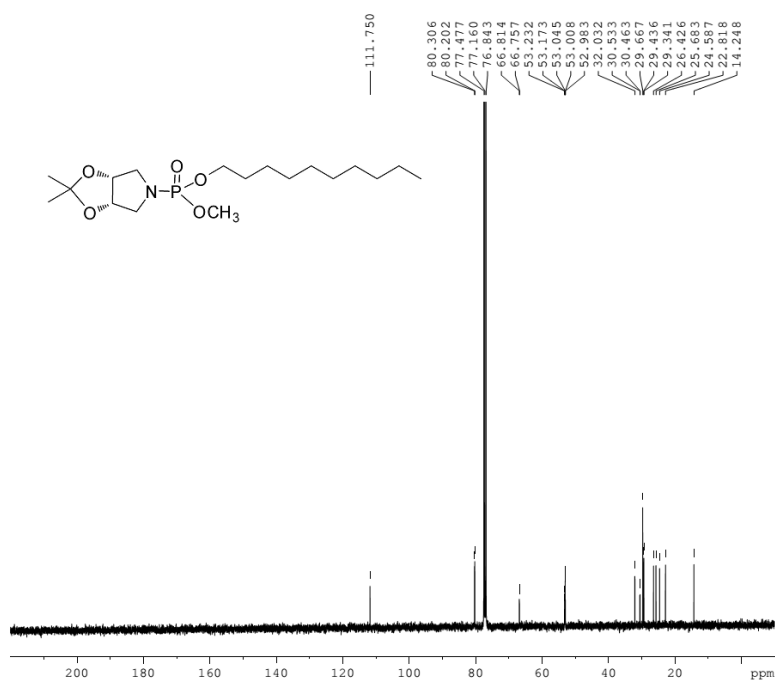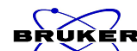

```

NAME      YXM-4-26-b1014
EXPNO     3
PROCNO    1
Date_     20140427
Time      20.59
INSTRUM   spect
PROBHD    5 mm PABBO BB-
PULPROG   zgpg30
TD         65536
SOLVENT   CDCl3
NS         944
DS         4
SWH       26041.666 Hz
FIDRES    0.397364 Hz
AQ         1.2583412 sec
RG         205.82
DW         19.200 usec
DE         6.50 usec
TE         299.3 K
D1         1.25000000 sec
D11        0.03000000 sec
TDO        1

----- CHANNEL f1 -----
NUC1       13C
P1         9.00 usec
SI         32768
SF         100.6127538 MHz
WDW        EM
SSB        0
LB         1.00 Hz
GB         0
PC         1.40

```

<sup>13</sup>C NMR Spectrum of Compound 16I

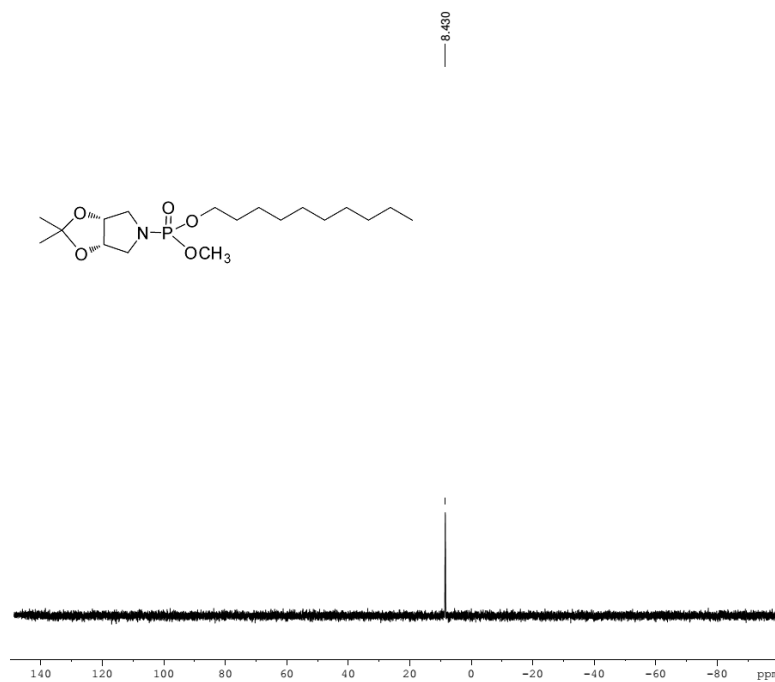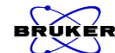

```

NAME      YXM-4-26-b1013
EXPNO     2
PROCNO    1
Date_     20140426
Time      12.07
INSTRUM   spect
PROBHD    5 mm PABBO BB-
PULPROG   zg30
TD         65536
SOLVENT   CDCl3
NS         32
DS         4
SWH       64102.563 Hz
FIDRES    0.978127 Hz
AQ         0.5112308 sec
RG         205.82
DW         7.800 usec
DE         6.50 usec
TE         298.1 K
D1         2.00000000 sec
TDO        1

----- CHANNEL f1 -----
NUC1       31P
P1         14.00 usec
SI         32768
SF         161.9754688 MHz
WDW        EM
SSB        0
LB         1.00 Hz
GB         0
PC         1.40

```

<sup>31</sup>P NMR Spectrum of Compound 16I

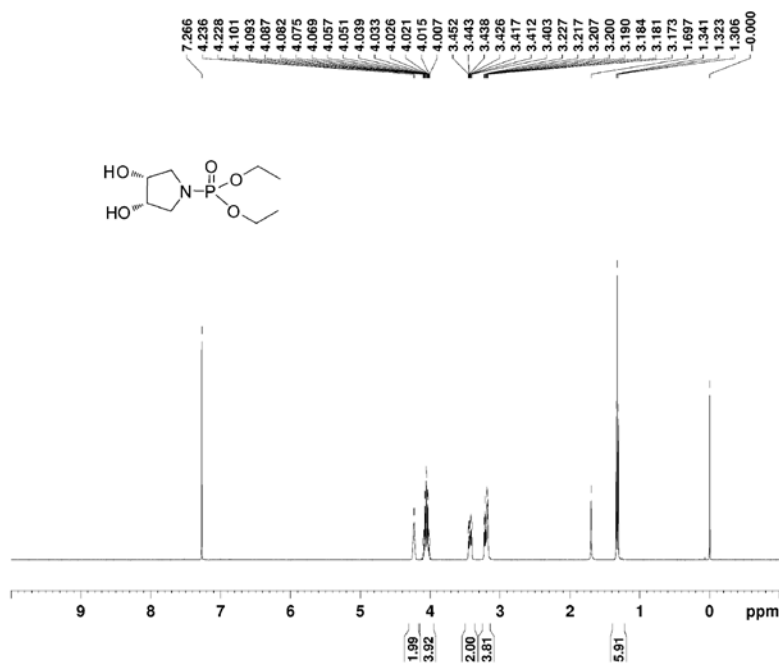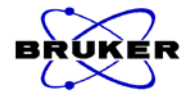

```

NAME yxm-12-25-p2
EXPNO 1
PROCNO 1
Date_ 20131225
Time 11.35
INSTRUM spect
PROBHD 5 mm PABBO BB-
PULPROG zg30
TD 65536
SOLVENT CDC13
NS 8
DS 2
SWH 8223.685 Hz
FIDRES 0.125483 Hz
AQ 3.9846387 sec
RG 205.82
DW 60.800 usec
DE 6.50 usec
TE 292.2 K
D1 1.0000000 sec
TD0 1

===== CHANNEL f1 =====
NUC1 1H
P1 14.00 usec
SI 65536
SF 400.1300000 MHz
WDW EM
SSB 0
LB 0.30 Hz
GB 0
PC 1.00
  
```

<sup>1</sup>H NMR Spectrum of Compound 8a

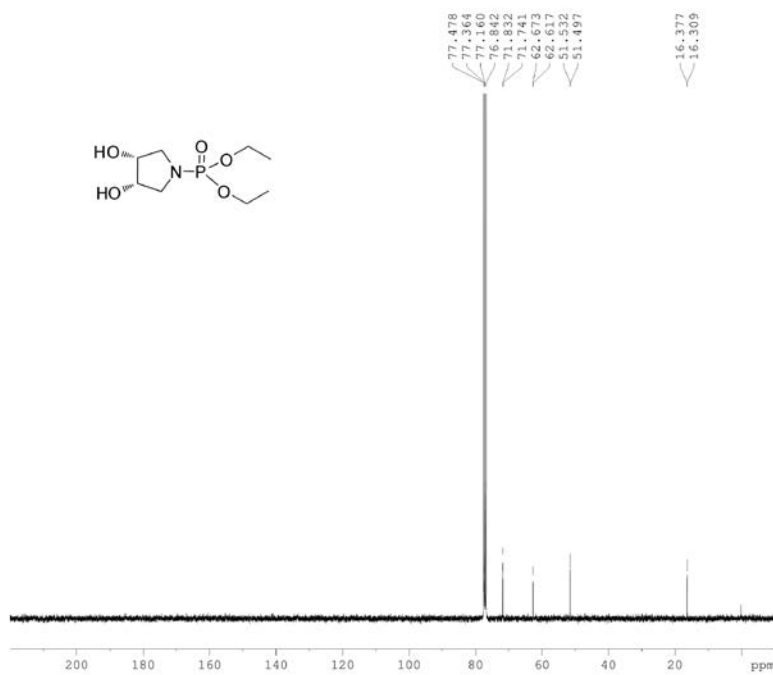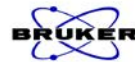

```

NAME yxm-12-25-p2
EXPNO 3
PROCNO 1
Date_ 20131225
Time 11.39
INSTRUM spect
PROBHD 5 mm PABBO BB-
PULPROG zgpg30
TD 65536
SOLVENT CDC13
NS 1024
DS 4
SWH 26041.666 Hz
FIDRES 0.397364 Hz
AQ 1.2583412 sec
RG 205.82
DW 19.200 usec
DE 6.50 usec
TE 293.1 K
D1 1.2500000 sec
D11 0.0300000 sec
TD0 1

===== CHANNEL f1 =====
NUC1 13C
P1 9.00 usec
SI 32768
SF 100.6127560 MHz
WDW RM
SSB 0
LB 1.00 Hz
GB 0
PC 1.40
  
```

<sup>13</sup>C NMR Spectrum of Compound 8a

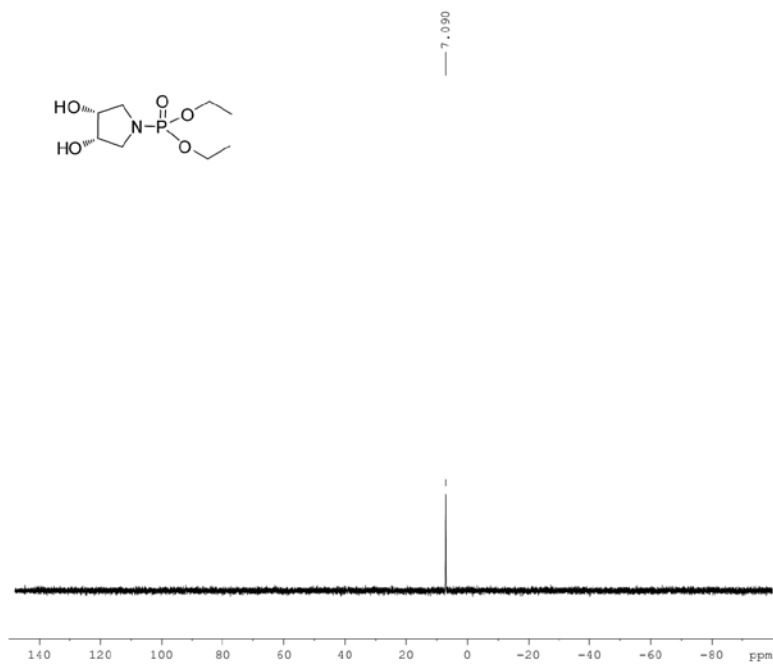

BRUKER

```

NAME      yxm-12-25-p2
EXPNO    2
PROCNO   1
Date_    20131225
Time     11.37
INSTRUM  spect
PROBHD   5 mm FABBO BB-
PULPROG  zg30
TD       65536
SOLVENT  CDCl3
NS       32
DS       4
SWH      64102.563 Hz
FIDRES   0.978127 Hz
AQ       0.5112308 sec
RG       205.82
DW       7.800 usec
DE       6.50 usec
TE       292.2 K
D1       2.0000000 sec
TDO      1
----- CHANNEL f1 -----
NUC1     31P
P1       14.00 usec
SI       32768
SF       161.9755930 MHz
WDW      EM
SSB      0
LB       1.00 Hz
GB       0
PC       1.40

```

<sup>31</sup>P NMR Spectrum of Compound 8a

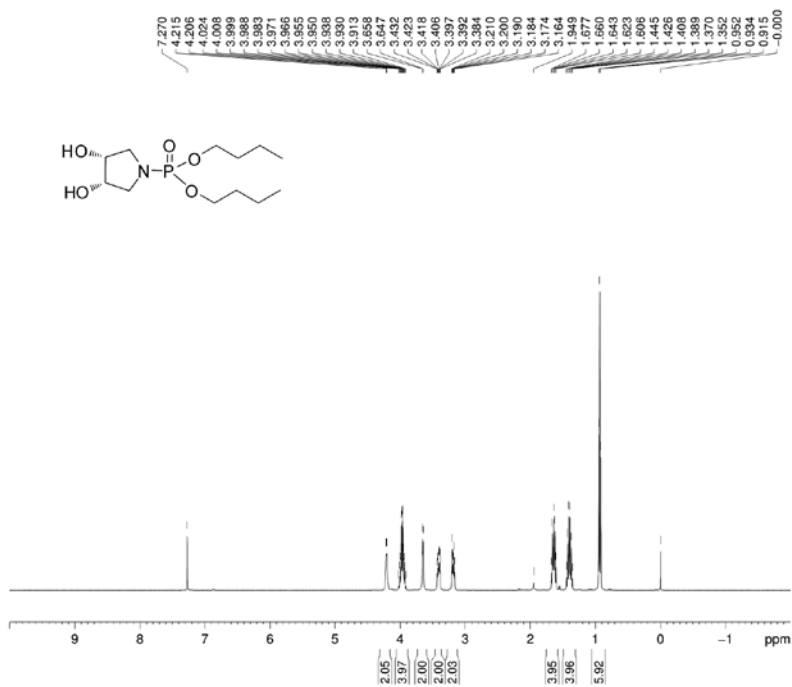

BRUKER

```

NAME      YXM-12-28-P-C4
EXPNO    1
PROCNO   1
Date_    20131228
Time     17.11
INSTRUM  spect
PROBHD   5 mm FABBO BB-
PULPROG  zg30
TD       65536
SOLVENT  CDCl3
NS       8
DS       2
SWH      8223.695 Hz
FIDRES   0.125483 Hz
AQ       3.9845387 sec
RG       123.55
DW       60.800 usec
DE       6.50 usec
TE       293.5 K
D1       1.0000000 sec
TDO      1
----- CHANNEL f1 -----
NUC1     1H
P1       14.00 usec
SI       65536
SF       400.1300062 MHz
WDW      EM
SSB      0
LB       0.30 Hz
GB       0
PC       1.00

```

<sup>1</sup>H NMR Spectrum of Compound 8b

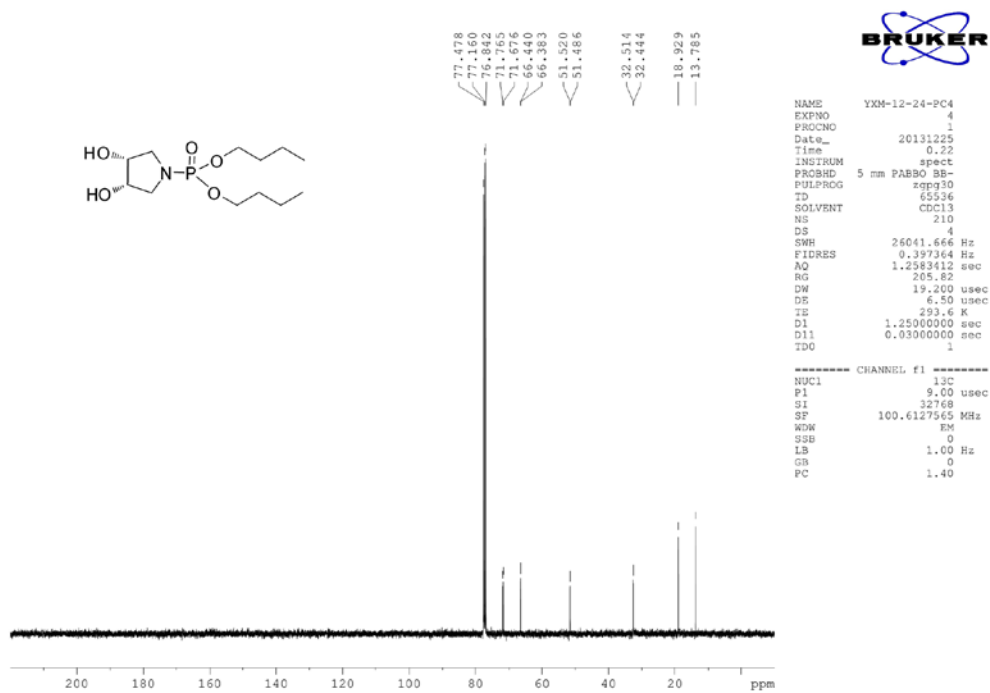

<sup>13</sup>C NMR Spectrum of Compound 8b

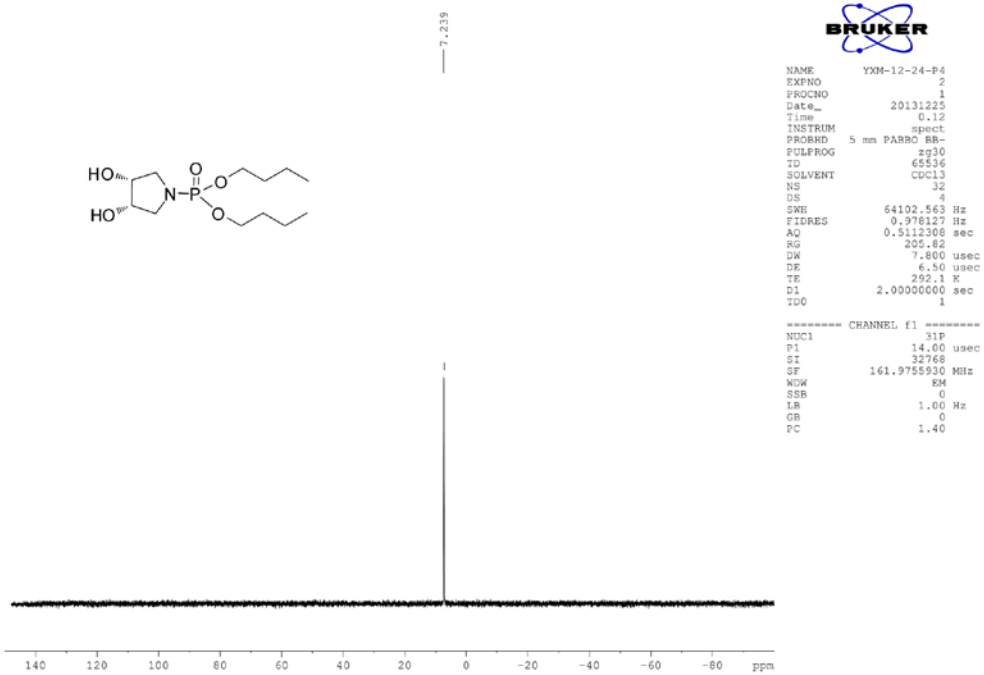

<sup>31</sup>P NMR Spectrum of Compound 8b

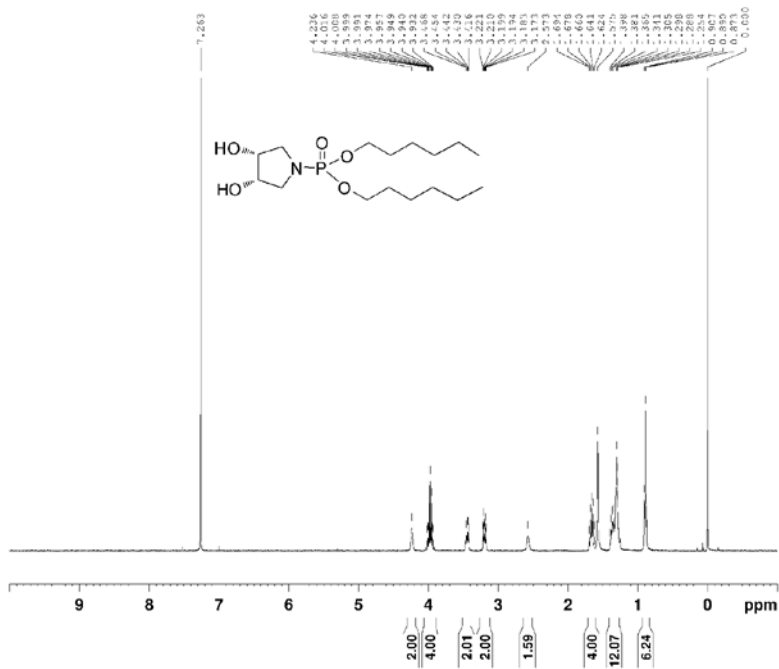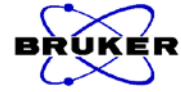

```

NAME      YXM-12-20-P6
EXPNO     2
PROCNO    20131220
Date_     12.22
Time      12.52
INSTRUM   spect
PROBHD    5 mm PABBO B3-
PULPROG   zg30
TD         65536
SOLVENT   CDCl3
NS         16
DS         2
SWH        8223.685 Hz
FIDRES     0.125482 Hz
AQ         3.9846327 sec
RG         205.82
DM         60.800 usec
DE         6.50 usec
TE         292.2 K
D1         1.00000000 sec
TD0        1

----- CHANNEL f1 -----
NUC1       1H
P1         14.00 usec
SI         65.834
SF         400.1300093 MHz
WDW        EM
SSB        0
LB         0.20 Hz
GB         0
PC         1.00
  
```

<sup>1</sup>H NMR Spectrum of Compound 8c

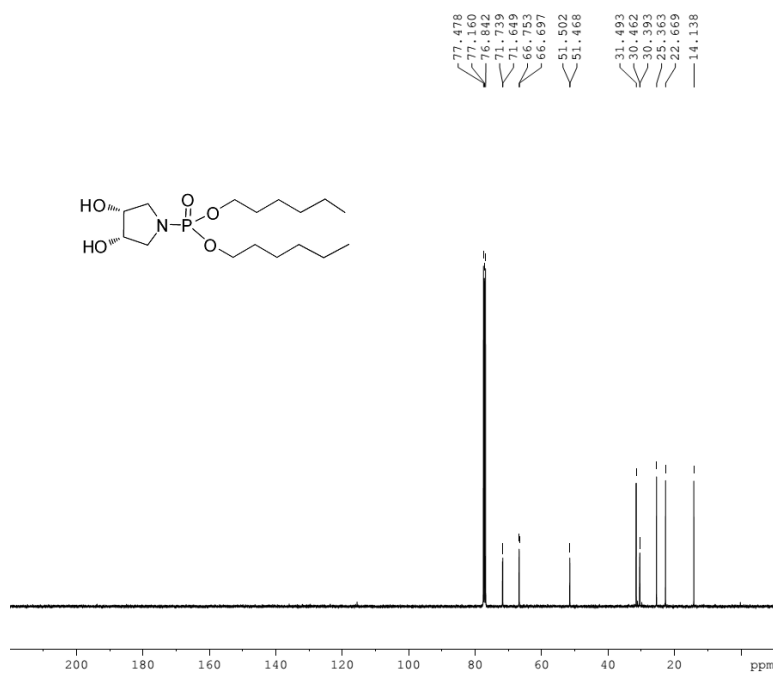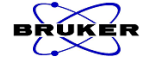

```

NAME      YXM-12-24-P6
EXPNO     3
PROCNO    20131225
Date_     1.53
Time      1.53
INSTRUM   spect
PROBHD    5 mm PABBO B3-
PULPROG   zgpg30
TD         65536
SOLVENT   CDCl3
NS         1024
DS         4
SWH        26041.666 Hz
FIDRES     0.397364 Hz
AQ         1.2583412 sec
RG         205.82
DM         19.200 usec
DE         6.50 usec
TE         294.0 K
D1         1.25000000 sec
D11        0.03000000 sec
TD0        1

----- CHANNEL f1 -----
NUC1       13C
P1         9.00 usec
SI         32768
SF         100.6127567 MHz
WDW        EM
SSB        0
LB         1.00 Hz
GB         0
PC         1.40
  
```

<sup>13</sup>C NMR Spectrum of Compound 8c

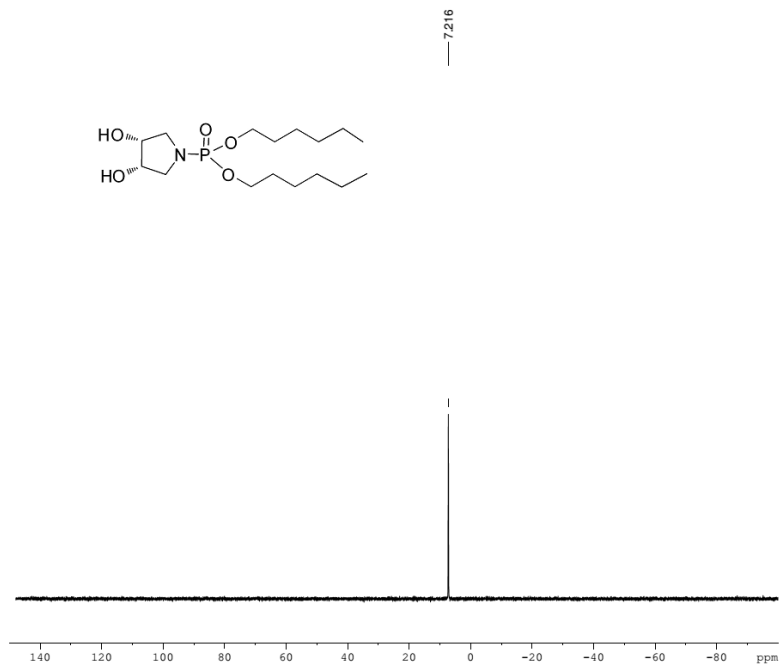

**BRUKER**

NAME YXM-12-24-P6  
 EXPNO 2  
 PROCNO 1  
 Date\_ 20131225  
 Time 1.07  
 INSTRUM spect  
 PROBHD 5 mm PABBO BB-  
 PULPROG zg30  
 TD 65536  
 SOLVENT CDCl3  
 NS 32  
 DS 4  
 SWH 64102.563 Hz  
 FIDRES 0.978127 Hz  
 AQ 0.5112308 sec  
 RG 205.82  
 DW 7.800 usec  
 DE 6.50 usec  
 TE 292.4 K  
 D1 2.0000000 sec  
 TDO 1

----- CHANNEL f1 -----  
 NUC1 31P  
 P1 14.00 usec  
 SI 32768  
 SF 161.9755930 MHz  
 WDW EM  
 SSB 0  
 LB 1.00 Hz  
 GB 0  
 PC 1.40

<sup>31</sup>P NMR Spectrum of Compound **8c**

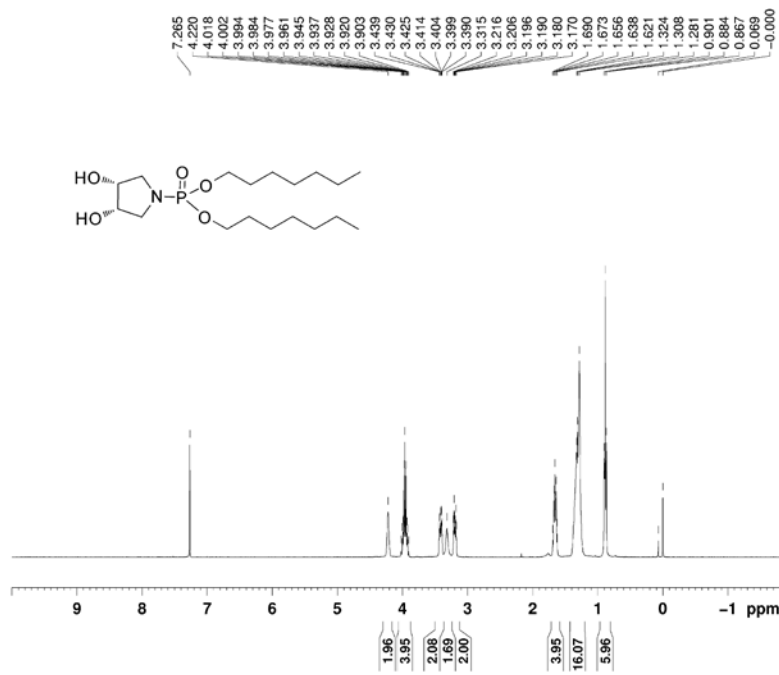

**BRUKER**

NAME YXM-3-22-P7  
 EXPNO 1  
 PROCNO 1  
 Date\_ 20140322  
 Time 10.40  
 INSTRUM spect  
 PROBHD 5 mm PABBO BB-  
 PULPROG zg30  
 TD 65536  
 SOLVENT CDCl3  
 NS 8  
 DS 2  
 SWH 8223.685 Hz  
 FIDRES 0.125483 Hz  
 AQ 3.9846387 sec  
 RG 161.46  
 DW 60.800 usec  
 DE 6.50 usec  
 TE 297.5 K  
 D1 1.0000000 sec  
 TDO 1

----- CHANNEL f1 -----  
 NUC1 1H  
 P1 14.00 usec  
 SI 65536  
 SF 400.1300083 MHz  
 WDW EM  
 SSB 0  
 LB 0.30 Hz  
 GB 0  
 PC 1.00

<sup>1</sup>H NMR Spectrum of Compound **8d**



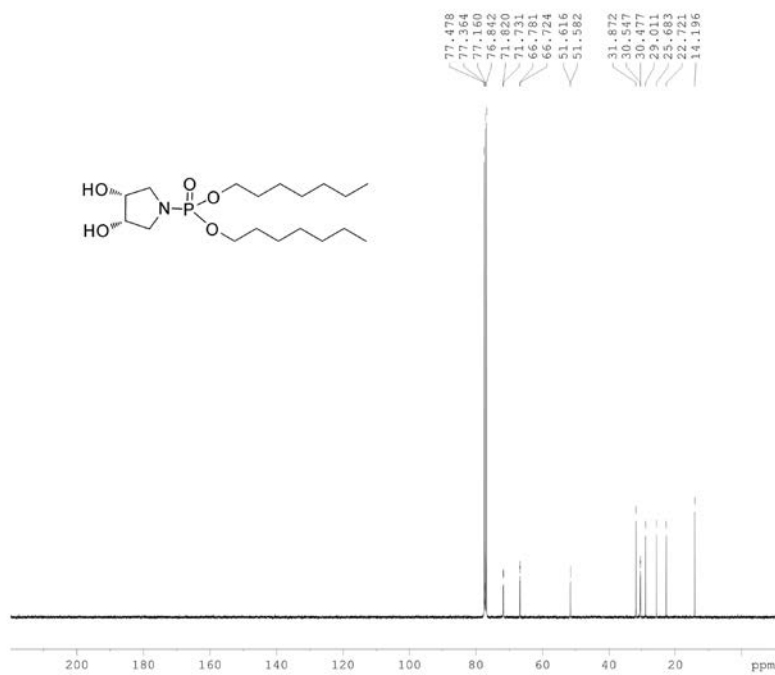

**BRUKER**

```

NAME      YXM-3-22-P71
EXPNO    3
PROCNO   1
Date_    20140323
Time     2.23
INSTRUM  spect
PROBHD   5 mm PABBO BB-
PULPROG  zgpg30
TD       65536
SOLVENT  CDCl3
NS       1500
DS       4
SWH      26041.666 Hz
FIDRES   0.397364 Hz
AQ       1.2583412 sec
RG       205.82
DW       19.200 usec
DE       6.50 usec
TE       299.3 K
D1       1.2500000 sec
D11      0.0300000 sec
TD0      1

===== CHANNEL f1 =====
NUC1     13C
P1       9.00 usec
SI       32768
SF       100.6127542 MHz
WDW      EM
SSB      0
LB       1.00 Hz
GB       0
PC       1.40

```

<sup>13</sup>C NMR Spectrum of Compound 8d

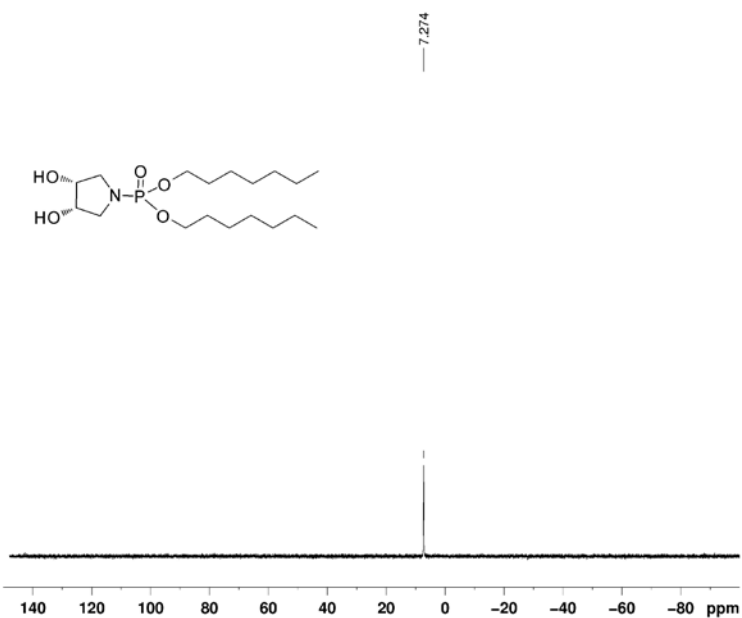

**BRUKER**

```

NAME      YXM-3-22-P71
EXPNO    2
PROCNO   1
Date_    20140323
Time     1.12
INSTRUM  spect
PROBHD   5 mm PABBO BB-
PULPROG  zg30
TD       65536
SOLVENT  CDCl3
NS       32
DS       4
SWH      64102.563 Hz
FIDRES   0.978127 Hz
AQ       0.5112309 sec
RG       205.82
DW       7.800 usec
DE       6.50 usec
TE       297.8 K
D1       2.0000000 sec
TD0      1

===== CHANNEL f1 =====
NUC1     31P
P1       14.00 usec
SI       32768
SF       161.9755930 MHz
WDW      EM
SSB      0
LB       1.00 Hz
GB       0
PC       1.40

```

<sup>31</sup>P NMR Spectrum of Compound 8d

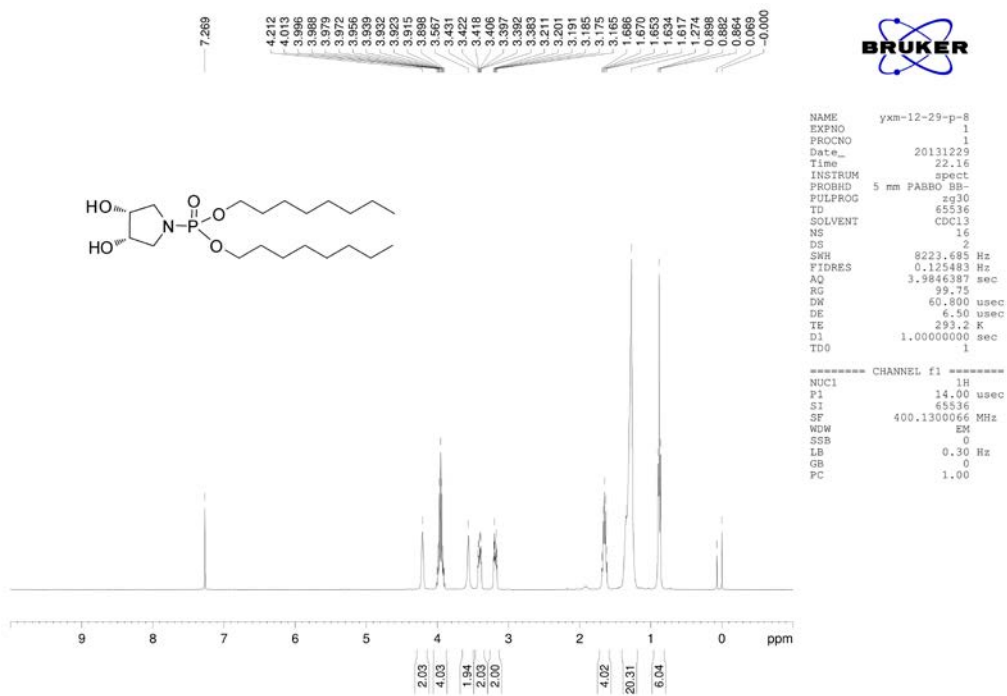

<sup>1</sup>H NMR Spectrum of Compound **8e**

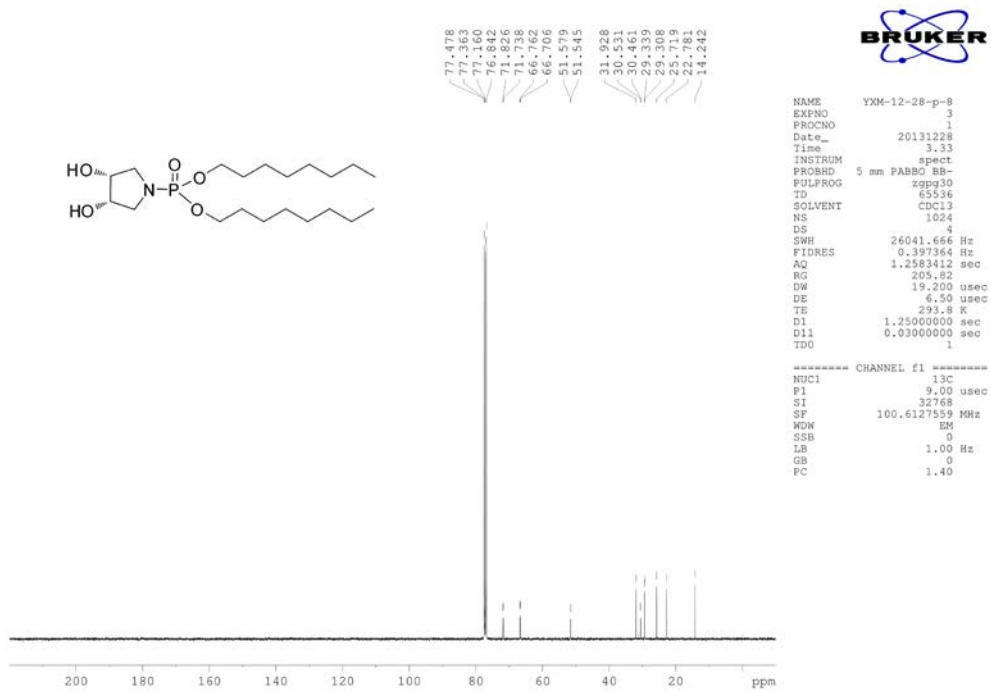

<sup>13</sup>C NMR Spectrum of Compound **8e**

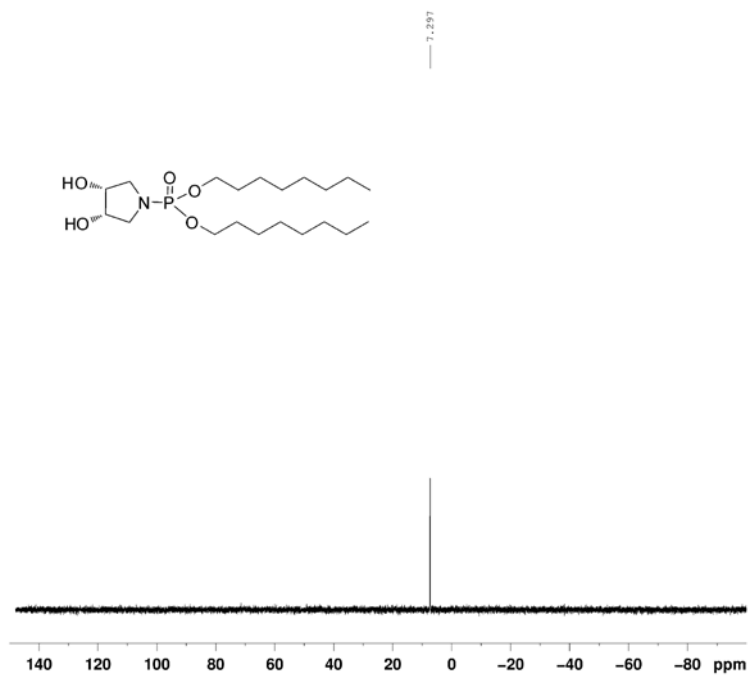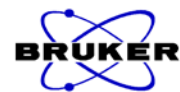

```

NAME      YXM-12-28-p-8
EXPNO    2
PROCNO   1
Date_    20131229
Time     2.42
INSTRUM  spect
PROBHD   5 mm PABBO BB-
PULPROG  zg30
TD        65536
SOLVENT  CDCl3
NS        32
DS        4
SWH      64102.563 Hz
FIDRES   0.978127 Hz
AQ        0.5112308 sec
RG        205.82
DW        7.800 usec
DE        6.50 usec
TE        292.4 K
D1        2.0000000 sec
TDO       1
  
```

```

----- CHANNEL f1 -----
NUC1      31P
P1        14.00 usec
SI        32768
SF        161.9755930 MHz
WDW       EM
SSB       0
LB        1.00 Hz
GB        0
PC        1.40
  
```

<sup>31</sup>P NMR Spectrum of Compound **8e**

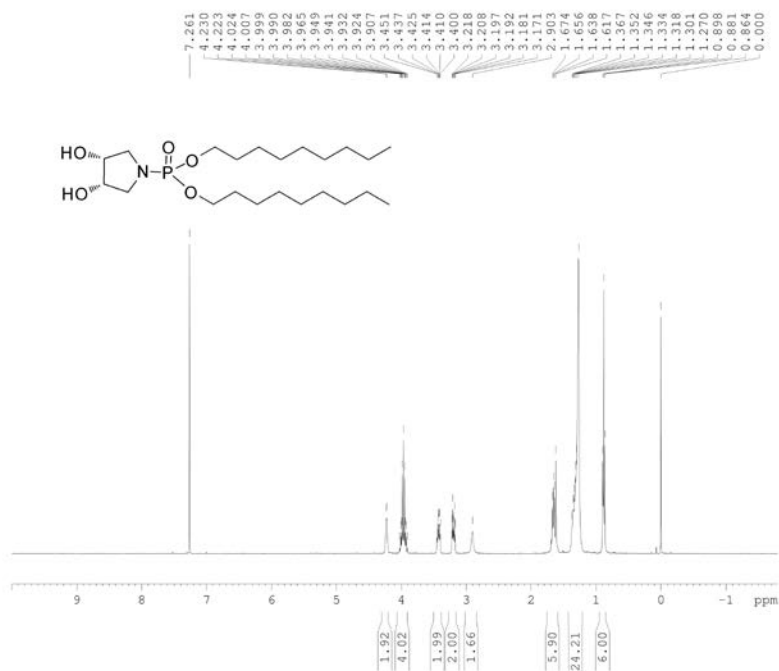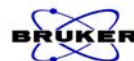

```

NAME      yxm-4-11-P-C9-1
EXPNO    1
PROCNO   1
Date_    20140411
Time     16.14
INSTRUM  spect
PROBHD   5 mm PADUL 13C
PULPROG  zg30
TD        65536
SOLVENT  CDCl3
NS        16
DS        2
SWH      8223.685 Hz
FIDRES   0.125483 Hz
AQ        3.9846387 se
RG        406
DW        60.800 us
DE        6.50 us
TE        309.0 K
D1        1.0000000 se
TDO       1
  
```

```

----- CHANNEL f1 -----
NUC1      1H
P1        13.00 us
PL1       0.00 dB
PL1W      9.46981144 W
SFO1      400.1524711 MH
SI        32768
SF        400.1500082 MH
WDW       EM
SSB       0
LB        0.30 Hz
GB        0
PC        1.00
  
```

<sup>1</sup>H NMR Spectrum of Compound **8f**

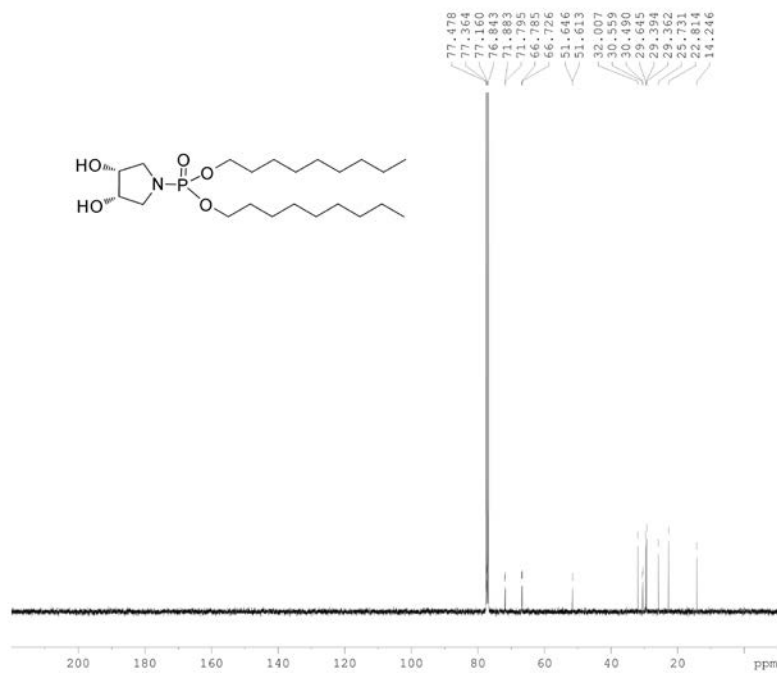

**BRUKER**

```

NAME      YXM-4-11-P-C9
EXPNO    3
PROCNO   1
Date_    20140411
Time     12.28
INSTRUM  spect
PROBHD   5 mm PABBO BB-
PULPROG  zgpg30
TD        65536
SOLVENT  CDCl3
NS        1024
DS        4
SWH       26041.666 Hz
FIDRES    0.397364 Hz
AQ        1.2583412 sec
RG        205.82
DW        19.200 usec
DE        6.50 usec
TE        298.3 K
D1        1.2500000 sec
D11       0.0300000 sec
TDO       1

===== CHANNEL f1 =====
NUC1      13C
P1        9.00 usec
SI        32768
SF        100.6127541 MHz
WDW       EM
SSB       0
LB        1.00 Hz
GB        0
PC        1.40

```

<sup>13</sup>C NMR Spectrum of Compound **8f**

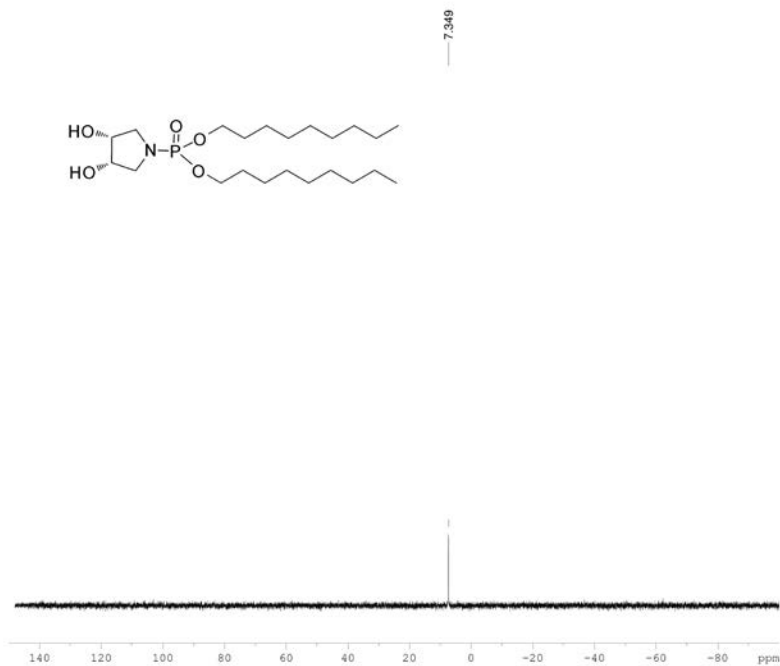

**BRUKER**

```

NAME      YXM-4-11-P-C9
EXPNO    2
PROCNO   1
Date_    20140411
Time     11.42
INSTRUM  spect
PROBHD   5 mm PABBO BB-
PULPROG  zg30
TD        65536
SOLVENT  CDCl3
NS        32
DS        4
SWH       64102.563 Hz
FIDRES    0.978127 Hz
AQ        0.5112308 sec
RG        205.82
DW        7.800 usec
DE        6.50 usec
TE        296.5 K
D1        2.0000000 sec
TDO       1

===== CHANNEL f1 =====
NUC1      31P
P1        14.00 usec
SI        32768
SF        161.9755930 MHz
WDW       EM
SSB       0
LB        1.00 Hz
GB        0
PC        1.40

```

<sup>31</sup>P NMR Spectrum of Compound **8f**

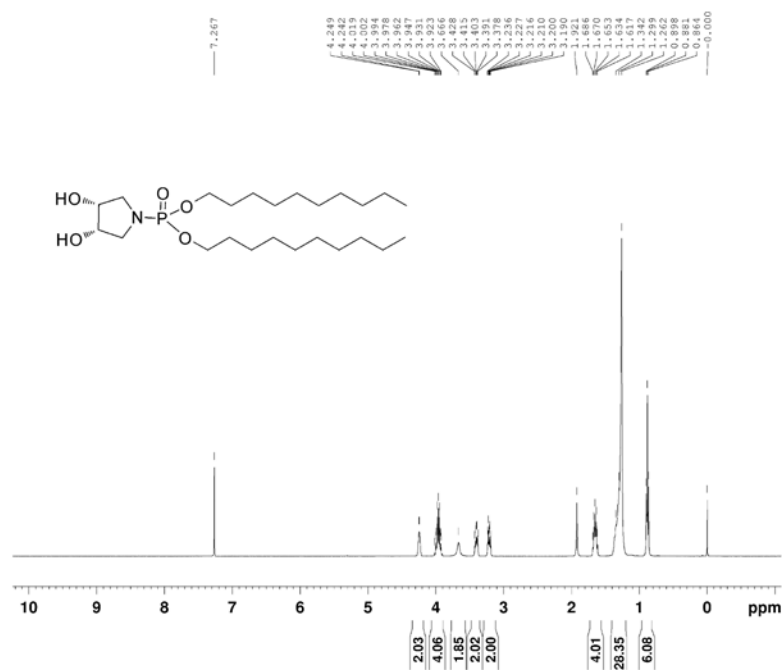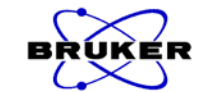

```

NAME      YXM-12-27-p-10
EXPNO     1
PROCNO    1
Date_     20131227
Time      20.29
INSTRUM   spect
PROBHD    5 mm PABBO BB-
PULPROG   zg30
TD        65536
SOLVENT   CDCl3
NS        3
DS        2
SWH       8223.685 Hz
FIDRES    0.175483 Hz
AQ        3.9846387 sec
RG        137.88
DW        60.800 usec
DE        6.50 usec
TE        292.2 K
D1        1.00000000 sec
TD0       1
  
```

```

===== CHANNEL f1 =====
NUC1      1H
P1        14.00 usec
SI        65536
SF        400.1300075 MHz
WDW       EM
SSB       0
LB        0.30 Hz
GB        0
PC        1.00
  
```

<sup>1</sup>H NMR Spectrum of Compound 8g

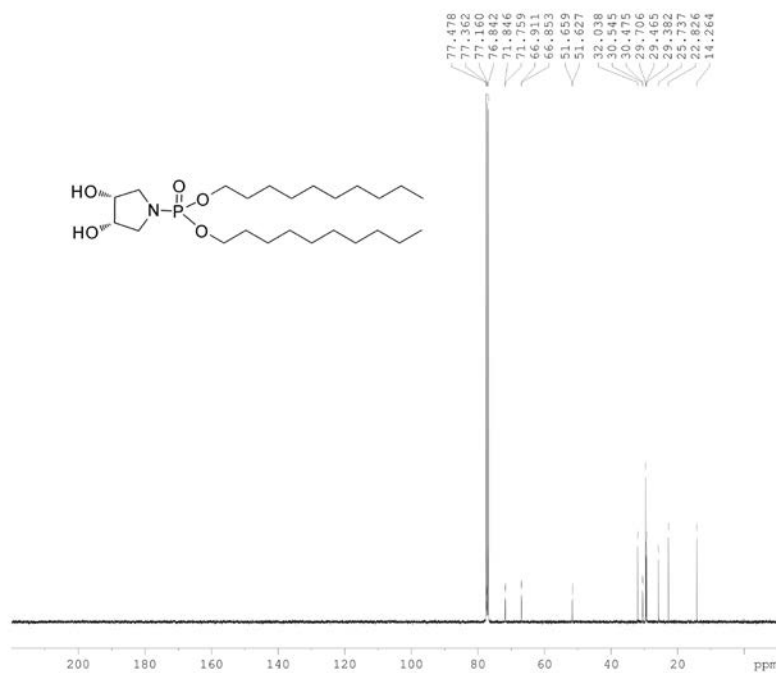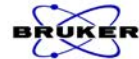

```

NAME      YXM-12-28-p-10
EXPNO     3
PROCNO    1
Date_     20131228
Time      2.33
INSTRUM   spect
PROBHD    5 mm PABBO BB-
PULPROG   zgpg30
TD        65536
SOLVENT   CDCl3
NS        1024
DS        4
SWH       26041.666 Hz
FIDRES    0.397364 Hz
AQ        1.2583412 sec
RG        205.82
DW        19.200 usec
DE        6.50 usec
TE        293.9 K
D1        1.25000000 sec
D11       0.03000000 sec
TD0       1
  
```

```

===== CHANNEL f1 =====
NUC1      13C
P1        9.00 usec
SI        32768
SF        100.6127560 MHz
WDW       EM
SSB       0
LB        1.00 Hz
GB        0
PC        1.40
  
```

<sup>13</sup>C NMR Spectrum of Compound 8g

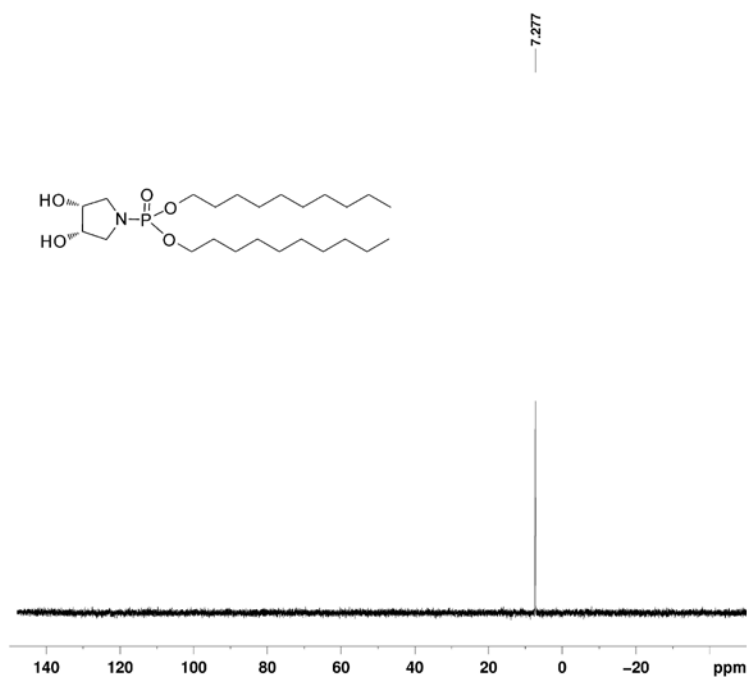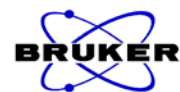

```

NAME      YXM-12-28-P10
EXPNO     2
PROCNO    1
Date_     20131228
Time      12.48
INSTRUM   spect
PROBHD    5 mm PABBO BB-
PULPROG   zg30
TD         65536
SOLVENT   CDCl3
NS         32
DS         4
SWH       64102.563 Hz
FIDRES    0.978127 Hz
AQ         0.5112308 sec
RG         205.82
DW         7.800 usec
DE         6.50 usec
TE         292.6 K
D1         2.00000000 sec
TDO        1
  
```

```

----- CHANNEL f1 -----
NUC1      31P
P1         14.00 usec
SI         32768
SF         161.9755930 MHz
WDW        EM
SSB        0
LB         1.00 Hz
GB         0
PC         1.40
  
```

<sup>31</sup>P NMR Spectrum of Compound **8g**

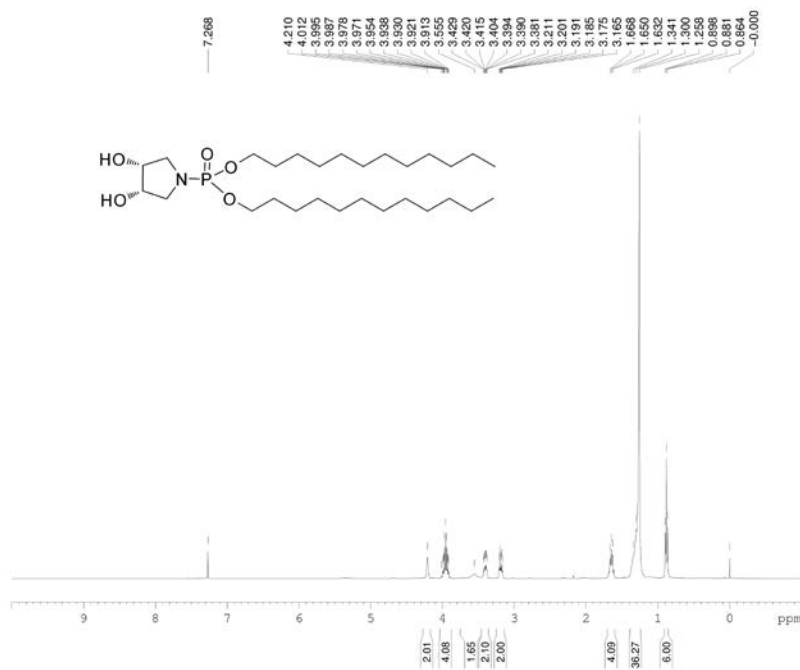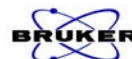

```

NAME      YXM-3-14-P12
EXPNO     1
PROCNO    1
Date_     20140314
Time      11.07
INSTRUM   spect
PROBHD    5 mm PABBO BB-
PULPROG   zg30
TD         65536
SOLVENT   CDCl3
NS         8
DS         2
SWH       8223.685 Hz
FIDRES    0.125483 Hz
AQ         3.9846387 sec
RG         80.41
DW         69.800 usec
DE         6.50 usec
TE         294.6 K
D1         1.00000000 sec
TDO        1
  
```

```

----- CHANNEL f1 -----
NUC1      1H
P1         14.00 usec
SI         65536
SF         400.1300070 MHz
WDW        EM
SSB        0
LB         0.30 Hz
GB         0
PC         1.00
  
```

<sup>1</sup>H NMR Spectrum of Compound **8h**

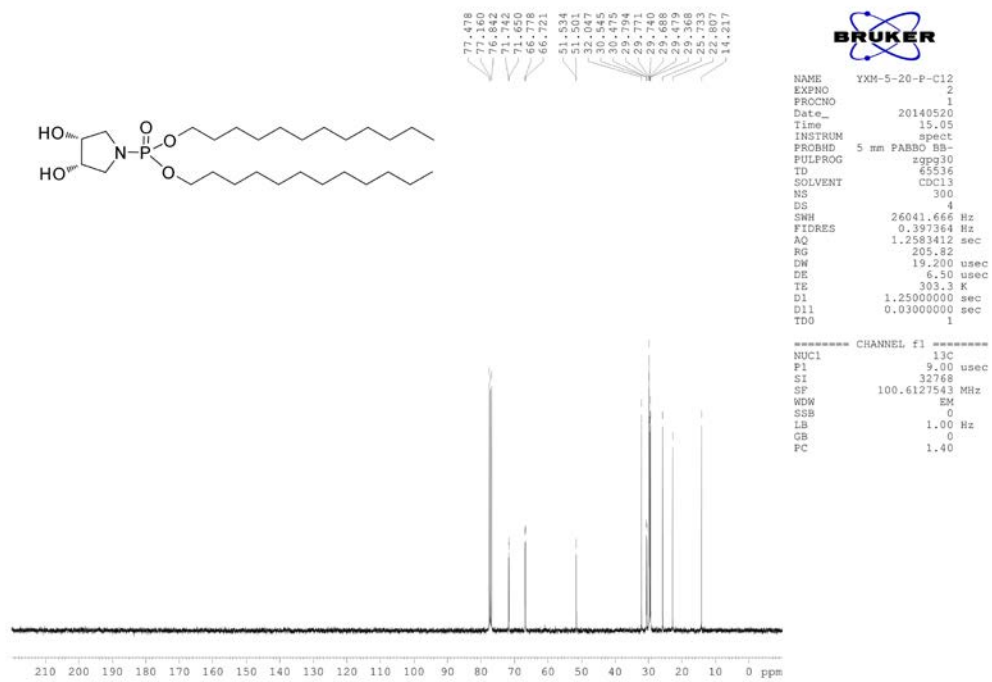

$^{13}\text{C}$  NMR Spectrum of Compound **8h**

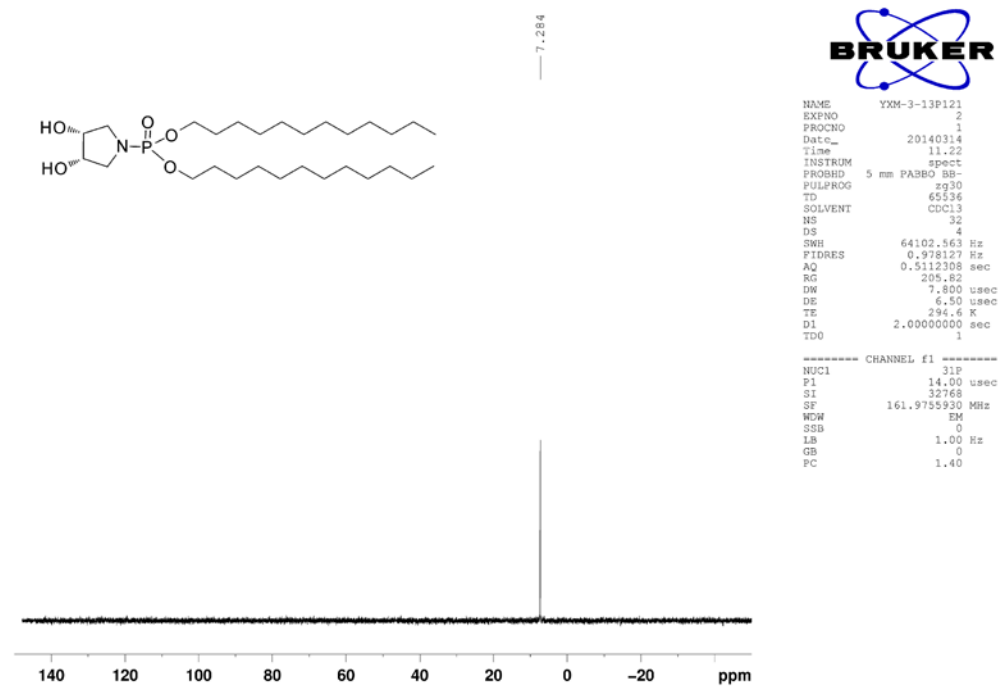

$^{31}\text{P}$  NMR Spectrum of Compound **8h**

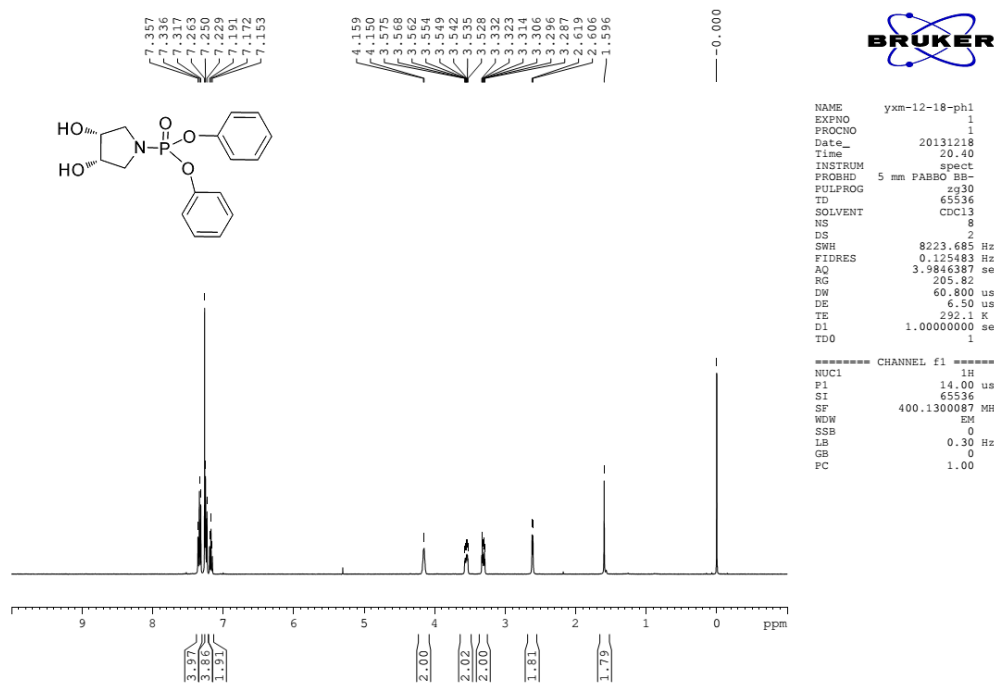

<sup>1</sup>H NMR Spectrum of Compound **8i**

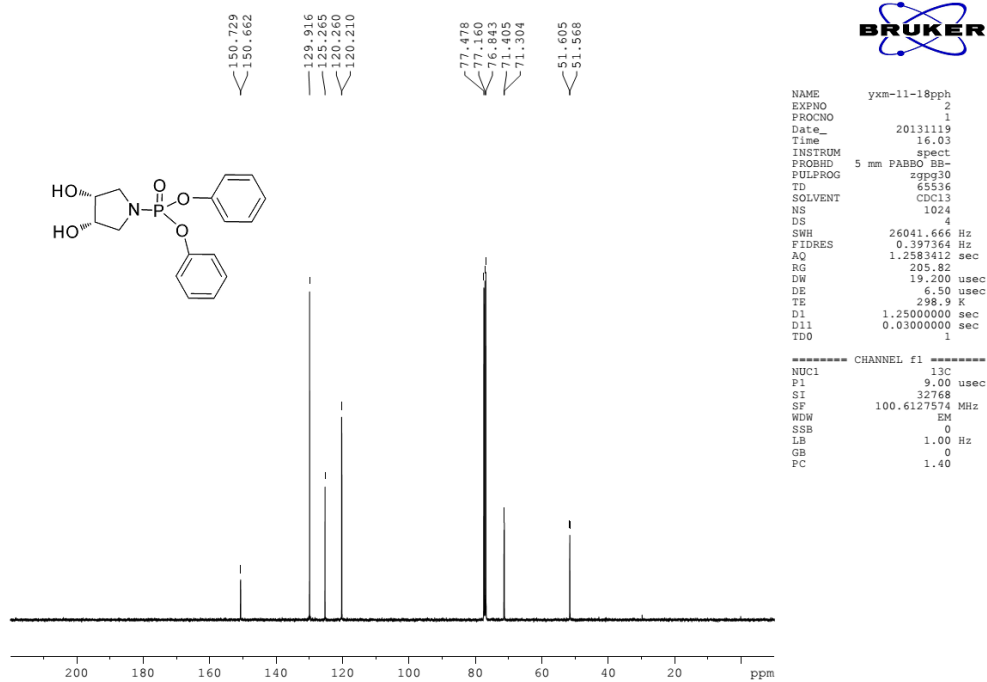

<sup>13</sup>C NMR Spectrum of Compound **8i**



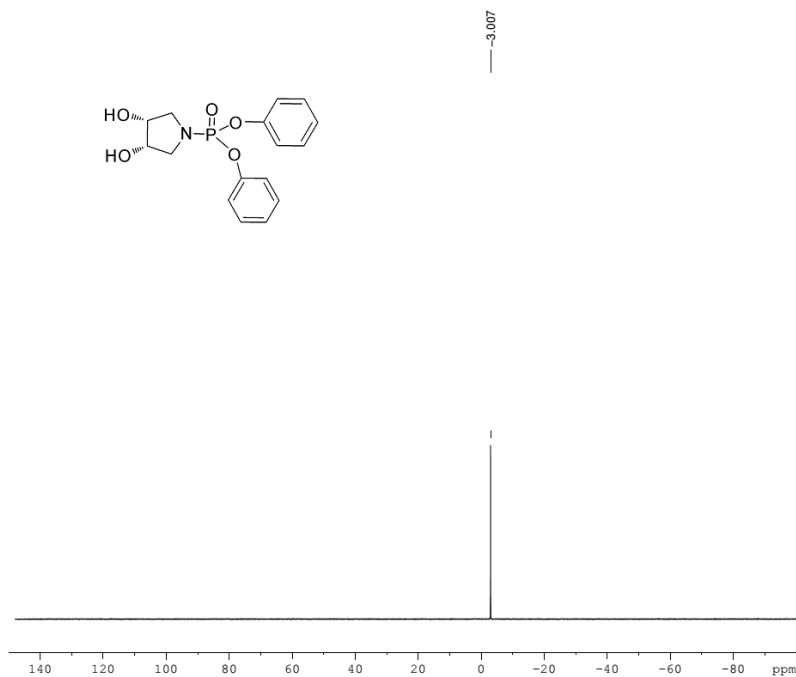

<sup>31</sup>P NMR Spectrum of Compound 8i

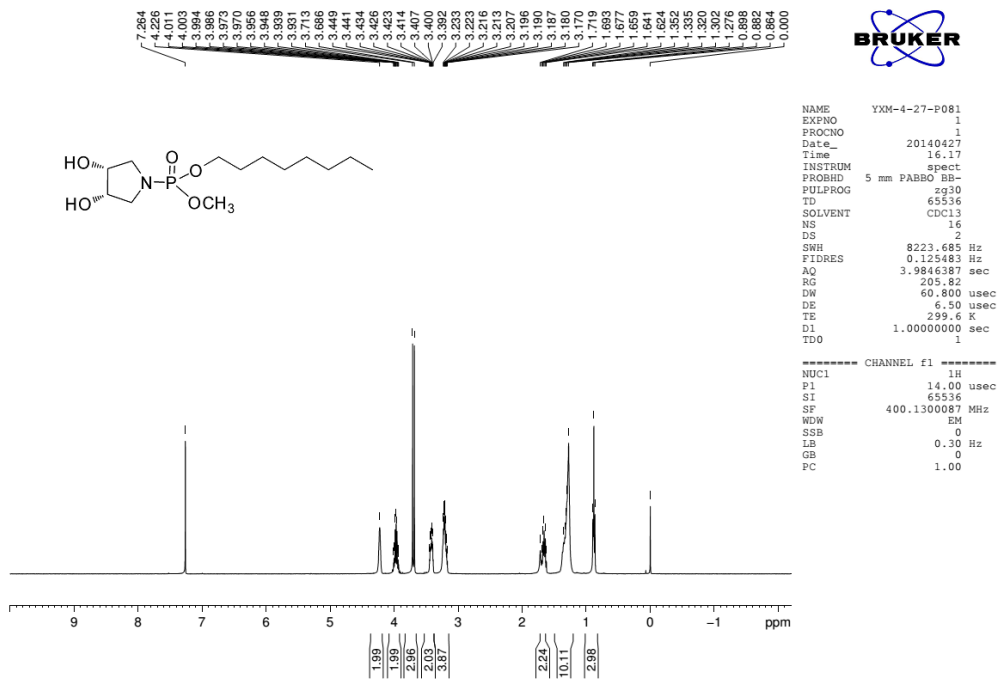

<sup>1</sup>H NMR Spectrum of Compound 8j

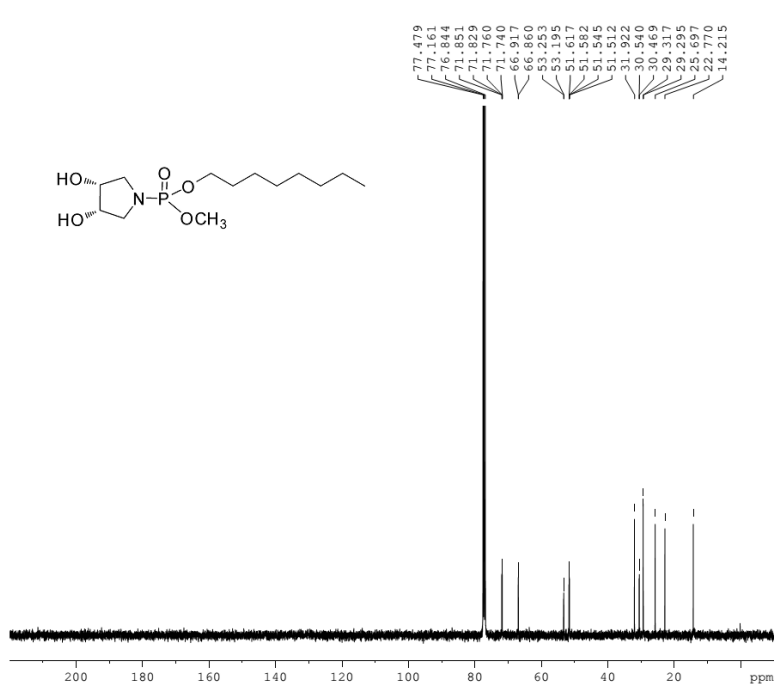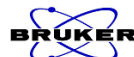

```

NAME      YXM-4-27-P081
EXPNO    4
PROCNO   1
Date_    20140427
Time     16.25
INSTRUM  spect
PROBHD   5 mm PABBO BB-
PULPROG  zgpg30
TD       65536
SOLVENT  CDCl3
NS       1500
DS       4
SWH      26041.666 Hz
FIDRES   0.397364 Hz
AQ       1.2583412 sec
RG       205.82
DW       19.200 usec
DE       6.50 usec
TE       300.8 K
D1       1.25000000 sec
D11      0.03000000 sec
TDO      1

----- CHANNEL f1 -----
NUC1     13C
P1       9.00 usec
SI       32768
SF       100.6127532 MHz
WDW      EM
SSB      0
LB       1.00 Hz
GB       0
PC       1.40

```

<sup>13</sup>C NMR Spectrum of Compound 8j

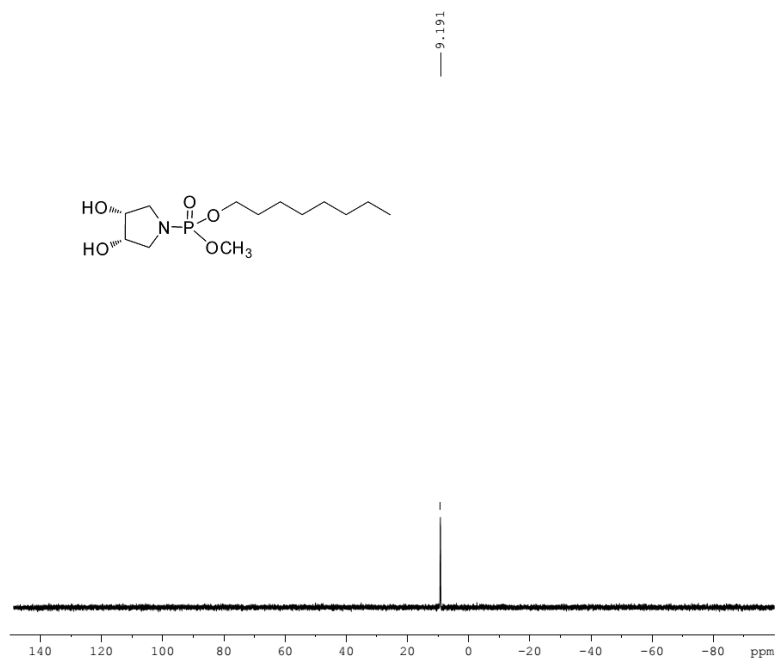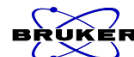

```

NAME      YXM-4-27-P081
EXPNO    2
PROCNO   1
Date_    20140427
Time     16.20
INSTRUM  spect
PROBHD   5 mm PABBO BB-
PULPROG  zg30
TD       65536
SOLVENT  CDCl3
NS       32
DS       4
SWH      64102.563 Hz
FIDRES   0.978127 Hz
AQ       0.5112308 sec
RG       205.82
DW       7.800 usec
DE       6.50 usec
TE       299.7 K
D1       2.00000000 sec
TDO      1

----- CHANNEL f1 -----
NUC1     31P
P1       14.00 usec
SI       32768
SF       161.9754688 MHz
WDW      EM
SSB      0
LB       1.00 Hz
GB       0
PC       1.40

```

<sup>31</sup>P NMR Spectrum of Compound 8j

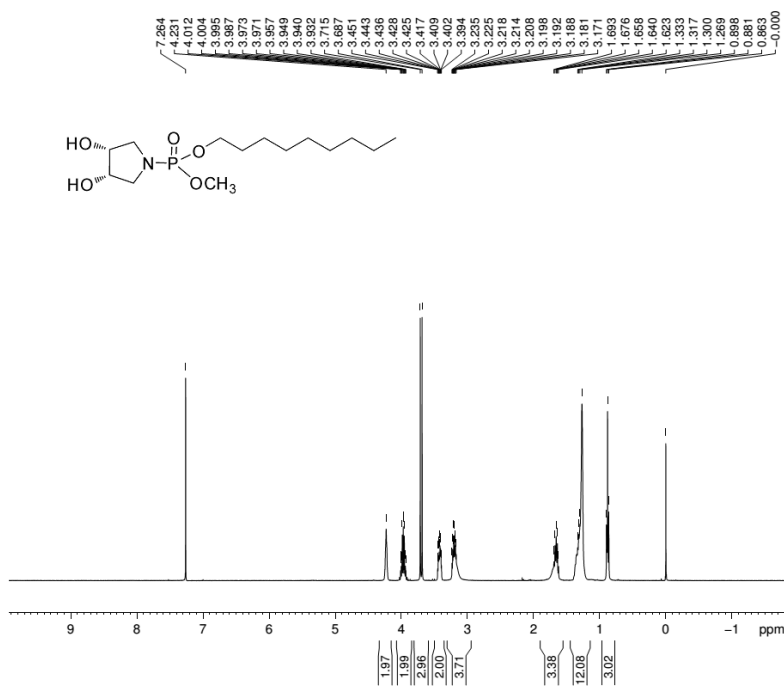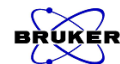

```

NAME      YXM-4-18-P091
EXPNO    1
PROCNO   1
Date_    20140418
Time     16.02
INSTRUM  spect
PROBHD   5 mm PABBO BP-
PULPROG  zg30
TD        65536
SOLVENT  CDC13
NS        8
DS        2
SWH      8223.685 Hz
FIDRES   0.125483 Hz
AQ        3.9846387 sec
RG        205.82
DW        60.800 usec
DE        6.50 usec
TE        297.4 K
D1        1.0000000 sec
TD0       1
===== CHANNEL f1 =====
NUC1      1H
P1        14.00 usec
SI        65536
SF        400.1300087 MHz
WDW       EM
SSB       0
LB        0.30 Hz
GB        0
PC        1.00
  
```

<sup>1</sup>H NMR Spectrum of Compound 8k

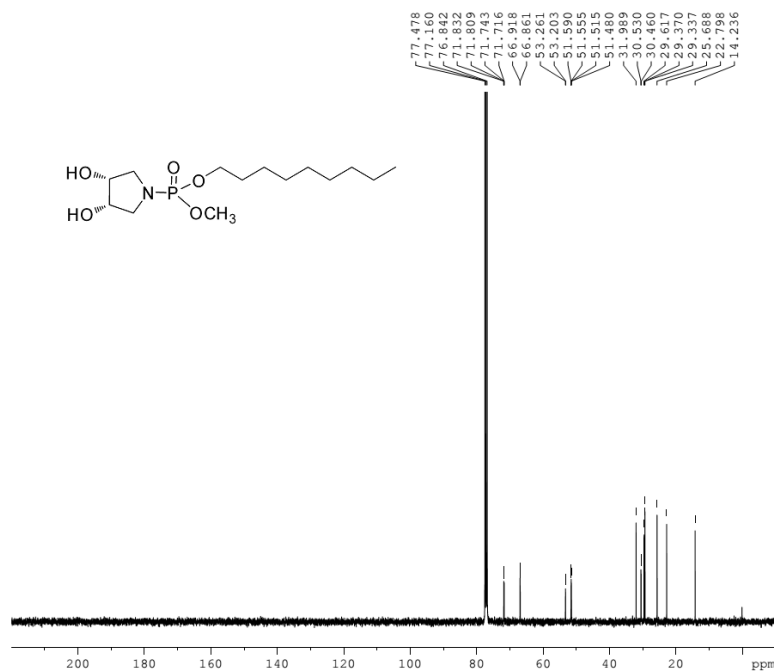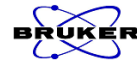

```

NAME      YXM-4-17-P091
EXPNO    3
PROCNO   1
Date_    20140417
Time     19.25
INSTRUM  spect
PROBHD   5 mm PABBO BP-
PULPROG  zgpg30
TD        65536
SOLVENT  CDC13
NS        1800
DS        4
SWH      26041.666 Hz
FIDRES   0.397364 Hz
AQ        1.2583412 sec
RG        205.82
DW        19.200 usec
DE        6.50 usec
TE        299.0 K
D1        1.2500000 sec
D11       0.0300000 sec
TD0       1
===== CHANNEL f1 =====
NUC1      13C
P1        9.00 usec
SI        32768
SF        100.6127543 MHz
WDW       EM
SSB       0
LB        1.00 Hz
GB        0
PC        1.40
  
```

<sup>13</sup>C NMR Spectrum of Compound 8k

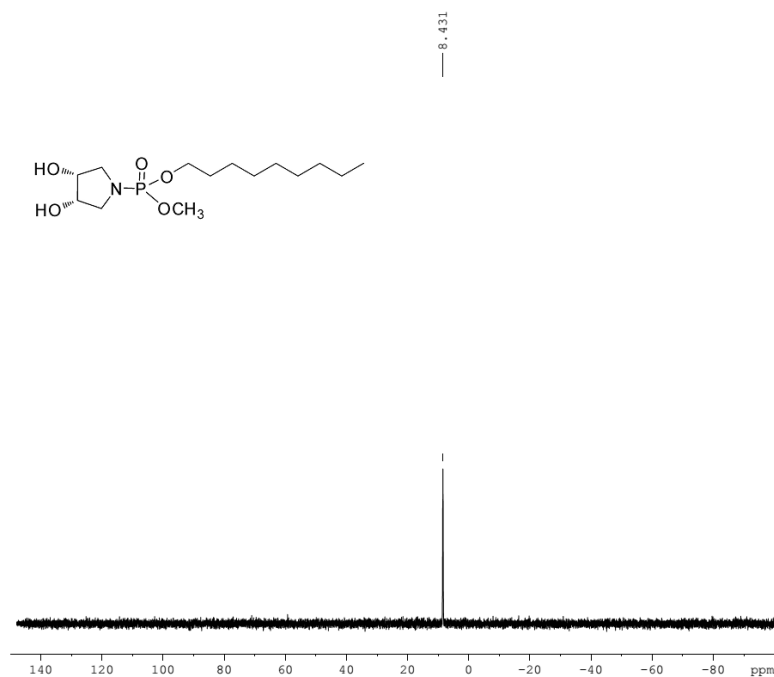

<sup>31</sup>P NMR Spectrum of Compound **8k**

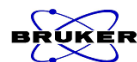

```

NAME      YXM-4-17-P091
EXPNO    2
PROCNO   1
Date_    20140417
Time     18.06
INSTRUM  spect
PROBHD   5 mm PABBO BB-
PULPROG  zg30
TD        65536
SOLVENT  CDCl3
NS        32
DS        4
SWH      64102.563 Hz
FIDRES   0.978127 Hz
AQ        0.5112308 sec
RG        205.82
DW        7.800 usec
DE        6.50 usec
TE        297.4 K
D1        2.0000000 sec
TDO       1
  
```

```

===== CHANNEL f1 =====
NUC1      31P
P1        14.00 usec
SI        32768
SF        161.9755930 MHz
WDW       EM
SSB       0
LB        1.00 Hz
GB        0
PC        1.40
  
```

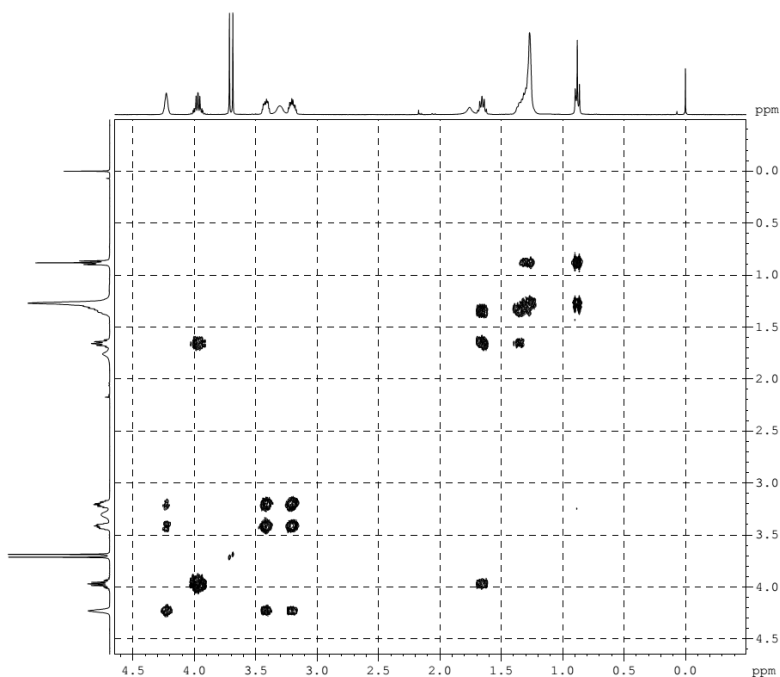

H-H COSY Spectrum of Compound **8k**

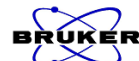

```

NAME      YXM-4-17-P0914
EXPNO    5
PROCNO   1
Date_    20140417
Time     20.22
INSTRUM  spect
PROBHD   5 mm PABBO BB-
PULPROG  cosygpmfgf
TD        2048
SOLVENT  CDCl3
NS        4
DS        16
SWH      2057.613 Hz
FIDRES   1.004694 Hz
AQ        0.4977140 sec
RG        205.82
DW        243.000 usec
DE        6.50 usec
TE        297.2 K
D0        0.00000300 sec
D1        1.7583595 sec
D13       0.00000400 sec
D16       0.00020000 sec
IND       0.00048600 sec
  
```

```

===== CHANNEL f1 =====
NUC1      1H
P1        14.00 usec
NDO       1
TD        128
SFO1     400.13008 MHz
FIDRES   16.075104 Hz
SW        5.142 ppm
FHM0     QF
SI        1024
SF        400.1300082 MHz
WDW       SINE
SSB       0
LB        0.00 Hz
GB        0
PC        1.40
SI        1024
MC2       QF
SF        400.1300082 MHz
WDW       SINE
SSB       0
LB        0.00 Hz
GB        0
  
```

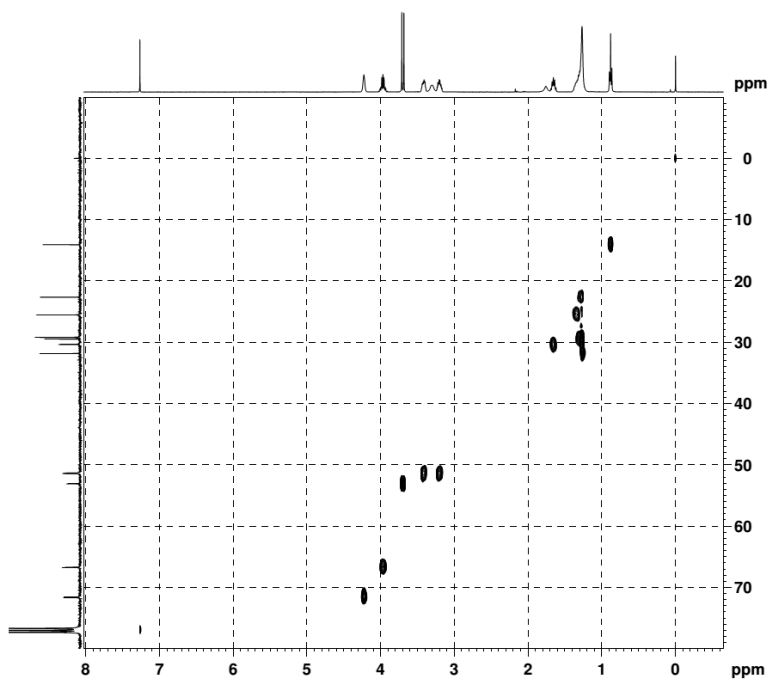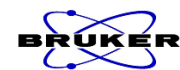

```

NAME      YXM-4-17-P091
EXPNO    4
PROCNO   1
Date_    20140417
Time     20.02
INSTRUM  spect
PROBHD   5 mm PABBO BB-
PULPROG  hsqcetgp
TD       1024
SOLVENT  CDC13
NS       4
DS       16
SWH      3472.222 Hz
FIDRES   3.390842 Hz
AQ       0.1475060 sec
RG       205.82
DW       144.000 use
DE       6.50 use
TE       297.4 K
CNST2    145.000000
DO       0.0000300 sec
D1       1.48054397 sec
D4       0.00172414 sec
D11      0.03000000 sec
D16      0.00020000 sec
INO      0.00002485 sec
ZGPTNS   1
  
```

```

===== CHANNEL f1 =====
NUC1    1H
P1      14.00 use
P2      28.00 use
PZ8     1000.00 use
NDO     2
TD      128
SF01    100.6218 MHz
FIDRES  157.219177 Hz
SW      199.997 ppm
FMODE   Echo-Antiecho
SI      1024
SF      400.1300083 MHz
WDW     QSINE
SSB     2
LB      0.00 Hz
GB      0
PC      1.40
SI      1024
MC2     echo-antiecho
SF      100.617690 MHz
WDW     QSINE
SSB     2
LB      0.00 Hz
GB      0
  
```

HSQC Spectrum of Compound 8k

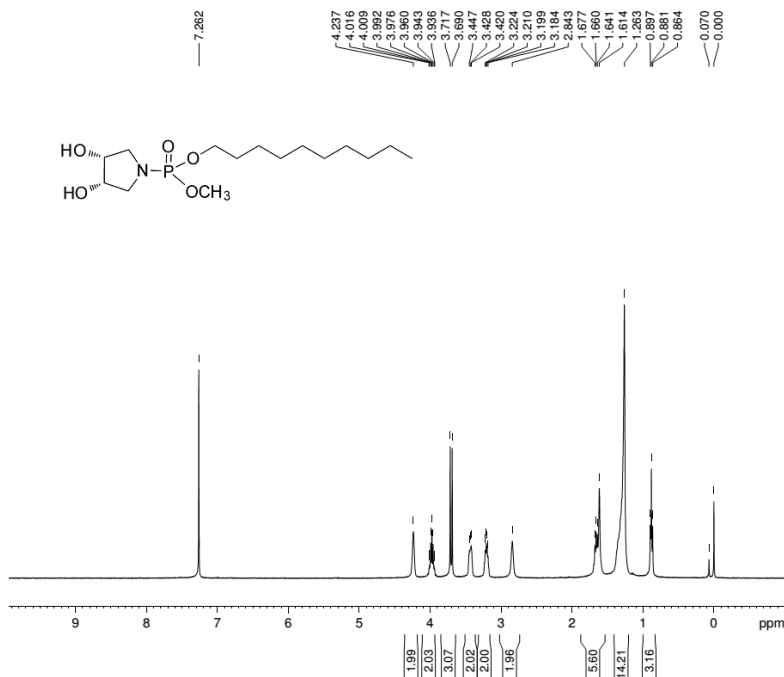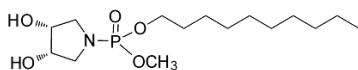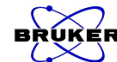

```

NAME      YXM-4-26-P1011
EXPNO    1
PROCNO   1
Date_    20140426
Time     9.42
INSTRUM  spect
PROBHD   5 mm PABBO BB-
PULPROG  zg30
TD       65536
SOLVENT  CDC13
NS       16
DS       2
SWH      8223.685 Hz
FIDRES   0.125483 Hz
AQ       3.9846387 sec
RG       205.82
DW       60.800 usec
DE       6.50 usec
TE       297.9 K
D1       1.00000000 sec
TD0     1
  
```

```

===== CHANNEL f1 =====
NUC1    1H
P1      14.00 usec
SI      65536
SF      400.1300098 MHz
WDW     EM
SSB     0
LB      0.30 Hz
GB      0
PC      1.00
  
```

<sup>1</sup>H NMR Spectrum of Compound 8l

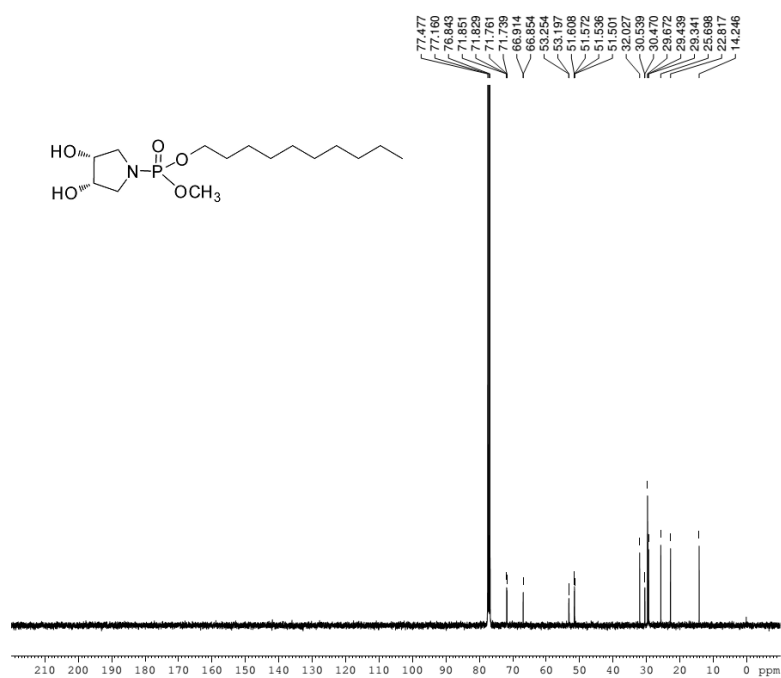

**BRUKER**

```

NAME      YXM-4-26-P1012
EXPNO    3
PROCNO   1
Date_    20140426
Time     10.08
INSTRUM  spect
PROBHD   5 mm PABBO BB-
PULPROG  zgpg30
TD        65536
SOLVENT  CDCl3
NS        2052
DS        4
SWH      26041.666 Hz
FIDRES   0.397364 Hz
AQ        1.2583412 sec
RG        205.82
DW        19.200 usec
DE        6.50 usec
TE        298.9 K
D1        1.25000000 sec
D11       0.03000000 sec
TD0       1

----- CHANNEL f1 -----
NUC1      13C
P1        9.00 usec
SI        32768
SF        100.6127539 MHz
WDW       EM
SSB       0
LB        1.00 Hz
GB        0
PC        1.40

```

<sup>13</sup>C NMR Spectrum of Compound 81

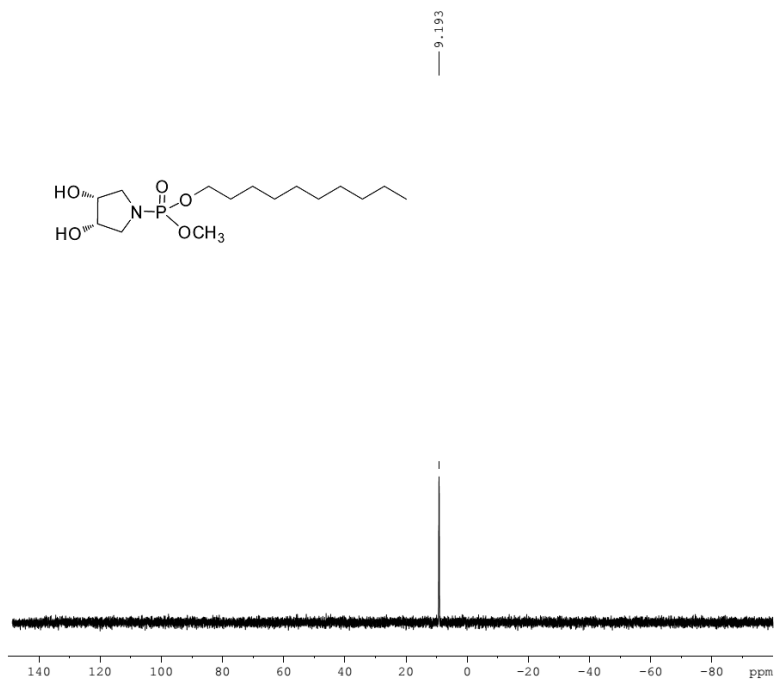

**BRUKER**

```

NAME      YXM-4-26-P1012
EXPNO    2
PROCNO   1
Date_    20140426
Time     11.40
INSTRUM  spect
PROBHD   5 mm PABBO BB-
PULPROG  zg30
TD        65536
SOLVENT  CDCl3
NS        32
DS        4
SWH      64102.563 Hz
FIDRES   0.978127 Hz
AQ        0.5112308 se
RG        205.82
DW        7.800 us
DE        6.50 us
TE        298.4 K
D1        2.00000000 se
TD0       1

----- CHANNEL f1 -----
NUC1      31P
P1        14.00 us
SI        32768
SF        161.9754688 MH
WDW       EM
SSB       0
LB        1.00 Hz
GB        0
PC        1.40

```

<sup>31</sup>P NMR Spectrum of Compound 81
